# Supplementary material
Source: PubMed Central journal article supplement (PMC6859309)
Supplement: pnas.1914202116.sapp.pdf [file pnas.1914202116.sapp.pdf]

Supplementary Information for

**An on-board checking mechanism ensures effector delivery of the type  
VI secretion system in *Vibrio cholerae***

Running title: Effector-loading ensures secretion efficiency

**Xiaoye Liang<sup>a,1</sup>, Fatima Kamal<sup>b,1</sup>, Tong-Tong Pei<sup>a</sup>, Ping Xu<sup>a</sup>, John J. Mekalanos<sup>c,2</sup>, and Tao G.  
Dong<sup>a,b,2</sup>**

<sup>1</sup> Contributed equally.

<sup>2</sup> Correspondence to [tdong@ucalgary.ca](mailto:tdong@ucalgary.ca) or [john\\_mekalanos@hms.harvard.edu](mailto:john_mekalanos@hms.harvard.edu)

<sup>a</sup>State Key Laboratory of Microbial Metabolism, Joint International Laboratory on Metabolic and Developmental Sciences, School of Life Sciences and Biotechnology, Shanghai Jiao Tong University, 200240 Shanghai, China; <sup>b</sup>Department of Ecosystem and Public Health, University of Calgary, Calgary, AB T2N 4Z6, Canada; and <sup>c</sup>Department of Microbiology and Immunobiology, Harvard Medical School, Boston, MA 02115

**This PDF file includes:**

Supplementary text  
Figures S1 to S5  
Tables S1  
SI References

**Other supplementary materials for this manuscript include the following:**

Datasets S1

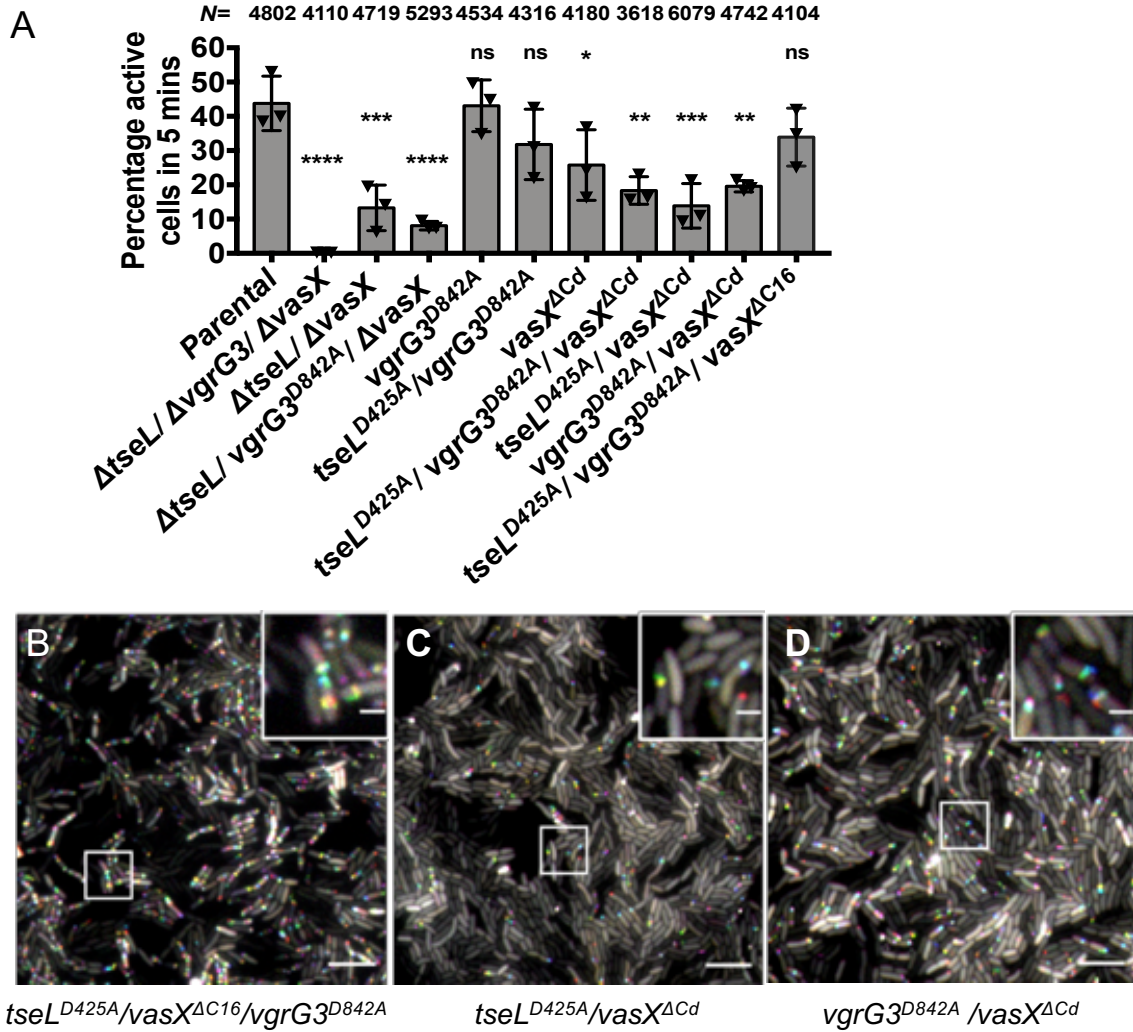

**Fig. S1.** Quantification and comparison of sheath formation in all mutants. A, *N* indicates the number of cells counted for each strain. Error bars indicate the mean +/- standard deviation (*n*=3). One-way ANOVA with Dunnett's multiple comparisons test compared to parental \*\*\*\**P* < 0.001; \*\*\**P* < 0.001; \*\**P* < 0.005; \**P* < 0.05; ns, not significant. B-D, 40 X 40  $\mu$ m representative field of cells with a 3X magnified 5 X 5  $\mu$ m inset (marked by box) is shown. VipA-mCherry signal was followed for 5 minutes and temporally color coded. Representative images are shown with a close up of a selected region as an inset. Scale bar for large field of view represents 5  $\mu$ m and for the inset represents 1  $\mu$ m. Genotypes are as indicated.

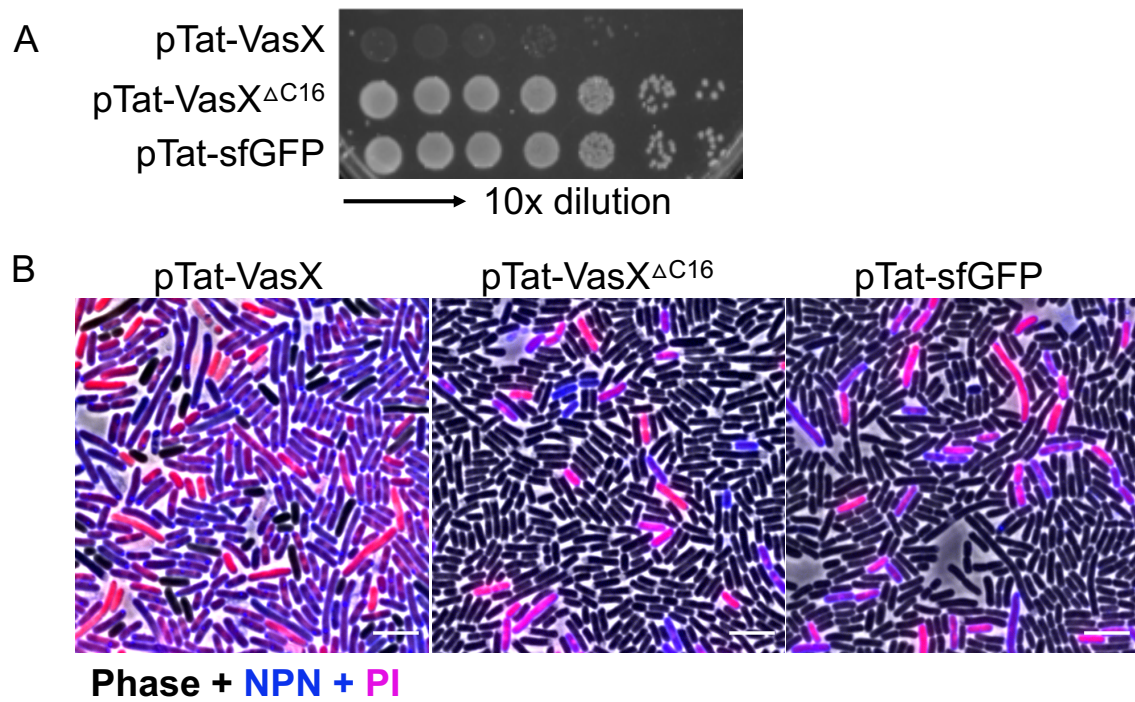

**Fig. S2.** Periplasmic expression of VasX results in membrane damage and cell death. A, survival of cells expressing pTat-VasX and pTat-VasX<sup>ΔC16</sup> by serial dilution. B, merged images of cells expressing pTat-VasX and pTat-VasX<sup>ΔC16</sup>. The phase-contrast, NPN and PI channels are merged and representative images shown. Fluorescence signals for NPN and PI are depicted in blue and red respectively.

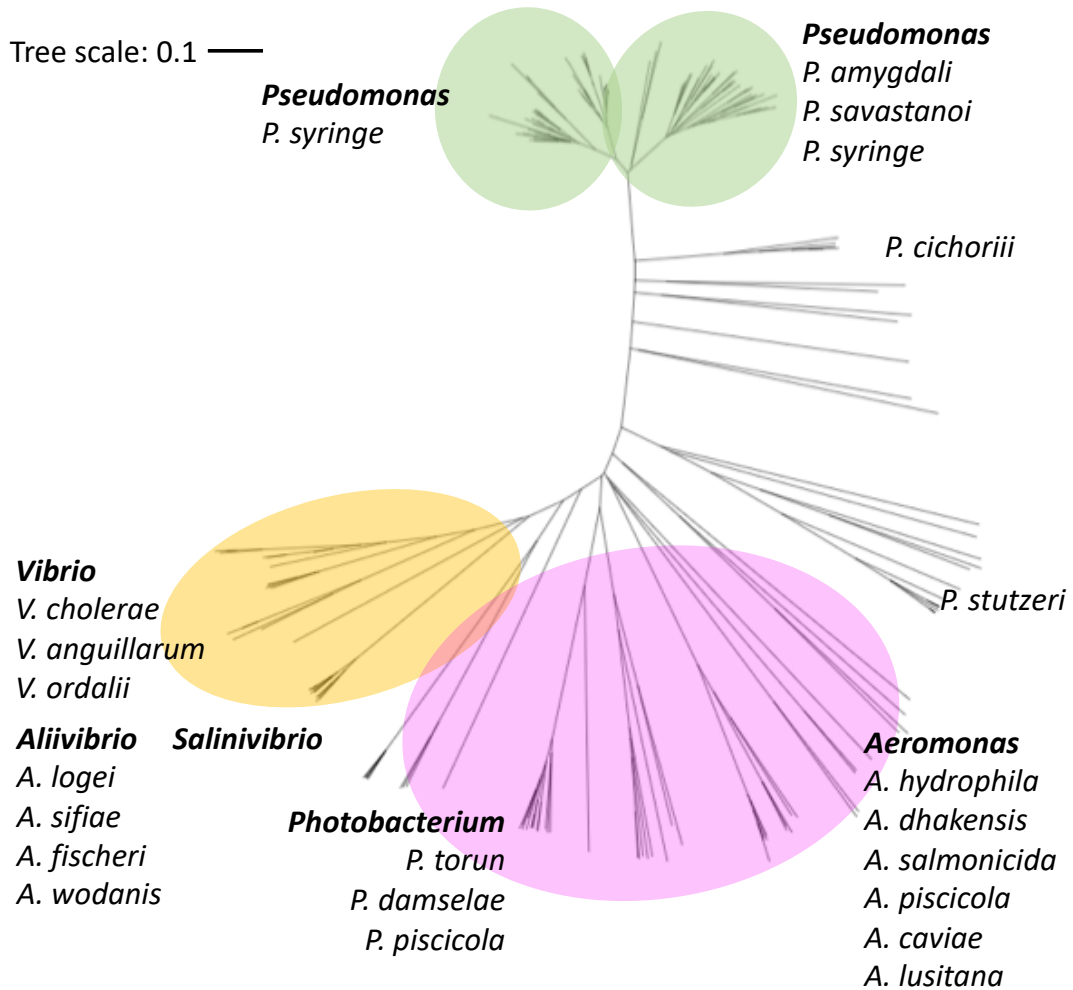

**Fig. S3.** Neighbor-joining tree of VasX homologs. Sequences of 198 VasX homologs were downloaded from the HMMER database and analyzed using Jalview and EMBL-EBI. The graphic view is generated by iTOL. Representative species and their relative clusters are indicated.

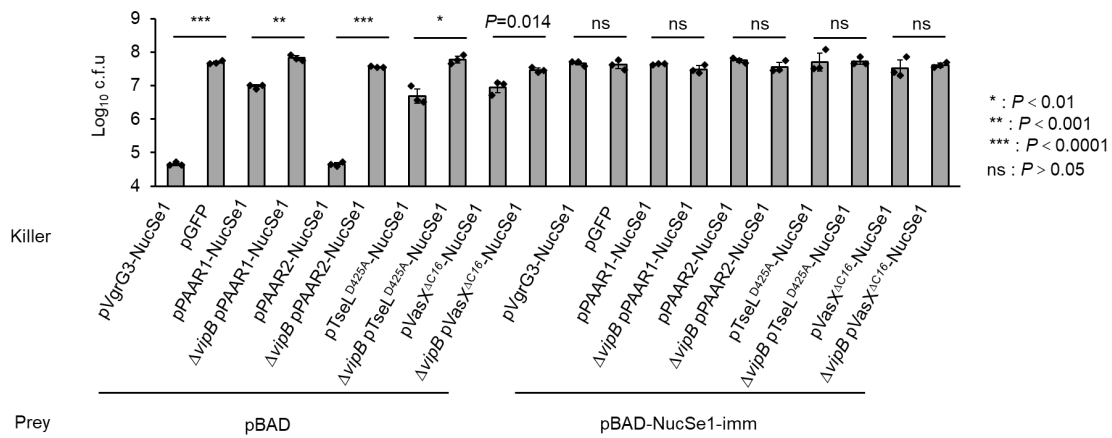

**Fig. S4.** Delivery of chimeric cargo by T6SS. Please also see Figure 5 for a representative assay plate and detailed description. Data were obtained from independent triplicate samples. Error bars show standard deviation. Statistical analysis was performed using the Student's *t*-test and *P*-values indicated.

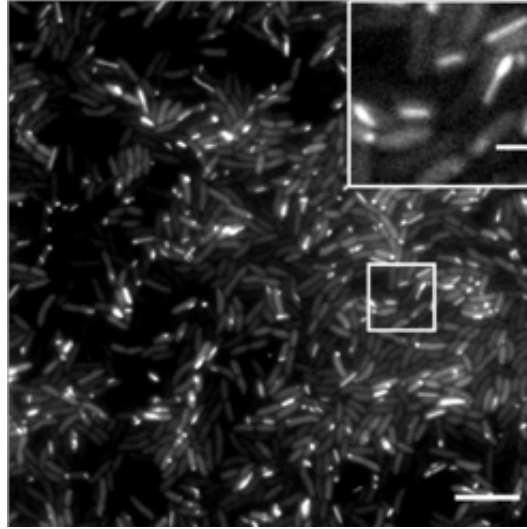

*vipA-N3-sfgfp ΔtseL/ΔvasX/ ΔvgrG3*

**Fig. S5.** Non-contractile sheath formation in the  $\Delta tseL/\Delta vasX/\Delta vgrG3$  mutant. 40 X 40  $\mu\text{m}$  representative field of *V. cholerae vipA-N3-sfgfp* effector deletion mutant with a 3X magnified 5 X 5  $\mu\text{m}$  inset (marked by box) is shown. VipA-N3-sfGFP signal was followed for 5 minutes. Scale bar for large field of view represents 5  $\mu\text{m}$  and for the inset represents 1  $\mu\text{m}$ .

**Table S1.** Strains and plasmids used in this study.

| Strain                        | Genotype                                                                                       | Description                                                                               | Source     |
|-------------------------------|------------------------------------------------------------------------------------------------|-------------------------------------------------------------------------------------------|------------|
| <i>V. cholerae</i><br>V52 rhh | Parental                                                                                       | Deletion in <i>rtxA hlyA hapA</i> , parental strain                                       | (1)        |
|                               | $\Delta vasK$                                                                                  | T6SS null, in-frame deletion of VCA0120                                                   | (1)        |
|                               | <i>vipA-mCherry2</i>                                                                           | C-terminal chromosomal fusion of mCherry2 to VipA                                         | (2)        |
|                               | <i>vipA-mCherry2, tseL<sup>D425A</sup></i>                                                     | Chromosomal mutation of the TseL catalytic residue D425                                   | This study |
|                               | <i>vipA-mCherry2, vgrG3<sup>D842A</sup></i>                                                    | Chromosomal mutation of the VgrG3 catalytic residue D842                                  | This study |
|                               | <i>vipA-mCherry2, vasX<sup>ΔCd</sup></i>                                                       | Chromosomal deletion of the colicin domain (R775-I915) of VasX                            | This study |
|                               | <i>vipA-mCherry2, tseL<sup>D425A</sup>/vgrG3<sup>D842A</sup></i>                               | Double mutations in <i>tseL</i> and <i>vgrG3</i>                                          | This study |
|                               | <i>vipA-mCherry2, tseL<sup>D425A</sup>/ vasX<sup>ΔCd</sup></i>                                 | Double mutations in <i>tseL</i> and <i>vasX</i>                                           | This study |
|                               | <i>vipA-mCherry2, vgrG3<sup>D842A</sup>/vasX<sup>ΔCd</sup></i>                                 | Double mutations in <i>vgrG3</i> and <i>vasX</i>                                          | This study |
|                               | <i>vipA-mCherry2, tseL<sup>D425A</sup>/vasX<sup>ΔCd</sup>/vgrG3<sup>D842A</sup></i>            | Triple inactive mutations of VgrG3, TseL, and VasX                                        | This study |
|                               | <i>vipA-mCherry2, ΔtseL/ΔvasX/ΔvgrG3</i>                                                       | In-frame deletion of the three effectors                                                  | This study |
|                               | <i>vipA-mCherry2, ΔtseL/ΔvasX/ vgrG3<sup>D842A</sup></i>                                       | In-frame deletion of <i>tseL</i> and <i>vasX</i> , point mutation in <i>vgrG3</i>         | This study |
|                               | <i>vipA-mCherry2, vasX<sup>ΔC16</sup></i>                                                      | Deletion of a 16-aa loop (A852 to F867) in the colicin domain                             | This study |
|                               | <i>vipA-mCherry2, tseL<sup>D425A</sup>/vasX<sup>ΔC16</sup>/vgrG3<sup>D842A</sup></i>           | Triple effector inactive mutations including the loop deletion in VasX                    | This study |
|                               | <i>vipA-mCherry2, ΔvipB<br/>tseL<sup>D425A</sup>/vasX<sup>ΔC16</sup>/vgrG3<sup>D842A</sup></i> | T6SS null of the triple effector- inactivated mutant,<br>in-frame deletion of <i>vipB</i> | This study |
|                               | <i>vipA-N3-sfgfp, ΔtseL/ΔvasX/ΔvgrG3</i>                                                       | Non-contractile sheath mutant                                                             | (3)        |

|                |                                                                                                |                                                   |               |
|----------------|------------------------------------------------------------------------------------------------|---------------------------------------------------|---------------|
|                | <i>ΔtsiV1</i>                                                                                  | Immunity mutant of TseL, deletion of VC1417-21    | (4)           |
|                | <i>ΔtsiV2</i>                                                                                  | Immunity mutant of VasX, deletion of VCA0019-21   | (4)           |
|                | <i>ΔtsiV3</i>                                                                                  | Immunity mutant of VgrG3, deletion of VCA0123-24  | (4)           |
| <i>E. coli</i> |                                                                                                |                                                   |               |
| PIR1           | F- <i>Δlac169 rpoS(Am) robA1 creC510 hsdR514 endA recA1 uidA(ΔMluI)::pir-116</i>               | Strain used for cloning                           | Invitrogen    |
| SM10 (λ pir)   | Km <sup>r</sup> , <i>thi-1, thr, leu, tonA, lacY, supE, recA::RP4-2-Tc::Mu, pir</i>            | Strain used for conjugation                       | Mekalanos lab |
| CC114          |                                                                                                | A transposon mutant used as prey for T6SS killing | Mekalanos lab |
| DH5alpha       | F- <i>Φ80lacZΔM15 Δ(lacZYA-argF) U169 recA1 endA1 hsdR17 phoA supE44 thi-1 gyrA96 relA1 λ-</i> | Strain used for cloning                           | Invitrogen    |

## Plasmid

| Plasmid                               | Description                                                             | Source     |
|---------------------------------------|-------------------------------------------------------------------------|------------|
| pDS132                                | Suicidal conjugation vector for all chromosomal allelic changes         | (5)        |
| pDS132- <i>tseL</i> <sup>D425A</sup>  | Suicidal vector to construct chromosomal <i>tseL</i> <sup>D425A</sup>   | This study |
| pDS132- <i>vgrG3</i> <sup>D842A</sup> | Suicidal vector to construct chromosomal <i>vgrG3</i> <sup>D842A</sup>  | This study |
| pDS132- <i>vasX</i> <sup>ΔCd</sup>    | Suicidal vector to construct chromosomal <i>vasX</i> <sup>ΔCd</sup>     | This study |
| pDS132- <i>vasX</i> <sup>ΔC16</sup>   | Suicidal vector to construct chromosomal <i>vasX</i> <sup>ΔC16</sup>    | This study |
| pDS132- <i>vipA-mCherry2</i>          | Suicidal vector to construct chromosomal insertion VipA-mCherry2        | (2)        |
| pBAD18                                | Arabinose-induced expression vector                                     | (6)        |
| pBAD18-VasX-3V5                       | For expressing VasX with a C-terminal 3 x V5 epitope tag                | This study |
| pBAD18-VasX <sup>ΔCd</sup> -3V5       | For expressing VasX <sup>ΔCd</sup> with a C-terminal 3 x V5 epitope tag | This study |



|                                      |                                                                                  |            |
|--------------------------------------|----------------------------------------------------------------------------------|------------|
| pBAD18-VasX <sup>ΔC16</sup> -3V5     | For expressing VasX <sup>ΔC16</sup> with a C-terminal 3 x V5 epitope tag         | This study |
| pPSV37-Tat-VasX                      | For expressing VasX in the periplasm, IPTG inducible                             | This study |
| pPSV37-Tat-VasX <sup>ΔC16</sup>      | For expressing VasX <sup>ΔC16</sup> in the periplasm, IPTG inducible             | This study |
| pPSV37-Tat-sfGFP                     | For expressing sfGFP in the periplasm, IPTG inducible                            | This study |
| pBAD33-VgrG3-NucSe1                  | For expressing chimeric VgrG3-NucSe1 fusion                                      | (7)        |
| pBAD33-NucSe1-imm                    | For expressing NucSe1 immunity protein                                           | (7)        |
| pBAD33-PAAR1-NucSe1                  | Derivative of VgrG3-NucSe1 for expressing chimeric VCA0105-NucSe1                | This study |
| pBAD33-PAAR2-NucSe1                  | Derivative of VgrG3-NucSe1 for expressing chimeric VCA0284-NucSe1                | This study |
| pBAD33-TseL <sup>D425A</sup> -NucSe1 | Derivative of VgrG3-NucSe1 for expressing chimeric TseL <sup>D425A</sup> -NucSe1 | This study |
| pBAD33-VasX <sup>ΔC16</sup> -NucSe1  | Derivative of VgrG3-NucSe1 for expressing chimeric VasX <sup>ΔC16</sup> -NucSe1  | This study |

---

## References

1. Ma AT, McAuley S, Pukatzki S, Mekalanos JJ (2009) Translocation of a *Vibrio cholerae* type VI secretion effector requires bacterial endocytosis by host cells. *Cell Host Microbe* 5(3):234–243.
2. Basler M, Ho BT, Mekalanos JJ (2013) Tit-for-Tat: Type VI secretion system counterattack during bacterial cell-cell interactions. *Cell* 152(4):884–894.
3. Brackmann M, Wang J, Basler M (2018) Type VI secretion system sheath inter-subunit interactions modulate its contraction. *EMBO Rep* 19(2):225–233.
4. Dong TG, Ho BT, Yoder-Himes DR, Mekalanos JJ (2013) Identification of T6SS-dependent effector and immunity proteins by Tn-seq in *Vibrio cholerae*. *Proc Natl Acad Sci* 110(7):2623–2628.
5. Philippe N, Alcaraz J-P, Coursange E, Geiselmann J, Schneider D (2004) Improvement of pCVD442, a suicide plasmid for gene allele exchange in bacteria. *Plasmid* 51(3):246–255.
6. Guzman LM, Belin D, Carson MJ, Beckwith J (1995) Tight regulation, modulation, and high-level expression by vectors containing the arabinose PBAD promoter. *J Bacteriol* 177(14):4121–4130.
7. Ho BT, Fu Y, Dong TG, Mekalanos JJ (2017) *Vibrio cholerae* type 6 secretion system effector trafficking in target bacterial cells. *Proc Natl Acad Sci U S A* 114(35):9427–9432.
