# Supplementary material
Source: PubMed Central journal article supplement (PMC6859309)
Supplement: pnas.1914202116.sd01.pdf [file pnas.1914202116.sd01.pdf]

>A0A0K9UXX8\_VIBCL/1-1085

MSNPNQAAKTGQTND AQNPASACPFKQPLIGIIPVRYAFDVYDDQGQALHPLPKADRQWKGQFSIKQRSY  
TL  
RQLRDGWL YVYDETA KTLHEYEVVGCKLTKIDWSDDEANKPTHERGSKGESKSCLLYPAQHTLSIGYAHQ  
RW  
TWRVCEHMRSNTSSRHAVMRKVSLKQFESNGTHPHAHFAQYLEDYVADIGTPAEQDIFKDTCTPSLPVEK  
SE  
EAVKGTEFKFVADKAVVSSSDYLQDLPEQNCGLFVALNDPLADVSDLFVTFTTQVAKRTKAIGDETQQHK  
MQ  
MAELTRTLGRIRLEEKEIPDFVKQDPIRILELERAITEYCATAKLAEIESHHLASEGHSPSGNYALMQQQ  
AE  
QKLAELKTLYRFEPTSAQMRKWRKKDNSFIDEVRWADLDNFLVEHYTELKGLDEQIKQHAYAQMFAFNQL  
GL  
DPLLFGMNQDEVQAYLLALTSQFLVVVTQVNHDEKSLEILKKDLSFDSPKNLMALASTGFSLQANQAI  
NN  
HIQGFSTAF LSTSNPSDMVAFATAIANWDTFTGDERIQEKAWFKRWIEPAQSSFGALQKAVANQAKESWQ  
AV  
MELLFPYQNPQKGGTPSLLANLRLLLVESLVREEAVLQHNPKYAAELKQFETKLNAILQEMNDALELKPG  
NV  
SPKNHQIATAQSAQRKLGQLLSSELPMMLTLKNQAAMNTFQQSVNEKLSALSKNVKTSSASVSQKLGGLG  
GL  
LFALNLWNTMTVLENIRYKVAQYPSWNPFKNPALGEAIYATGNTIVVAGAISAGRAWVTIAEQGLLDRTL  
KN  
ALNTTKVLGTDALKTFKSIALVATVGMIA SALETWESWGKFNDSSKTDLERFGYLLKAGATGAQGIIF  
YI  
QFFTLGSGIGGPSIAAISAGWMLAGFAVIGIVYLIGVILTNVFKRSELEIWLKSTWKGESAHWPVGKE  
LT  
ELEHLLHRPSLRLSQVTQRKAAQWMDSGSLQWQLELTL PDYLKGQTIGLQITRLPAQPAYYQPQREAVTP  
IL  
INEQQGKWSIEDNQPVYRITLGGSEKDTVGCVALPLRWGKELSLKFYASGTRAGELDLQSAEANDIATR  
NL  
VVGKG-----  
--  
-----  
--  
-----  
--  
-----  
--  
-----  
--  
-----  
--  
-----

>C3LU49\_VIBCM/1-1088

MSNPNQAAKTGQTND AQNPASACPFKQPLIGIIPVRYAFDVYDDQGQALHPLPKADRQWKGQFSIKQRSY  
TL  
RQLRDGWL YVYDETA KTLHEYEVVGCKLTKIDWSDDEANKPTHERGSKGESKSCLLYPAQHTLSIGYAHQ  
RW  
TWRVCEHMRSNTSSRHAVMRKVSLKQFESNGTHPHAHFAQYLEDYVADIGTPAEQDIFKDTCTPSLPVEK  
SE  
EAVKGTEFKFVADKAVVSSSDYLQDLPEQNCGLFVALNDPLADVSDLFVTFTTQVAKRTKAIGDETQQHK  
MQ  
MAELTRTLGRIRLEEKEIPDFVKQDPIRILELERAITEYCATAKLAEIESHHLASEGHSPSGNYALMQQQ



GL  
LFALNLWNTMTVLENIRYKVAQYPSWDPSKNPALGEAIYATGYTIVAAGAISAGRAWVTIAEQGLLDRTL  
KN  
ALNTTKVLGTKDALKTFAKSIALVATVGMIAASALETWESWGKFNDSSKTDLERFGYLLKAGATGAQGIIF  
YI  
QFFTLGSGIGGPSIAAISAGWMLAGFAVIGIVYLIGVILANVFKRSELEIWLKSTWKGESAHWPVGQE  
LT  
ELERLLHRPSLRLSQVTQRKAAQWMDSGSLQWQLELTPDYLGQTIGLQITRLPAQPAYYQRQREAVTP  
IL  
INEQQGKWSIEDNQPVYRITLGGSEKDTVGVCVLPLRWGKEQSLKFCASGTRAGELDLQSAEANDIATR  
NL  
VVGKG-----  
--  
-----  
--  
-----  
--  
-----  
--  
-----  
--  
-----  
--  
-----

>A0A366AHM8\_9VIBR/1-1085

MSNPNQAAKTGQTNDANPASACPFKQPLIGIIPVRYAFDVYDDQGQALHPLPKADRQWKGQFSIKQRSY  
TL  
RQLRDGWL VVYDETAKT LHEYE VVGCKLTKIDWSDDEANKP THERGSKGESKSCLLYPAQHTLSIGYAHQ  
RW  
TWRVCEHMRSNTSSRHAVMRKVSLKQFESNGTHPHAHFAQYLEDYVADIGTPAEQDIFKATCTPLLPVEK  
SE  
EAVNGTEFKFVADKAVVSSSGYLQDLPEQNCGLFVALNDPLADVSDLFVTFTTQVAKRTKAVGDETQQHK  
MQ  
IAELTRTLGRIRLEEKEIPDFVKQDPIRILELERAITEYCATAKLAIESHHLASEGHSPSGNYAFMQQ  
AE  
QKLAELKTLYRFEPTSAQMRKWRKKDNSFIDEVRWADLDNFLVEHYTELKGLDEQIKQHAYAQFISAFNQL  
GL  
DPLLFGMNQDEVQAYLLALTSQFLVVVTQVNHDEKSLEILKKDLSFDSPKNLMALASTGFSLQANQAI  
NK  
HIQGFSTAFSTSNPSDMVAFSTAIANWDTFTGDERFKDKAWFKRWIEPVQSSFSALQKAVANQAKESWQ  
AV  
MELLFPYQNPQKGGMPSLLANLRLLLVESLVREEAVLQHNPKYAAELKQFETKLNAILQGMNDALELKPG  
NV  
SPKNHQIATAQSAQRKLGQLLSELPMMLTLKNQAAMNTFQLSVNEKLSALSKNVKTSSASVSQKLGGLG  
GL  
LFALNLWNTMAVLENIRYKVAQYPSWDPFKNPALGEAIYATGYTIVAAGAISAGRAWGTIVKYELLDKSL  
KE  
ALGEASSLKAKDALKTFKSIKIALVATVGMIAASALETWESWGKFNDSSKTDLERFGYLLKAGATGAQGIIF  
YI  
QFFTLGSGIGGASIAAISAGWMLTGFVAVIGIVYLIGVILTNVFKRSELEIWLKSAWGKESAHWSVGQE  
LT  
ELERLLHRPSLRLSQVTQRKAAQWMDSGSLQWQLELTPDYLGQTIGLQITRLPAQPAYYQRQREAVTP  
IL  
INEQQGKWSIEDSRLVYRITLGGSEKDTVGVCVLPLRWGKEQSLKFCASGTRAGELDLQSAEANDIATR

NL

VVGKG-----

--

-----

--

-----

--

-----

--

>A0A0E3W0F6\_VIBCL/1-1086

MSNPNQAAKTGQTNDAQNPASACPFKQPLIGIIPVRYAFDVYDDQGQALHPLPKADRQWKGQFSIKQRSY

TL

RQLRDGWLIVYDETAKTLEHEYVVGCKLTKIDWSDDEANKPOTHERGSKGESKSCLLYPAQHTLSIGYAHQ

RW

TWRVCEHIRSNTSSRHAVMRKVSLKQFESNGTHPHAHFAQYLEDYVADIGTPAEQDIFKDTCTPSLPVEK

SE

EAVKGTEFKFVADKAVVSSKDYLQDLPEQNCGLFVALNDPLADVSDLFVTFTTQVAKRAKAVGDETQQHK

MQ

MAELTRTLGRIRLEEKEIPDFVKQDPIRILELERAITCYCATAKLAEIESYALASEGLAPSGNNAPMQQR

AE

QKLAELKTLYRFEPTSAQMRKWRKKDNSFIDEVRWADLDNFLVEHYTELKGLDEQIKQHAYAQFMSAFNQL

GL

DPLLFGMDNQDEVQAYLLALTSQFLVVVTQVNHDEKSLEILKKDLSFDSPKNLMALASTGFSLQANQAI

NN

HIQGFSTAFSTSNPSDMVAFATAIANWDTFTGDERIQEKAWFKRWIEPAQSSFGALQKAVANQAKESWQ

AV

MELLPYQNPQKGGTPSLLANLRLLLVESLVREEAVLQHNPKYAAELKQFETKLNAILQEMNDALELKPG

NV

SPKNHQIATAQSAQRKLGQLLSELPMMLTLKNQAAMNAFQQSVNEKLSALSKNVKTSSASVSQKLGGLG

GL

LFALNLWNTMTVLENIRYKVAQYPSWNPFKNPALGEAIYATGYTIVAAGAISAGRAWVTIVKYELLDKSL

KE

ALGEASSLKAKDALKTFSKSIALVATVGMIAASALETWESWGKFNDSSKTDLERFGYLLKAGATGAQALIF

AI

QLGVYGVSRFIGFGTIAAISAGWMAAGFAVIGIVYLIGVILTNVFKRSELEIWLKSMWKGESAHWSVGK

EL

TELERLLHRPSRLSQTQRKAAQWMDSGSLQWQLELTPDYLGQTIGLQITRLPAQPAYYQRQREAVT

PI

LINEQQGKWSIEDNQPVYRITLGGSEKDTVGVCVLPLHWVKEQSLKFCARGTRVGELDLQSAEANDIAT

RN

LVVGKG-----

--

-----

--

-----

--

-----

--

-----

>C2HYX9\_VIBAB/1-1087

MSNPNQAAKTGQTND AQNPASACPFKQPLIGIIPVRYAFDVYDDQGQALHPLPKADRQWKGFQFSIKQRSY  
TL  
RQLRDGWL YVYDETA KTLHEYEVVGCKLTKIDWSDDEANKP THERGSKGESKSCLLYPAQHTLSIGYAHQ  
RW  
TWRVCEHMRSNTSSRHAVMRKVSLKQFESNGTHPHAHFAQYLEDYVADIGTP TERDIFKDTCTPSLPVEK  
SE  
EAVNGTEFKFVADKAVVSSSDYLQDLPEQNCGLFVALNDPLADVSDLFVTFTTQVAKRTKAVGDETQQHK  
MQ  
MAELTRTLGRIRLEEKEIPDFVKQDPIRILELERAITEYCATAKLAEIESYALASEGLAPSGNYAFMQQ  
AE  
QKLAELKTL YRFEPTSAQMRKWRKKDNSFIDEVRWADLDNFLVEHYTELKGLDEKIKQHAYAQFMSAFNQL  
GL  
DPLLFGMDNQDEVQAYLLALTSQFLVVVTQVNHDEKSLEILKKDLSFDSPKNLMALASTGFSLQANQAI  
NN  
HIQGFSTAF LSTSSPSDMVAFSTAIANWDTFTGDGRIQEKA WFKKWI EPVQSSFSALQKAVANLAKESWQ  
AL  
MELLFPYQNP KGGTPSLLANLRLLLVESLVREEAVLQHNP KYAAELKQFETKLNAILQEMNDALELKPG  
NV  
SPKNHQIATAQSAQRKLGQLLSSELPMMLTLKNQAAMNTFQQSVNEKLSALSKNVKTSSVSVSQKLGGLG  
GL  
LFALNLWNTMTVLENIRYKVAQYPSWDPSKNPALGEAIYATGYTIVAAGAISAGRVWKTIASNQQLLESP  
LK  
RALQTTAGTTMQDALKTF SKSIALVATVGMIA SALETWESWGKFNDSSKTDLERFGYLLKGGATVTQMAI  
FA  
VQLVLYGVS RFIGFTIAAISAGWMAAGFAVIGIVYLIGVILTNVFKRSELEIWL SKSMWGKESAHWSVG  
KE  
LTELERLLHRPSRLS QVTQRKAAQWMDSGSLQWQLEL TLPDYLKGQTIGLQITRLPAQPAYYQRQREAV  
TP  
ILINEQQGKWSIEDNQPVYRITLGGSEKDTVGVCSLPLHWVKEQSLKFCARGTRAGELDLQSAEANDIA  
TR  
NLVVGKS-----  
--  
-----  
--  
-----  
--  
-----  
--  
-----  
--  
-----

>A0A395TF89\_VIBCL/1-1086

MSNPNQAAKTGQTND AQNPASACPFKQPLIGIIPVRYAFDVYDDQGQELHPLPKADRQWKGFQFSIKQRSY  
TL  
RQLRDGWL YVYDETA KTLHEYEVVGCKLTKIDWSDDEANKP THERGSKGESKSCLLYPAQHTLSIGYAHQ  
RW  
TWRVCEHMRSNTSSRHAVMRKVSLKQFESNGTHPHAHFAQYLEDYVADIGTPAEQDIFKATCTPSLPVEK  
SE  
EAVKGTEFKFVADKAVVSSSDYLQDLPEQNCGLFVALNDPLADVSDLFVTFTTQVAKRAKAVGDETQQHK  
MQ  
MAELTRTLGRIRLEEKEIPDFVKQDPIRILELERAITEYCATAKLAEIESYALASEGLSPSGNYAPMQQR



GL  
LFALNLWNTMAVLENIRYKVAQYPSWDPSKNPALGEAIYATGYTIVAAGAISAGRAWGTIVKYELLDKSL  
KE  
ALGEASSLKAKDALKTFKSIALVATVGMIAASGLEAWESWGKFNDNSKTDLERLGYLLKGGATGAQMLIF  
VA  
QTMRLIQNILGFSSIAAINAGWMLTGFAVIGIVYLIGVILTNVFKRSELEIWLKSTWKGESAHWSVGQE  
LT  
ELERLLHRPSLRLSKVTQRKPAQWMDAGSLQWQLELTPDYLLKGQTIGLQITRLPAQPAYYQRQREAVTP  
IL  
VNEQQGKWSIEDHQSVYRITLGGSDKDTVGVCSLPLRWVNEQSFKFCASGTRAGKLDLQSAEANDIATR  
NL  
VVGKG-----  
--  
-----  
--  
-----  
--  
-----  
--  
-----  
--  
-----  
--  
-----

>A0A1Y0NX82\_VIBAN/1-1086  
MSNPNQAAKTGTNDANPASACPFKQPLIGIIPVRYAFDVYDKQGQALHSLPEADRQWKGQFSTKQRSY  
TL  
RQLRDGWL VVYDETAKTLEHEYEVGSLTKIEWSDDEASKPOTHERGSKGESKSCLLYPAQHTLSIGYAHQ  
RW  
TWRVCEHMRSNTSSRHAVMRKVSLKQFESNGTHLHAHFAQYLEDYVADIGTPAEQDIFKATCTPSLPVEK  
SE  
EAAIDTEFKFVADKAVVSCSDYLQDLPEQNCGLFVALNDPLADVSDLFITFTTQVKKRTKAVGNEEQHA  
MQ  
MAELTRTLGRIRLEEKEIPDFVKQDPIRILELERAITEYWATAELAEMEFSQLASEGITPSKALSPMQQ  
AD  
QQLAELKTLYRFEPTSAQMRKWRKKDNGFNDEVRWADLDNFLVEHYTQLKGLDEQIKQHAYAQMFAFNQL  
GL  
DPILLGIDNQDEIQAYLLALISQFLVAVTQVNHDEKALETLLKELSFDSPKNLMALASTGFSLQANQAI  
NS  
HIQDFSTSFLSTGNPSDMVAFSAIANWDTFTGDGRIREKAWFKTWIEPVQSSFGALQKAVANQAKESWQ  
VV  
MELLFPYQTQPKGGTPSLLANLRLLLVESLVREEAVLQHNPKYAAEIKQFETKLNAILQEMNNALELKP  
NV  
SPKNHQIATAQSAQRKLGQLLSELPMMLTLKNQAVMNTFQQSVNEKLSALSKNVKTSSASVSQKLGGLG  
GL  
LFALNLWNTMAVLENIRGKVAQYPSWDPSKNPALGEAIYATGYTIVAAGAISAGRAWKTIVKYELLDKSL  
KE  
ALGEASSLKAKDALKTFKSIALVATVGMIAASALETWESWGKFNDSSKTDLERFGYLLKAGATGAQALIF  
AI  
QLGVYGVSRFIGFGTIAAISAGWMAAGFAVIGIVYLIGVILTNVFKRSELEIWLKSMWKGESAHWSVGK  
EL  
IELERLLHRPSLRLSQVTQRKAAQWMDSGSLQWQLELTPDYLLKGQTIGLQITRLPAQPAYYQRQREAVT  
PI  
LINEQQGKWSIEDNQPVYRITLGGSEKDTVGVCSLPLHVVKEQSLKFCARGTRVGEGLDLQSAEANDIAT

RN

LVVVGKG-----

--

-----

--

-----

--

-----

--

-----

>A0A241PC54\_VIBAN/1-1087

MSNPNQAAKTGQTNDANPASACPFKQPLIGIIPVRYAFDVYDDQGQALHPLPKADRQWKGQFSTKQRSY

TL

RQLRDGWLYVYDETAKTLEHEYEVVGSTLTKIEWSDDEANKPOTHERGSKGESKSCLLYPAQHTLSIGYAHQ

RW

TWRVCEHMRSNTSSRHAVMRKVSLKQFESNGTHPHAHFAQYLEDYVADIGTPAEQDIFKATCTPSLPVEK

SE

EAAIDTEFKFVVDKAVVSSSDYVQDLPEQNCGLFVALNDPLADVSDLFITFTTQVADLTKKEVGDEAQKH

KM

QMAELTRTLGRIRLEEKEIPDFVKQDPIRILELERAITEYWATAELAEMEFSQLASEGITPSKALSPMQQ

QA

DQQLAELKTLYRFEPTSAQMRKWRKKDNGFNDEVRWADLDFLVEHYTQLKGLDEQIKQHYAQFMSAFNQ

LG

LDPILLGIDNQDEIQAYLLALISQFLVAVTQVNHDEKALETLLKELSFDSKPNLMALASTGFSLQANQA

IN

SHIQGFSTSFLSTGNPSDMVAFSAAIANWDTFTGDGRIREQAWFKAWIEPVQSSFGALQKAVANQAKESW

QA

VMELLFPYQTQPKGGTPSLLANLRLLLVESLVREEAVLQHNPKYAAELKQFETKLNVLQEMNDALELKP

GN

VSPKNHQIATAQSAQRKLGQLLSSELPMFTLKNQAAMNTFQQSVNEKLSALSKNVKTSSASVSQKLGGL

GG

LLFALNLWNTMAVLENIRYKVAQYPSWDPSKNPALGEAIYATGYTIVAAGAISAGRAWGTIVEQGLLKES

LK

VALKDTAGMAMQDALKTFAKSIALVATVGMIASGLETWESWGKFNDNSKTDLERFGYLLKAGATGAQALI

FA

IQLGVCVSRIMGFGSIAAINAGWMLAGFAVIGIVFLIGVILTNVFKRSELEIWLKSTWKGESAHWSVG

QE

LTELERLLHRPNIRLMPVPANKLSYQAYRPTMQWQLELVLPVSYMGGQTIGLQITRLPPQEGYSYRTQSAN

PL

VLIDEQQGKWSIEDEQPVYRITLGGSDKDTVGVCVLPLHLWLEQSLKFCARGTRAGELDLQSAEANNIA

TR

NLVVVGKG-----

--

-----

--

-----

--

-----

--

-----

>A0A378MUZ8\_VIBAN/1-1087

MSNPNQAAKTGQTND AQNPASACPFKQPLIGIIPRYAFDVYDKQGQALHPLPKAERQWKGQFSTKQRSY  
TL  
RQLRDGWL YVYDE TAKTLHEYEVV GSTLTKIEWSDDEASKPTHERGSKGESKSCLLYPAQHTLSIGYAHQ  
RW  
TWRVCEHMRSNTSSRHAVMRKVSLKQFESNGSHLHAHFAQYLEDYVADIGTPAEQDIFKATCTPSLPVEK  
SE  
EAAIDTEFKFVVDKAVVSSSDYLQDLPEQNCGLFVALNDPLADVSDLFITFTTQVADLTKKEVGDEAQQH  
KM  
QMAELTRTLGRIRLEEKEIPDFVKQDPIRILELERAITEYWATAELAEMEFSQLASEGITPSKALSPMQQ  
QA  
DQQLAELKTLYRFEPTSAQMRKWRKKDNGFNDEVRWADLDNFLVEHYTQLKGLDEQIKQHAYAQFMSAFNQ  
LG  
LDPILLGIDNQDEIQAYLLALISQFLVAVTQVNHDEKALETLLKELSFDSKPNLMALASTGFSLQANQA  
IN  
SHIQDFSTSFLSTGNPSDMVAFSAAIANWDTFTGDGRIREKAWFKTWIEPVQSSFGALQKAVANQAKESW  
QA  
VMELLFPYQTQPKGGTPSLLANLRLLLVESLVREEAVLQHNPKYAAEIKQFETKLNAILQEMNNALELKP  
GN  
VSPKNHQIATAQSAQRKLGQLLSSELPMMTLKNQAVMNTFQQSVNEKLSALSKNVKTSSASVSQKLGGL  
GG  
LLFALNLWNTMAVLENIRGKVAQYPSWDPSKNPALGEAIYATGYTIVAAGAISAGRAWKTIVKYELLDKS  
LK  
EALGEASSLKAKDALKTFSKSIALVATVGMIASGLEAWESWGKFNDSSKTDLERFGYLLKAGATGAQALI  
FA  
IQLGVYGVSRIMGFGSIAAINAGWMLAGFAVIGIVYLIGVILTNVFKRSELEIWLKSTWKGESAHWSVG  
QE  
LTELERLLHRPNIRLMPVPANKLSYQAYRPTMQWQLELVLP SYMQGQTIGLQITRLPPQEGYSYRTQSAN  
PL  
VLIDEQQGKWSIEDEQPVYRITLGGSDKDTVGVCVLPLHWVKEQSLKFCARGTRVGELDLQSAEANDIA  
TR  
NLVVGKG-----  
--  
-----  
--  
-----  
--  
-----  
--  
-----  
--  
-----

>A0A2N7JF06\_9VIBR/1-1084

MSTPNKVAKCASTKNAKSSSASCPFQSNKIGIIPVRYAFDDMNKQGQPLHPLPTTDTQWQGRFTPTQRQY  
TL  
RQLRDGWL YVYDETDKVFHEYQVEGYEFTKIDWSGDEADK PANERGSAGETKSCLVYP AKNTLSMTFAHQ  
RW  
TWRLCEHMRS HAPNRSIWMRKVN LQQFQSTLSHPHAGLSTELGQYVADVGT DGAPTDVFDSTCTPLTPIE  
SG  
VDDFKHVADKAGCWDLDYRADLPAQDCGMFIALDDPLADVSDLFLPLSEQVTARSTAYQDEDNLHKLQMA  
EF  
ARTLGRVKVDHDDLPEQVKGDPIQTMEFERQLTEYIATQYLADKERAAL EANYNVNYAPLTHLQEEALEK



LN  
LWNVSVVLQDIHHKAAQHPSSSLWTPAIREATYATGYAVSAVTAVWRDAKWEILAKDSELLKKSLNLAI  
KE  
EGASKSATLKTFAKTAAVSLFGLIATGFETWESYDKFTDSSHAPMERLGYGLKFISTSGQLAIFWVQFG  
RN  
AASFLGVASTSISAIIVASWMLTTLMVAGIVYLVIGVIIINAFKRSELEKWLLHSTWGKDPKQWDAIEELTH  
LE  
QIIHKPQAQLNAIPHRNPSHWMNPGTQQWQLELTLPAFAKGQSIGLQITRKPDKAYSAPAEAKPAVML  
NE  
QNGTWSQAQEEASPIIYRLDLGGTTDDTIAVLVSMPFNWQADEKQQLGYVATGRRQGDLTVEPAPKEFAT  
RT  
IEVRID-----  
--  
-----  
--  
-----  
--  
-----  
--  
-----  
--  
-----  
-----

>A0A3S0PQZ1\_9VIBR/1-1085  
MSTANKAAKCASTNDVKSATSLCQFRHDEIGIIPVRYAFDDKGENGLSLNPLPEKETQWNGRFAPKHRQY  
TL  
RQLRDGWLYVYDVTDKTFHEYQVQGGQFIKIDWSADEADKPAHERGSIGESKSCLYIPARNTLYMTFAHQ  
RW  
TWRLCEHMRSNPTNRSMWVRKVNLPQFQSTLSHPHAGRASEIGNYVADIGTQAAPTELFESTCTPLSAFE  
GS  
IDDFRHVADKAGCWDLDYREDLPAQDSGMFIALDDPLADVSDLFSPLADEVTKRSTVHQDEENLHKLQMA  
EL  
TRTLGRVKVDYDDLPEQVKDDPIKVMFERQLTEYVATQYLVDKERTALEANPNVGNAPFTQLQEEALEK  
HS  
ELKANYHFTPTDEQIESWQRNTVFSDEVNWEDELDAFLTQYYTQIKGLDERIDALYQDFMFSFEQLGTDPL  
AL  
GLDNQDEEHLAYLLSLTNQYLAIKQAVTTEQANEQLKQALSLSLSPKTLFAIASLGFSLDNWQALNSYVD  
EL  
KPGLLSVESASDMVALSSAIANWEAFTGDARMHDKAWFKALAEPVQLSFIALQKAASGLAQESWRRTTSNF  
LF  
PSQMNTTATTEGLISNLRLVLEAIVNPEAIVVHNPDYPAQLAAWQRKLNTEMTNIRRNVNQLPSGSVTPK  
NH  
QIQTMRRRAQQKMQLLSSELPMVMKHEAINNTAKQMLNDAIERSWQQGKQTTQASWDKLGKMGVVAI  
LN  
LWNVSVVLQNVQDKAQHPNSNFWTPAIREAVYATGYAVSAVTAVWRDAKWDILAKDSELLKKSLNIAI  
KE  
EGASRAASLKTFAKTAAVSLFGLIATGFETWESYDKVKDSSHAPMERLGYGLKGLSTGSQALVFVAQFT  
LN  
FFSRLGVGSISAIIVASWMLTTLMVAGIVYLVIAVIIINVFKRSELEKWLLYSTWGKESKQWSSVEELTLE  
QI  
IHKPQIQKLSVYSNAPSQTTYHAMGRQWQLEIALPAFTKGQLIGLQITRQPKDRAYSASAEKTAVMVN  
EQ  
NGTWSQDKEEGSPVIYRLDLGGSTDDTIAVLVSMPFNWQADENQRLGYVASGSSQGDLTVELAPKEFVTR

TI

EVRIE-----

--

-----

--

-----

--

-----

--

-----

>A0A1B9P5U4\_9GAMM/1-1088

MSTANKAAMCASTRDVRSPVGLCPFQRSDIGIIPVRYALDDMNEQGLQMHPFPASDTQWKGRFTPQQRQY

TL

RQLRDGWLYVYDETDKTFHEYQIEGYDFTKIEWSNDEADKPANERGRKGETKSCLVYPAKNTIYMAFAHQ

RW

TWRLCEHMRSHTSNRSLWMRKVNLIKQFNSALAHPTHGLSSKLGHYAADIGVNGAPTGIFNSTCTPLTSTE

AQ

TDSFKHVADKPGCWDVDYRVDLPAQDCGMFIALDDPLADVSDLFLPLAEEITLRSAIHKDEDNIHKLQMA

EI

TRNLGRVRLKPEDLPEQISDDPVKVLEFERQLTEYLAIQSLADKESAALESNPSTGNTPTPLQEEALEK

HS

ELKEKYHFTPSDEQKTAWEKNTLFSDEVNWESEDEFLEHTQHYTQLKDQDKRIAMLYQDFMEAFELLGTDPL

VI

GIDNQDEDHLTYLLSVISQYLQVIKQAVNTEKEYATLEIALSLDSPKTLFALASLGFSNDNLQALNDHVE

EL

SNHLISINSLGDMGALSGAIASWGGFTDDIRIQDNKWFEEALAEVQLSFIALQNAVVGQAKESWRGIANL

LF

PHQMNTATTPQGMISNLRVILEALVNPEAIVIHNPDPYPAHFQAAWQRKMNAEVMIIIRQISQPPSGOPTPK

NH

QIQTMRSAQQRMQKLLSSEIPVMVMLKYEAVNNAKQMLNEAIERSWQQGKDITQASWNKMGKMGVVAI

LN

LWNTAAVLKNIHKAEQYPESNVWTPAVREATYATSYAVSAVTAMWRDVAWGKMATNQSLLEPLKIAL

RS

STHSYELRQSLATFAKTAAVSLFGLIATGLETWESHDKFKDTSHPMERFGYGLKGISTFSQTVVYFFQ

FG

ANVFSRFGVFSTSIGAIIAPWMLTTFMVSSILFFISIIIIINAFKRSELEKWLLHSTWGKASKQWEVDEL

TR

LEQIIHKPQVRLNKVFSSPSKAIYGSVAGQQWQLEIYLPMTYKGSIGLQVTRTPMQNKYSYVTSSPKP

TV

VVNEQNGVWSKDETGPNVYRLDLAGTTKDSITVFISLFPNWQASEHEKLGYIASGNSQGELVISPAFKES

SI

RTINVDVN-----

--

-----

--

-----

--

-----

--

-----

>A0A1B9P358\_ALILO/1-1089

MSTANKAAMCASTRDAKSPAGLCPFQRSDIGIIPVRYALDEMNEQGLQMHPFPASDPQWKGRFTPKQRQY  
TL  
RQLRDGWLYVYDETDTTFHEYQIEGYEFTNIDWSSDEADKPANKRGSKGETKSCLVYPAKNTIYMAFAHQ  
RW  
TWRMCEYMRSHEENCSVWVRKVNKQFKSTLAHPHAGLSSKLGHYAADIGVNGAPAGIFDSTCTPLASTE  
AQ  
TDSFKHVADKPGCWDVDYRVDLPAQDCGMFIALDDPLADVSDLFLPLAEITLRSIHKDEDNIHKLQMA  
EI  
TRNLGRVRLKPEELPEQINDDPMKILEFERQLTEYLAIQSLADKESAAFDSNPSIGNAPFTPLQEEALEK  
HS  
ELKEYHFTPSDEQKTAWKNTLFSDEVNWNELDEFLLTQHYTQLKDQDKRIAMLYQDFMEAFEQLGTDPF  
VI  
GIDNQDEAHLTYLLSLISQYVQVIKQTVNTEKEYATLESALSLDSPKTLFSLASLGFSDNLQALNDHVE  
DL  
SNHLLSTNSSGDMGALSGAIASWGGFTDDIRIQDNKWFKALAEPVQLSFIALKNAVGTGQAKESWRGIANL  
LF  
PHQMNATTPQGMISNLRVILEALVNPEAIVIHNPDPYPAHFAAWQRKMNAEVMIIIRQISQPPSGQLTPK  
NH  
QIQTMRSAQQRMQKLLSSELPVMMLKYEAVNNAKQMLNEAIERSWQQGDITQASWNKMGKMGVVAI  
LN  
LWNTAAVLKNIHKKAAQHPESDLWTDPAVREATYATSYAVSAVTAMWRDVAWGKMATNQSLLESKIAL  
RS  
STHSYELRQSLATFAKTAAVSLFGLMATGLETWESHDKFKDTSHPMERFGYGLKGASTAAQLFVFSMQ  
FR  
SNIYSLIGRTSIIIIAPWMLTTFMVSSILLFISIIIIINAFKRTELEKLLHSTWGKDAKDWEVVDELTR  
LE  
QIIHKPQVRLNKVFSGSPSKAIYGSVAGQQWQLEISLPMHTKKGKISGLQVTRTPVQNNYSYVASSPKPAV  
FV  
NEQNGIWSKDGTGNPVYRLDLGGTTKDSITAFISLFPNWQSSEHDQLGYIASGNSQGELVILPARKDNVI  
RT  
IKVEVNDFF-----  
--  
-----  
--  
-----  
--  
-----  
--  
-----  
--  
-----  
--  
-----

>A0A1S6HL18\_9GAMM/1-1110

MSDPNKAACKAPAKESNSPVGLCPLRFNEIGIIPVRYAFDDVDEQGSVHSLPDSAERGRFKPVNSQYT  
LR  
QLRDGWLYVYNQTAKTFFHEYQVEGFEFIKIDWSDSEANKPASERGTPGERKSCLIYPKTDTHLVAHQ  
WT  
WRVCEHMRSNSQSRQTMVRKLDLKRYSSTMKAPHAQDARKLAESVADVSLQGEATDVFVQTCTPLVPDGE  
SR  
SDDFKLVANKPDCSDLDYLDLPAQDSGVFIALDDPLADVSDLFLKLSVEVTERVAILGDEETIHKQMA  
EL  
ARSLGRVRVEYDELPAKEDPLQVLAFEKALTKYLALRHLADNAREGLDNNPDMSDNALFKDALTNVQE



LN  
LWNTAAVLKLNHKKAAQHPESDLWTDPAVREATYATSYAVSAVTAMWRDVTWSKMATDGELLKKSLLHAI  
KE  
ASVSETIALKTFAKTTAAVSLFGLIATGLETWESHDKFKDTSHPMERFGYGLKGVSTFSQTFVYFFQFG  
AN  
VFSRFGIFSTSIGAIIAPWMLTTFMVSAILFFISIIIINTFKRSELEKWLLHSTWGKASKQWEVDELTR  
LE  
QIIHKPQVRLNKVISSLPSKAMYASAVGQQWQLEISLPMYTKGKSIGLQVTRTPMQNKYSYVTSSPKPTV  
VV  
NEQNGIWSKDEAGNPVYRLDLAGTTKDSITVFISLPFNWQASEHEQLGYIASCNSQGELVISPAFKESSI  
RT  
INVDVN-----  
--  
-----  
--  
-----  
--  
-----  
--  
-----  
--  
-----

>A0A1E5APV7\_ALIFS/1-1092

MSTANKAAMCASTRDVKSPAGLCPFQRSDIGIIPVRYALDDMNEQGLQMHPFPATDTQWKGRFTPCKRQY  
TL  
RQLRDGWLYVYDETDKTFHEYQIEGYEFTKIEWSNDEADKPANERGSKGETKSCLVYPAKNTIYMAFAHQ  
RW  
TWRLCEHMRSHETNRSLWMRKVNLKQFNSALAHPTGLSSKLGHYAADIGVNGAPTGMFDSTCTPLTSTE  
AQ  
TDSFKHVADKPGCWDVDYRVDLPAQDCGMFIALDDPLADVSDLFLPLAEEITLRSAIHKDEDNIHKLQMA  
EI  
TRNLGRVRLKPEDLPEQISDDPVKVFLEFERQLTEYLAIQSLADKESAAFDSNPSIGNVPFTPLQEEALEK  
HS  
ELKEYHFTPSDEQKTAWEKNTLFSDEVNWESELDEFLLTQYYTQLKDQDKRIAMLYQDFMEAFEQLGTDPL  
VI  
GIDNQDEDHLYLLSVISQYLQVIKQAVNTEKEYATLESALSLDSPKTLFALASLGFSNDHLQALNDHVE  
EL  
SNHLISTNSSGDMGALSGAIASWGGFTDDIRIQDNKWFKALAEPVQLSFLALQNAVGTGQAKESWRGIANL  
LF  
PHQMNTATTPQGMISNLRLVILEALVNPEAVVIHNPDPYPAHFAAWQRKMNAEVMVIRQISQPPSGQPTPK  
NH  
QIQTMRSAQQRMQKLLSSELPVMMLKYDAVNNATKQMLNEAIERSWQQGDITQASWNKMGKMGVVAT  
LN  
LWNTAAVLKNIHKKAAQHPESDLWTDPAVREATYATSYAVSAVTAVWRDVAWGKMATDGELLKKSLLSEAI  
KR  
SASSELVTLKTFAKTTAAVSLFGLIATGLEAWESHDKFKDTSHPMERFGYGLKGFSTVIQTIIVFGGQLT  
AL  
ISSRLGWTFRSFGLLSIIAPWILTTFMVGSILFLISIIIIINAFKRTELEKWLLHSAWGKDAKHWEAVDE  
LT  
RLEQIIHKPQVRLNKVISSLPSKAIYGSAAGQQWQLEISLPMHTKGKSIGLQVTRTPMQNKYSYVSSSPK  
PA  
VLVNEQNGIWSKDDMGNPIYQLDLGGTSRDTITILVNMPFNWQASEHDQLGYIASGNSQGELVILPTRKD

NV

IRTIKVEVNDGF-----  
--  
-----  
--  
-----  
--  
-----  
--  
-----

>A0A090IQ83\_9GAMM/1-1092  
MSEANNAAMCGSKKDAKNPVGACPVKFGVIDIIPVRYAIDDMNREEKEQKHPLLDTHKGHGFFDVAHSKY  
TL  
RQLRDGWLYVYSNKDKTFHEYQVKGTQFIKIDWGSNEADKAPEERGQAGEAKSCLSYSKNDTLTISFSHQ  
RW  
TWRLCEHMRSNTQCRNEWMRTVDLKTYSNTLEIEHGGGMRDFVHAVADIGTPKPSDVLFEKTCSPDKDDD  
PS  
DDEFHLATHKKTVLETDYQCDLLEKNSALYIALDDQLADITDLFLKLSSEMAEKAAIMGDEDKQYKLQMA  
EL  
TRTLGRVRLDENELPKEIRKDPISIFQFEKELTDYLYIQGLANEEQALPAAESVHYEPVYTPQAKAKLQE  
LK  
NTYSYKPDSKLLKKFKEATAYTSDVNWEGLDEFVISHYSQLKGTSERINNYLSDFIAAVTQLGIDPLILG  
LD  
NQYENHQAYLLNLVSQFLIVVKQVPELEEQMKELDELLSFDSPNLLALAPVGFSFDNWEALNDHINEGG  
KP  
LIDPFSAGMDAFWSRFSEWDSFTGDARIQEKAWFQSLVLP IQKSFAALEGAVKNQVDTSWRATMDLLFP  
SQ  
WKKGASSINVVSNLRLIFLESMMTDSAIVEVNKSYKTQRATFLNKLNVHIEELKKATKTVPGQRASKNHQ  
VK  
STQAIQQRIQTILSSEMPAVLALKNSAVNAQAKQLVNNYVDTVWTQTKEVIEKNGKGLGKLGGLAALNI  
WE  
LAVVTKDVNYKAEQAGDTFYEQFKPVWREVAHASAYVANIISTLFRDKAWGEIKGNKRLLELSLKDVSLG  
HK  
SVEKSTVNIFAKHALITASFGLIATGLEAWESFDQIKDENKRVDERFGYWLKFGALTGQFTVFLAQGSLA  
LL  
SRLGISGISSILAPWMLSTLMVSGVLYLIAIMIINIFTRTELQNWLYESCWGKGLDQWGNIEAISRLESI  
LH  
KPQLSLKKIIGRNPTHSQDPGSMQWQLIVDLPSFTKNKQIGLKIKRIPYAPTFQYGFQPEKLPILVDE  
QG  
GQWVRTVNNSPRYIVTVGGTVKDGVEIELKMPFQWLNSDIDNKRYLAQGNREGDLIIRTLNDKTIREKS  
MN  
QVLVVRDNNNEQ-----

--  
-----  
--  
-----  
--  
-----  
--  
-----

>A0A1V3H5J0\_9GAMM/1-1081

MSDPISAAKCANNQDSRDPTGPCPLKGGSVGFVPVRYAFDNGYDQDDYTPIFALPKKWQGEAWIEAEYSQ  
RT  
LRQLRDGWL YVYDQDAERLDEYQVSGTKLIKLNDDSDGETSSRLNYPVKHTVYLA FSHLRWTVRLKALM  
QE  
KDQLRSAWMRELDLDYYRENMAHPHTGSLKQLGQSVIDIGEDSAPTGLFASTCTPLDEVDDLETDEQDVQ  
QH  
QHVAQKPGSTVTDYKVDLDPNEGFFIALDDRLADVSDLFLPLSQEVARQSVILKDEENMHKLQMAELTR  
ML  
AGVKLDQDEVPSSVKGDPIRELA FERHVIDYLATQRLADQERAALESNPVATVPMTSLQEEALNKGALL  
EE  
QYDYQLTEEQQRWSMFSDEVDWEALEAFLSDHYNQLQGLDARIANRYKDFMHGLKQLSTEPAIVGVDNQ  
DT  
DHLVYLLSLVSQYLVGVKHAINNEEAQAELNKVLDLDFDQPDNLLALASVGFSDKNWQALNDEVQKIEHFI  
GL  
DKPGDMLALFSAIANYGFTGDVRIQEKEWFKSLAEPVKNSFSALQHATSGAAEQTWRAITNLLFPSQMN  
TT  
HSPAGMISNLRLVILEAIVNPEAIVAHNPDYPAQVSAWQRKMNAEVAIITRISQPPVGQPTPKNHQIQTM  
HA  
AQRLQKLLSSELPQMVTLKHQAANDA AKMLNQAIERIWQKGTQAAQTSWNKLGKMGGILAILNIWNSA  
SV  
LHNIRYKAEQHPETSLWANPALREATYSTAYAVSQVAGLWRDEAWKKIITDEELLKRSLSKVLERTSSAS  
KA  
AALKTFAKTTAMVSLFGLFATGLETWDSYKKYDDL SNTPMESLGYVLKGLAAGSQAVVFLAQAVANFASR  
FG  
ILGTSIGSIIAPWMMTTLMVAGIVSLLSVLIINLVKRSLEIWLHSTWGKQTKKWDFLEDLTSLENIIN  
KP  
QIRLTAIPSRQPSQWMDAGTEQWQLELTLPAFTRDTKIGLQITRKPDKSYHYRVAQPKSAVVVNEQGGT  
WS  
TDEASGSPYRLNMGGTTDDTVAVLVSMFPAWQASEKETLGYIAVGSHQGDLLVNPAPKDKKLAKRTIEV  
RV  
Y-----  
--  
-----  
--  
-----  
--  
-----  
--  
-----  
--  
-----  
--  
-----

>A0A1E5AM92\_ALIFS/1-1094

MSEANNAAMCGSKKDMKNPAGACPVKFGVIDIIPVRYAIDDMDNEEKEQKHPLLDTHKGHGFFDVAHSKY  
TL  
RQLRDGWL YVYSNKDKTFHEYQVKGTQFIKMDWGSNEADKAPEERGQAGEAKSCLSYSKNDTVKISFSHQ  
RW  
TWRLCEHMRSNTQCRNEWMRTVDLKTYSNTLEIEHGGGMRDFVHAVADIGTPKPSDVLFEKTC SPLKADD  
PS  
DDEFHLATHKKPVLETDYQCDLLEKNSALYIALDDQLADITDLFLKLSSEVAEKAAIMGDEDKQYKLQMA  
EL  
TRTLGRVRLDENELPKEIREDPISIFQFEKELTDYLYIQDLAYEEQALPAAESVHYEPVYTPQAKVKLQE



EL  
AVVTKDVNYKAEQAGDSFYEQFKPVWREVTHASAYVVANISAIFRDKAWGEIEGNKRLLQRSLREIHFYR  
IN  
KSNVVLKEIDSIKAFKHALITSTFGLIAIGMEIWESNDKAIDSTKRLDERVGYWLKIGALAGQLTVYAG  
QF  
IISITNRYFQARWATIGSILAPWMLTTLMISGVIYLISITIIINLFRTELQNWLYESCWGKGLQWGKIE  
AI  
SRLEAILYKPKLSLKKTMGRIPHTSQDPGGMQWQLIVDLPSFTKNKYIELKIKRIPYTPTFQYGFQPEK  
LN  
PILVDEQGGQWVRTVNNSPRYVITIGGTVKDDVEVELKMPSNGSKNDIEYESHYLASGKKEGSLVIKSL  
NK  
TIKGESLRGVLLVGEENNA-----  
-----  
-----  
-----  
-----  
-----  
-----  
-----  
-----  
-----

>A0A1N6M7W2\_9VIBR/1-1100

MSNPNDVQGSRKPMNPNVGECPVKSSVMSIVPVRYALDDLEPVEYHAFKRLQNLPLKEEHWQGPLKLKE  
AQ  
YTTLRQLRDGWL YVYDETDKTFHEYQVSGSELIKIDWGSNEAESDTPDKRGSAGKSQPFLEYPSONKLYMAF  
SY  
HRWSWRVCEHMRS DSSSRHKWMRQVNLKQFCQTMKVPHCSFIDTLSEQVADIYDGEAPSDDLFGCTPL  
KK  
PKQQPDNDFPYALVAEKPATDKGSLKGMKSPSTAMYVALDDVLADITDLVMGLSYAKVEKEATLGDKEN  
IH  
KMRMAEIVRQLGRVSVPKDKMDKQIRDDITHVLACEELLNQYLLMSSLAEEDKRRLESPGYDPQEGDMPA  
SG  
AAEAAEKMKATLKDSYGLTVTPEMHEQWSRAKTYQKDVDWDGMMTYLTEQYHALKGLDEVIAARYDEVLL  
GI  
NALEDNALS VGIDTQAATDVSYLLDLTGQSLVVLKNSVTDEKRHRQLEKTF SVVSPKNLFALAGYGF SQE  
TR  
QTIDEQIQTLHKQLLSVGSAGDNLALAAALANWDALIGDGRIQDKSWYTLVQPVKDSFSALAKAVQTTA  
TH  
SWRSILDLTRPSYSNPESLIDHLRMLLMGAI VDEKAVLQVNRNYVKEMEALGKQLKPLLKGMSNLTHPET  
GA  
IVQVNKYKKIQAEIDRIIVKKQPQLLRVKGDALNEKLQOTLTEYVEKLRGGGSRVGQALKSSVEEVGGLG  
GL  
LVGLGVWNTFVVL MNLPEKLDKAETDEERYKTLL EPLYSALYTCQFAYAVSLSPVWKKISANQSLMRTSV  
NR  
VLAKKAFSVESQVLVSRFSNLMLTTASLGALASGLEAWDSYNKTS GKDNTLLETAGYWLKFGATLGNTGI  
FG  
YQLIVHIASRMGSSVAIGATLAPWMLTGLFWMGMIYLVGVV LINL FHRDDVSLFLYH SVWGKNRAGWSLQ  
EE  
LTQFEQLMYRPVRLVKIDAPDQRYASIIYAPKHQWQVEIDL PPLV NKGDTLGLQMTRTPMSSGVTNMAGS  
PV  
LINEQNGQWQRIEKDQRSLLRYSAAGGSDNDMIALLLQMPLYLWPATQKEAPEASCHLLYSTYGYNEG



>A0A1B9PQD5\_9GAMM/1-1086

MSEANNAAMCGSKKDAKNPAGACPVKFGVIDIIPVRYAIDDMDEEKEQKHPLLDHKGHGFFDVAHISKY  
TL  
RQLRDGWL YVYSNKDKTFHEYQVKGSQFIKIDWGSNEADKAPEERGQAGEAKSCLSYSKNDTVTISFSHQ  
RW  
TWRLCEHMRSNTQCRNEWMRTVDLKTYSNTLEIEHGGGMRDFVHAVADIGTPKPSDVLFEKTC SPLKDDD  
PS  
DDEFHLATHKKTVLETDYQCDLLEKNSALYIALDDQLADITDLFLKLSETYVRIVELQGTEEDEYKAQMA  
EL  
TRSLARVTFSDDQLPENIKSDPIERLKLEIEINEYLYQEONVQSSASYEYHVGEVENTSWYEALEAKK  
QA  
IKERFNFEIKKDHTSQWKKQYRNFD EIRWNELENEYLFEKYDKLSEVETLNSKLIYQHKEVTDAIEQMGID  
PM  
YFGIDNQTEVGQRYLSELFSPITVELVQSGFNVPEIKHYLEKMLDLSNPNNLLALAPFAYSKEVVDELTT  
YS  
EGGAALNMSSPSDMIALHTRLSEFDTLTGDVRIQSDWYKLLHIDIKAVFAAFIASNKANPILQFRPSME  
ML  
NAIQPRTNQFSALSFMTRFRVLIMENLADSSFIVSVNPNYPKELAAFNKKYDQFLLSNSKTMAAIIIRKEQ  
FA  
AVLVQKASEFISENMPQMLKVSQNGSMLNIKGAISKGVAESWAAYKNTKADLVSFSEKWKGSASWNGVV  
AA  
LNIWNSITVFSNLLQRNQESKTTEEYKSVA AEVVYASWTVNACALVSRDASWVEVMKDKLLNKNRYIA  
LK  
SNKELITKFINLTKLVAVTGLIASVSEIYYVYKRLDSPLLSKEERMAEILKSGSLVGPFIYSIQLISCF  
MN  
GSIGAI VAPWMVIGLVIFGVIYIAATVFINMFKRTMELWL VQSIWGVKTAKWSPEIELVKLQNILNKPV  
VQ  
IDTGIVRTYQSSNDSKQWTLTIDL PDYLSDKWFGIKVIKSTSKKVIKHYNFIGNKETSQSEVEANFTKV  
SN  
DNNCYQMKIERNHSEVISNITIYLDVLANRTSHVISYSGFQSGDGDV KLNINKIISFNDYSKKENLGMDI  
VG  
LNNANS-----  
--  
-----  
--  
-----  
--  
-----  
--  
-----  
--  
-----  
-----

>Q5E5H0\_ALIF1/1-1086

MSEENNAAKCGNKKDAKNPAGSCPVKFGVIDIIPVRYAIDDMDEEKEQKNPLLDTHKGYGFFDVAHISKY  
TL  
RQLRDGWL YVYSNKDNTFHEYQVKGSQFIKMDWGSNEADKAPEERGGKAGEAKSCLSYSKNDTLTISFSHQ  
RW  
TWRLCEHMRSNTQCRNEWMRTVDLKTYSNTLEIEHGGSMRDFVHAVADIGTPKPSGILFEKTC SPLKDDD  
SS  
DDEFHLATHKPKVLETDYQCDLLEKNSALYIALDDQLADITDLFLKLSETYVRIVELQGTEEDEYKAQMA  
EL  
TRSLARVTFSDDQLPEHIKSDPIERLKLEIEINEYLYQEONVQSSASYEYHVGEVENTSWYKALEAKK



AA  
LNIWNSITVFSNLLQRNQESKTTEEYKSVAAELVYTASWTVNACALVSRDAAWAEVMKDKRLLLELQRKQA  
LK  
ANKKLITKFVNLTRLVAVTGLIASVSEIYYVYKRLDSPLLSKEERIAEKLLFALGGQVVVFSVQLISCF  
MN  
GTIGAI FAPWMVIWLSVFGIAYIAATAFINMFKRTDMELWL VQSIWGVKTAKWAPEIELVNLQNILNKPV  
AQ  
IDTGIVRTYQSSSDSKQWTLTIDLPDYLSDKWFGIKVIKSTSSKKAIKHYNFIGNNEVNQSEVEVNFTKV  
NN  
DNNCYQMKIERNHSEDISNITIYLDVLANRTPHVISYSGFQGGSGDINLSINKITSFNDYSKYANLGMKI  
VR  
LNNANS-----  
--  
-----  
--  
-----  
--  
-----  
--  
-----  
--  
-----  
--  
-----

>A0A2S7XDB4\_9GAMM/1-1088  
MSEANNAAMCGSKKDAKNPAGACPVKFGVIDIIPVRYAIDDMNREEKEQKHSLLDTHKNGFFDVAHSKY  
TL  
RQLRDGWL YVYSNKDKTFHEYQVKGTFIKMDWGSNEADKAPEERGKAGEAKSCLSYSKNDMVTISFSHQ  
RW  
TWRLCEHMRSNSQCRNEWMRIVDLKTYSENTLEIEHGGMRDFAHAVADIGTPKPSDTLFGKTC SPLKDDD  
PS  
DDEFHLATHKKPVLETDYQCDLLEKNSALYIALDDQLADITDLFLKLSETYVRIVELQGTEEDEYKAQMA  
EL  
TRSLARVTFSDDQLPENIKSDPIERL KLEIEINEYLYQEONVQSSASYEYHVGEVENTSWYKALEAKK  
QT  
IKERFNFEIKKEHTSQWKRQYRNFDEIRWNELENEYLFEKYDKLSEVEILNSKLVYQHKEVTD AIEQMGID  
PM  
YFGIDNQTEVGQRYLSELFSPITVELVQSGFNVPEIKHYLEEMLDLSNPNNLLALAPFAYSKEVVNELTT  
YS  
EGGAALNMSSPSDMIALHTRLSEFDTLTG DVRIQSDWYKLLHIDIKAVFAAFIASNKTNPILQFRPSME  
ML  
NAIQPRTNQFSALSFMTFRV LIME NLADSSFIVSVNPNYPKELAAFNKKYDQFLLSNSKTMAAIRKEQ  
FA  
AVLVQKTSEFISENMPQMLKVSQNGSMVNVKGAISKGVAESWAAYKNTKADLV SF SERKWKGSASWNGVV  
AA  
LNIWNSITVFSNLLQRNQESKTTEEYKSVAAEVVYTASWTVNACALVSRDAAWAEVMKDKRLLKLQRNKA  
LV  
SNKKLITKFVNLTRLVAVTGLIASVSEIYYVYKRLDSPLLSKEERMAEILKSGSLVGQAFIYSTQLISCF  
MN  
GTIGAI FAPWMVIGLVIFGVIYIAATVFINMFKRTDMELWL VQSIWGVKTAKWAPEIELVNLQNILNKPV  
AQ  
IDTGIVRTYQSSSDSKQWTLTIELPDYLSDKWFGIKVIKSSSKKAIKHYNFIGNNEVNQSEVEVNFTKV  
NN  
DNNCYKMKIERNHSEDISNITIYLDVLANRTPHVISYSGFQGGSGDINLNININKITSFNDYSKNTNLGI

EI

VRLNNANS-----

--

-----

--

-----

--

-----

--

-----

>B5FDW7\_ALIFM/1-1085

MSEENNAAKCGNKKDAKNPAGSCPVKFGVIDIVPVRYAIDDMDEEKEQKHPLLDTHKNGFFDVAHSKY

TL

RQLRDGWLYVYSNKDKTFHEYQVKGTQFIKIDWGSNEADKAPEERGQAGEAKSCLSYSKNDTVTISFSHQ

RW

TWRLCEHMRSNTQCRNEWMRTVDLKTYSNTLEIEHGGGMRDFVHAVADIGTPKPSDVLFEKTCSPDKDDD

PS

DDEFHLATHKKPVLETDYQCDLLEKNSALYIALDDQLADITDLFLKLSETYVRIVELQGTEEDEYKAQMA

EL

TRSLARVTFSDQLPEHIKSDPIERLKLIEINEYLYQEONVQSSASYEYHVGEVENTSWYKALEAKK

QA

IKERFNFEIKKEHTSQWKRQYRNFDEIRWNELENEYLFEQYDKLSELETLNSKLVYQHKEVTDIAIEQVGIN

PM

YFGIDNQTEVGQRYLSELFSPITVELVQSAFNVPEIKHYLEKMLDLSYPNNLLALAPFAYSKEVVDELTT

YS

EGGAALNMSSPSDMIALHTRLSEFDTLTGDVRIQSDWYKLLHIDIKAVFAAFIASNKANPILQFRPSME

ML

NAIQPRTNQFSALSFMTRFRVLIMENLADSSFIVSVNPNYPKELAAFNKKHDQFLLSNSKTMAAIIIRKEQ

FA

AVLVQKTSEFISENMPQMLKVSQNGSSLNIKGAISKSVVESWAAYKNTKADLVSFSEKWKGSASWNGVV

AA

LNIWNSITVFSNLLQRNQESKTTEEYKSVAAEVVYASWTVNACALVSRDAAWAEVMKDKRVLKLRKQA

ID

INKKLITKFVNLTRLVAVTGLIASVSEIYVYQRLDSPLLSKEEVLAEKLVISLIGQAGIFTTQLISCF

MN

GSIGAI FAPWMVIWLSVFGIAYIAATVFINMFKRTDMELWLVQSIWGVKTVKWSPEIELVNLQNILNKPV

AQ

IDTGIVRTYQASTYSKQWTLTIELPDYLSNKWFGIKVIKNSKKAIKHYNFIGNKEMSQSEVEVNFTKV

SN

DNCYEMKIERNHSEDISNITIYLDVLANRTPHVISYSGFQGGSGDIKLVNKNVTSFNDYSKKENLGMEIV

RL

NNANS-----

--

-----

--

-----

--

-----

--

-----





---  
-----  
---  
-----  
---  
-----  
---  
-----  
---  
-----  
---  
-----  
---  
-----  
---  
-----  
---  
-----  
---  
-----  
---  
-----  
-----

>A0A433G6Q4\_9GAMM/1-1059  
MSTPNQAAQCANTTDSKSPAGVCPLKNKIAIIPVRYALDEPFSPQKQPHPVPAGAGFVPLKLKESGY  
AL  
RQLRDGWL YVYDEKTKTFDEYEIKGSTFINQSKGSKGHLLYPASHTLSLAYSPQRWTGRIKHEMEKSGGL  
RT  
TWMRQVKLGSFASTMKAPHCGLPDVLDKVADLGMSNKG FVLSSTPLAKPAEEDKQGIKLLAHKPASLPTA  
YK  
AGIPDPKSAMVVALEDPLADLADLSMKVNQLLAKREALLGKDDATIKVNSHKLMMAEVTRNLARVRLDEK  
EL  
PASVRGNVARTQAFEEALDDYLGDRYLADMESMTAEPGMVRINSPMEKRADEKLKILREQYGFNPSQKQV  
SQ  
WKERAAFQDEVNWSGLNAFIKQYQVPLNELDLALTRAHEDLFNGVTRLKADPLPFGLDNRTPKGQAYLQT  
LF  
AEAGPVL SLSCRTEERKKALEKLLGEKSRDNL LALAPYGFDAALHKGLSELTVDNAWLSTSSGDITALFG  
RT  
ADLETL LGDERFKQKSWFQTIEAVIEAMKVAGKSMAGAHQAQIMAAILPHAWKNSLAGNLRLLVLESLLG  
DQ  
PLQVNRDYRMLHNRFFQKVWIIIVKEMSAISSPPPGRSTTVKAINS QLKTLLQQQLDTLIASEMPLLVKLKG  
DL  
YQQARQYVGDY LASVRSGVNQRITAMNERIPNLATFGGLVALLNLWNLT VVIAGTAQNAQSIGRERANL  
QL  
GSFAWTGN AIAALYQGAWEK LKPLTTDGGKRALTAISIKAAIKEGEHAVVRSFAWRMVAFSSLGMAA  
AG  
AEMWDTFQASKDPLISSMEKTLLQMKAGVLLGQGIIFGAQLFYLLGNLGFSSVAAIFAPWMLVGLFVLG  
AA  
YLVLTVLLNIFKRSDLEK WLLQSTWGKQPANWSTEDELARFEMLVNKP GASLTVVRTAPQGWMDTGRSQW  
QL  
QLSLPAHLRGQTI GLNVTSQPLASAGQMIPARSKQELDRYLAAMKPKMIETLRGRWDDMVYSLPLGVDTN  
SA  
IKLELGYLGGMIQREFIFKGSNSSGPVTLNGSSGDLGTM PALVVGKQGNK-----

---  
-----  
---  
-----  
---  
-----  
---  
-----  
---

>W0A2C7\_AERHY/1-1060  
MSTPNQAAQCANTTDSKSPAGVCPLKNKIAIIPVRYALDEPFSTPQKQPHVPAGAGFVIPLKLKESGY  
AL  
RQLRDGWLIVYDEKAKTFDEYEIKGATFISQSKGSKGHLLYPASHTLSLGYSPQRWTGRIKNEMEKSSGL  
RS  
AWMRQVKLGSFASTMKAPHCGLPDVLDKVADLGMVKNKGFVLSSTPLAKPAEEDKQGIKLLAHKPACSPAA  
YK  
AGILDPKSTMVVALEDPLADLADLSMKVNQLLAKREALLGKDDATIKANSHKLMMAEVTRNLARVRLDEK  
EL  
PASVRGNVARTQAFEEALDDYLGDRYLADMESMTAEPGMVRFNSPMEKRADEKLQILREQYGFNPSQKQV  
AQ  
WKERAQFQDEVNWSGLNAFIKQYQVPLNELELALTRAHEDLFNGVTRLKADPLPFGLDNRTTRGQAYLQA  
LF  
AEAGQVLSLSCRTEERKKALEKLLGEKSRDNLALALYGFDAELHKGLSEQTVDNAWLSTSSGDMTALFG  
RT  
ADLETLGDERIKQKPFQKVEAVIGAMKEAGKSMAGHAQIMAAILPHAWKNSLAGNLRLLVLESLLG  
DQ  
PLQVNRDYRMLHNRFFQKQVWIIIVKEMSAISSPPPGRSTTVKAINQKTLQQLDTLIASEMPLLVKLG  
DL  
YQQARQYIGDYLASVRSGVSQRITAMNNIERNLNLATFGGLVALLNLWNLVVIAGTAQNAQSIGRERA  
NM  
QLGSAFAWTGNAIAALYQGAWEKLPKPLAAQDGNPLRSLSIKNAIKEGDHAVLVKAFTRMVAFSSLGLA  
AA  
GAEMWDTLQASKDPLISSMEKTLQMKAVVLLGQGGIFFTQLVFLGINGLGGSSIAAIFAPWMAVGLFVL  
GA  
AYLVLTVLLNIFKRSLEKWLQSTWGKQPANWSAEDELARFEILVNKPGASLTVVRTAPQGWMMDTGRSQ  
WQ  
LQLSLPAHLRGQTIGLKVIGQPIARAGQMIIPARSKEELDRYLAMKPKVIETLRGRWDDMVYSLPLGVD  
NS  
AIKLELGYLGGMSQREFIFKGSSTSSGPVTLNGSSGDLGTMALVVSKLGNN-----

---  
-----  
---  
-----  
---  
-----  
---  
-----  
---





QL  
GSALAWTGNAIAALYQGAWEKLPKPLTADGGKRALTAISIKAAIKEGEHAVVVKAFSLRMLAFSSLGLAA  
AG  
LEALDSWQASQDPLISGMEKTLQMKAGVLFQGGIFLIQLAYLGVNSLGFSSVAAIFAPWMVVGLFVLG  
IA  
YLALTVLLNIFKRSDLEKWLQSTWGKQPANWSAEDELARFEQLVNKPGASLTVVRSAPQGWMDTGRPQW  
QL  
QLSLPAHLRGQTIGLKVIGQPLARAGQVVPARTKEDLDYHAAMQPKVIETQRGRWDELVIILLGVDTN  
SA  
IKLELGYLGGMVQRQFIFKSGNSNGPITLDANQGELNSMPALVVGKQGNK-----

-----  
-----  
-----  
-----  
-----  
-----  
-----  
-----  
-----

>A0A1C7PRV7\_9GAMM/1-1059  
MNTPNQAAQCASPNSKSPAGVCPLKNKNVAIIPVRYALDEPFAPPQKQPHPLPAGAGFVAPLKFESGY  
AL  
RQLRDGWLIVYDEKAKTFDEYEIKGATFISQSKGSKGHLLYPASHTLSLIYSPQRWTGRIKKEMEKSSGL  
RS  
AWMRQVKLGSFASTMKAPHCGLPDSLDKVTDLGLPNQGFVLSCTPLAKPAEEDKQGIKLLAHKAAGSPAA  
YK  
AGMPDPQSAMVVALEDPLADLADLSMKVNQLLAKREALMGKDKLHKANTHKLMMAEVTRNLARVRLDEK  
DL  
PASVRGNVARIQAFEEALDDYLGDRYLADTEKMTAEPGMVRFDSMAKRADAKLKILREQYGFNPESHKQV  
SQ  
WKERAAFQDEVNWTGLNAFIKQYQVPLNELELALSRAHEDLFNGVTRLKADPLPFGLDNRTAKGQAYLQL  
LF  
AEAGQALSLSLSCSTEARKKALEKRLGEKSSDNLLALAPYGFDAALYKGLSEQTVDNAWLSTSSGDMTAFSS  
RI  
GELEALLGDEKQKQKQPFQTV EAVIDAMKAAGKSLAKGAHAQIMAAIIPHAWKNSLAGNLRLLVLESLLS  
DK  
PLQVNSGYRMLEKSFQQRVWSIAKEMSAISSPPPGRNTTVKAINS QLKTLQKLDALIASEMPMLVKLKG  
DL  
YQQARQYIGDYLASVRTGVSKGITAMNDKVPNLGSFGGLVALLNIWNLTVVIGGMVQNAQSVGRLRANM  
QL  
GSFAWTGNAIAALYQGATWEKLPKPLAAQDGNPLRSLSIKNAIKEGDHAVVVKAFSTWRMVAFSSLGMAAA  
GA  
EMWDTLQARKDPLISSMEKTLQIKAGVLAGQGAIFFIQLAYLGANGLLGFSSIAAIFAPWMAVGGFFVLG  
AA  
YLVLTMLLNIFKRSDLEKWLQSTWGKQTANWSVEDELARFELLVNKPGASLTVVRSAPQGWQDTGRAQW  
QL  
QLSLPAHLREQTIGLSVISQPLAKAGQMVPAQPPEALATYLAAMKPKVIETQCGRWDELTYLPLGVDTD  
SA  
IKLELGYLGGMVQRQLIFKGRGNSNGPITLDANQGELGMPALMVVGKQGNK-----

-----  
-----  
-----  
-----  
-----  
-----  
-----  
-----

>A0A3R5MUL2\_9ZZZZ/1-1059  
MSTPNQAAQCANTTDSKSPAGVCPLKNKIAIIPVRYALDEPFSPPQKQPHVPAGAGFVVPLKLGESGY  
AL  
RQLRDGWLIVYDEKAKTFDEYEIKGAI F ISQSKGSKGHLLYPASHTLSLVYSPQRWTGRIRKEMEKSCGL  
RS  
VWMRQVKLGSFASTMKAPHCGLPDVLDKVLADLGM SNKGFVLSSTPLAKPAEEDKQGIKLLAHKPAGSPAT  
YK  
AGIPDPKSAMVVALEDPLADLADLSMKVNQLLAKREALLGKDDATIKVNSHKLMMAEVTRNLARVRLDEK  
EL  
PASVRGNVARTQAFEEALDDYLGDRYLADIENMTAEPGMVRFNSPMEKRADAKLQTLREQYGFNPSQKQV  
SQ  
WKERA AFQDEVNWSGLNAFIKQYQVPLNELELALTRAHEDLFNGVTRLKADPLPFGLDNRTTRGQAYLQT  
LF  
AEAGQALSLSCRTEGRKKALEKLLGEKSRDNL LALAPYGFDAELHKGLSELTVDNVWLSTSSGDM TALFG  
RT  
ADLETL LGDERFKQKSWFQKVEAVIGAMKEAGKSM AKGAHAQIMAAILPHAWKNSLAGNLRLLVLESLLG  
DQ  
PLQVNRDYRMLHNR FQKQVWIIIVKEMSAISSPPPGRSTTVKAINGQLKTLQQQLDTLIASEMPLLVKLKG  
DL  
YQQQARQYIGDYLASVRSGVSQRITAMNNI ERV PNLATFGGLVALLNLWNLTVVIDGAAQNAKSVGQSRA  
SM  
QLGSALAWTGN AIAALYQGAVWGEIKQLRAGEKALTSISIKNASIGEHA AVVKS FSLRMLALSSLGIVAA  
GL  
EAWDSALASQDPLISGIEKSLLVAKTIVLGGQAAIFGAQTFIALGSMGGTSITIGAVFAPWMIISL FVLG  
FA  
YLFLVMLLNIFKRSELEK WLLQSTWGRQPANWSAEDELARFELLVNKPGASLTVVRSKPQGWMDTGRPQW  
QL  
QLSLPTHLRGQTIGLNVTSQPLASAGQMIPARSKQELDRYLAAMKPKMIDTLRGRWDDMVYSLPLGVDTN  
SA  
IKLELGYLGGMIQREFIFKGS SSSSGPVTLNGDSGELDTMSALVVG NRENK-----  
-----  
-----  
-----  
-----  
-----  
-----  
-----



SQ  
WKERAAFQDEVNWIGLNAFIKQYQVPLNELGLALTRAHEDLFNGVARLKADPLPFGLDNRTTQGQAYLQT  
LF  
AEAGPVLSLSCHTEERKKALEKLLGEKSRDNLALAPYGFDAALHKGLSELTVDNVWLSTSSGDMTALFS  
RI  
AELETLGEGRLKQKPFQKVEAVIGAMKEAGKSMAGHAQIMAAILPHAWKNSLAGNLRLLVLESLLG  
DQ  
PLQVNRDYRMLHNRFFQKQVWIIVKEMSAISSPPPGRSTTVKAINGQLKTLQQQLDTLIAEMPLLVKLG  
DL  
YQQARQYVGDYLASVRSQVNQRITAMNERIPNLATFGGLVALLNLWNLTVVIAGTAQNAQSIGRERANM  
QL  
GSAFAWTGNAIAALYQGAAWGEMKQLRAGEKALTSISIKNASIGEYAGMVKSFSLRMLAFSSLGVVAAGL  
EA  
WDSALASQDPLISGIEKSLLVAKTIVLGGQAAIFGAQTIIALGSMGGTSITIGAVFAPWMIISLFLVLF  
YL  
FLVMLLNIFKRSDLEKLLQSTWGKQPANWSAEDELARFELLVNKPGASLTVVRSKPQGWMDTGRPQWQL  
QL  
SLPAHLRGQTIGLNVTSQPLASAGQMIPARSKQELDRYLAAMKPKMIETLRGRWDDMVYSLPLGVDNTSA  
IK  
LELGYLGGMIRREFIFKGSSSSSGSVTLNGYNGELDTMSALVVGRENK-----

--  
-----  
--  
-----  
--  
-----  
--  
-----  
--  
-----  
--  
-----  
--  
-----  
--  
-----  
--  
-----  
--  
-----  
--  
-----

>A0A2R7PWZ9\_9GAMM/1-1059  
MNTPNQAAQCASPNNKSPAGVCPLKNKNIAIVPVRYALDEPFAPLQRQPHPLPAGAGFVAPLKFESGY  
AL  
RQLRDGWL YVYDEKAKVLDEYEVKEATFISQSKGSKGHLLYPATHLSLIYSPQRWTGRIKKEMEKSSGL  
RS  
AWMRQAKLGSFASTMKAPHCGLPDSLQKVDLGLPNQGFVLSCTPLAKPAEEDKQGIKLLAHKPAGSPAA  
YK  
AGMPDPQSAMVVALEDPLADLADLSMTVNQLLAKREALMGKDEKLRKANTHKLMMAEVTRNLARVRLDEK  
DL  
PASVRGNVARTQAFEEALDDYLGDRYLADTENMTAEPGVVSFDSPMEKQADAKLKILREYGFNPSHKQV  
SQ  
WKERAAFQDEVNWTGLNAFIKQYQAPLNELALALARAHEDELLNGLTRLKANPLPLGLDNCTAEGQAYLQT  
LF  
AEAGQALSLSAEDNKKALEKLLAEKVSNDNLALAPYGFDAALHKGLSEQTVDNAWLSTSSGDMAALFG  
RT  
ADLEALLGDEKQKPFQKVEAVIDAMKEAGKSLAKGHAQIMAAILPHAWKNSLAGNLRLLVLESLLG  
DQ  
PLQVNSGYRMLFKSFQQRGWLIVKEMSAISSPPPGSNTTVQAITGQLQSLQKLDVLIAREMPMLVKLG  
DL  
YQQARQYIGDYLASVRSQVNQRITAMNERVNLATFGGLVALLNLWNLVSVVIAGTAQNAQSVGRVRANI

QL  
GSAFAWTGNAIAALYQGAAWGQLKPLVLEDGRLLRSLPIKEVIKDVDHGALVKTFSLRMLAFSGLGMAAA  
GA  
ELWDTLQASKDPLISDIEKTLLQMKVGVGGQIVIFFAQFAQLGINGLLGYSSIGAICATWMGIGFFVLG  
AA  
YLVVIVLLNIFKTSLENWLRQSTWGKQPAGWSAEEELARFELLVNKPGASLSVVRTPPQGWMGTGRPQW  
QL  
QLSLPAHLRGQTIGLKVISQPIAKAGQMIPARSKEELDRYHVSMQPKVIETLRGRWDELVYTLPLGVDTN  
SA  
IKLELGYLGGMIIQREFIFKGSSSSSGPITLETSSGGLGAMPALMVGKQGNK-----

-----  
-----  
-----  
-----  
-----  
-----  
-----  
-----  
-----

>A0A2M8HEZ6\_9GAMM/1-1057  
MSSPNQAAQCASTTNGKSPAGVCPLKNKIAIIPVRYALDEPFSPPQKQSHVPVAGAGFVPLKLKESGY  
AL  
RQLRDGWL VYDEKAKTFDEYEIKGATFISQSKGSKGHLLYPASHTLSLIYSPQRWTGRIKKEMGKNSSL  
RS  
GWMRQVKLGSFASTMKAPHCGLPDVLDKVADLGMPNKG FVLSSTPLAKPVEEDKQGIKLLAHKPAGSPAA  
NK  
AGIPDPKSALVVALEDPLADLADLSMKVNQLLAKHEALLGKDDATIKANSHKLMMAEVTRNLAKVRLDEK  
EL  
PASVRGNVAKTQAFEEALDDYLGDRYLADMENMTAEPGMAMFSSPMEKRADAKLKILREQYGFNP SHKLV  
SQ  
WKERAAFQDEVKWSGLNTFIKQYQVPLNELELALTRAHEDLFNGVTRLKADPLPFGLDNRTDKGQAYLQV  
LF  
AEAGQALSLSRTEARKKALEKLLGEKSSDNLLALAPYGF DIALYKGLSEQTVGNTWLSTSSGDMTAFSS  
RI  
GELEALLGDERLKQKSWFQAVEAVIEAMKVVGKSMAGHAHQIMAAILPHSWKNSLAGNLRLLVLESLLG  
DQ  
PLQVNRDYRMLHSRFQQKVWIIIVKEMLAISSPPPGRSTTVKAINGQLKTLQQQLDTLIASEMPMLVKLKG  
DL  
YQQARQYISDYLASVRSGVSQRITAMNERV PNLATFGGLVALLNLWNLTVVIGGTAQNAQSIGKERANM  
QL  
GSAFAWTGNAIAALYQGAVWEKIKISSAGDKALTSLSIKA AKDGEHGVLVRAFSLRMLAFAGLGMAAAGA  
EM  
WDTLQATHDPLISGMEKTL SQMKMGVLGGQFFIFFAQIVQLGINGLLGYSSIGAICATWMGVGFFVLGAA  
YL  
VLTVLLNIFKRSDLEK WLLQSTWGKQPANWSAEDELARFEMLVNKP GASLTVVRTAPQGWRDTGRAQWQL  
QL  
SLPAHLRGKTIGLNVIQPLAKAGQMVPAQPPEALATYLAAMKPKVIETQRGRWDELVYTLPLGVDTN SA  
IK  
LELGYLGGMIIQREFIFKGSSSSSGPVTLNGSSGDLG TMPALVVGKLGNN-----









-----  
-----  
-----  
-----  
-----  
-----  
-----

>A0A2S2CH27\_9GAMM/1-1036  
MPSDAYNSAEIAGTKSPSSPAGTCPLQTKEVGIIPVRYAIDATMGTKALFPLPEGDDWQPTFNINLPYTL  
RQ  
LRDGWLYVYSKKQKVLHTYQIENAVFTAQHEGGTCAACLTYSDDTLWLSYSHQRWTSRLIELFSTEKKY  
RE  
QWMRKLNIQAFRLNMRGPHAGMAKKLESSVADIGSVTQDIINGFAITSTPLNADDTESNSGFENKAKPA  
NP  
ASTYQVTLPESNVGNGLFIALEDPLADITDIALKLGSLHAQKEMVFGSDEDKHKQLISEFVRSIARVSYD  
PK  
TAPEALKTKLKNPQEVLFESVLNQYLRYSPLNQAQYGSEAYAANALPYDQPRQEAQSILNNTYHYTP  
TD  
KDFEHFESRKNIDLVDWDKMSIFLDKKYAKLKAIEGDAATMLAELNRAFKDLGVYAARVGV DIEETQGG  
LY  
LNTFFGHLFPLMAAVSQKWDAEEETLLALAPFYYSPEFSKAINKAI PNDALSVTNASDMTNMVSRLGET  
IG  
FIYDGRIPESDEATKALITRVIQAAKNAITTAGDHVWDGLMDGLFPHQVSGESGLD SGLRLMVARSLVSK  
EG  
KLLISSDYVSKFDSFSDKLNPLLQKAEQLSGRLHANSTTAMRNNLNEIKEKIAKLI ADEMPLLIKFEQEA  
MN  
NAVREKLAASMSRFTSTVGKTLDNVNGVGT VVGGFAAICNLWNLWAVSQQVTSKLNANSTQE QADVYIE  
MA  
SALSWTL SAFAGVGRDAQVIASKFVEMTVKDAITKTASNLNQQVVIKRFVAAAKVTAIFGLFAASTEIYL  
TG  
RQWQQSDDT FEQALLIGKMGSLAAQGAVSAFQLARVLGSTALLGEIIAAMVSTLFYAGIAYLLFSALYN  
YF  
HRDEMQTWLQNGSWGKSPKPQTLEQELMALENI IWKPKIELTKNSVDIYLP SYLLDDEKKHFDLQIVVHE  
KI  
NSIYVSMYHHSNETLKSTLIDVSQAKRKNTANGVGYISIPVPHNEGDEVIIA INYDRAWTDECQSYVGTR  
SS  
AGTFDLERTKDVVSKRHGVAGLRLPVAG-----

-----  
-----  
-----  
-----  
-----  
-----  
-----

>A0A1X9U0H6\_PH0DD/1-1043

MPSDAYNSAEIAGTKSPSSPAGTCPLQTKVGIIPVRYAIDATMGTKALFPLPEGDDWQPTFNINLPYTL  
RQ  
LRDGWLYVYSKKQKVLHTYQIENAVFTAQHEGGTCAACLTYSDDTLWLSYSHQRWTPRLIELFSTEKKY  
RE  
QWMRQLNIQAFKLNMRGPHAGMAKKLESSVADIGSVTQDIINGFAITSTPLNADDTESNSGFENKVKPV  
NP  
ASTYQVTLPESNVGNGLFIALEDPLADITDIALKLGSLHAQKEMVFGSDEDKHKQLISEFVRSIARVSYD  
PK  
TAPEALKTKLKDNPQEVLFKESVLNQYLRYSPLNQAQYGSEAYAVNALYDQPRREAQSILNNTYHYTPT  
DK  
DFEHFESRKKNIHDVWDKMSIFLDKKYAKLKAIEGDAATMLAELNRAFKDLGIYAARVGV DIEETQGQL  
YL  
NTLFGHLFPLMAAVSQKWDAAEEETLLALAPFYYSPELSKAINKAIPNDALSVTNASDMTNMVSRLGESI  
GF  
IYDGRIPESDEATKALITRVIQAAKNAITTAGDHVWDGLMDGLFPHQVSGESGLDSGLRLMVARSLVSKE  
GK  
LLISSDYVSKFDSFNDKLNPLLQKAEQLSGQLYANGTTAMRNNLNEIKEKIAKLIADEMPLLIKFEQEAM  
ND  
AVRGKLAASIRGLRSRFTSTVGQAVDNVNGVGTVVGGFAAICNLWNLWAVSQVTSKLNANSTQDQADV  
YI  
ELASALSWTLSAFAGVGRDAQVIASKFVEMSVKSALAESANNLNQQMVIKRFAAAAKATAIFGLFAASTE  
TY  
LTIRQMFKSDSFFEQMLLVGKAGALVVQGGVSFAQLAYITTDVAIGGIVAAMMVSTLFYAGIAYLLFSAL  
YN  
YYHRDEMOKWLLHCAWGKSPKPQTLEQELTALENIIWKPNIELTKNSVDIYLPSYLLDDDKKHFDVQIVT  
KN  
KYENANLSYASPEEIRRCKEQFEPKQIDVSKARRKNTANGVGYISIPVLHNEGDEIIIAINYDRAWTEEC  
QS  
YVGTRSSGTGFDLERTKDVVSKRHGVAGLTLPVAG-----  
--  
-----  
--  
-----  
--  
-----  
--  
-----  
--  
-----  
--  
-----  
-----

>A0A1T5HY29\_9GAMM/1-1040

MSSDAYNAAEIGGSASPSSPAGACPLQATEVGIIPVRYAIDGSMGEKPSYSLPDGTHWKPTFKLHQHYML  
RQ  
LRDGWLYVFSEKLVHTYKIEGEIFTAQHDGGTCSSCLTYSDDTLWLSYAHQAWTPRIVTLFSNEEKY  
RN  
KWMRPLNISAFKRRMNGPHAGMAKNLESSVADIGSVSQDIINGFSITSTPLKADTSTSEGEFSRTKTAIT  
AP  
TYQAALPNANVNDGLFIALEDPLADITDIALKLGTFQAQKEYIFGSDDTKHKLLMSEFTRSIARVPYDPK  
TA  
PMALKSKLKDSPLETLKFEAALNEYLRYPFKQTPYGSEANAVNALSSSETVRSALNTLQNTYGYTPTD

KD  
IEHFKSREKNIGEINWELMSTFLTNKYNDLDKLEGEAAPLIEDLDNALISLGEDALRVGIDIESEQGQSF  
LN  
QLFSQLFSLMTSVSKEWKAAQKQSLALAPYYYYSPEFQSVIHTQISNDAVSFSSSSDITNMASRVGESYG  
LL  
VDGRIPDTDDAIKATLVAAKSAFSKASSAWKGLMDSLFPYHFSGKNGLASGLQLIVARSLVSKENKIQI  
SS  
DYSTQLAKFNKLTLPFLQQAERQSGQLHSQNTTAMRNALAKTKQQIANHIAQEMPLLITFETEAMNTAVR  
EK  
LTASIVGLRSRIGQSMESINGAGTVIGGFAAICNLWNLVSVSKQVVS KLNSASSTQEQADVYIELASTIS  
WT  
LSAFAGVGRDAQVIPKTLIEKSVREAIGSASNIEQQVVIKRFVAAAKVTAIFGLFAASSEAYLTVKQIQK  
SD  
DFFEQIILT SKGLALGLQGYVSGYQLVNFVRGAVLSEIVAAMMISALFYAGIAYLIFSGLYNYFHRNEMQ  
KW  
LQGSTWGNPKTQTPEQELMELENIWKPKIELTKKNVDIYLP SYLFDDEKQHYDLQIVVQKSKNINLS  
YA  
PPHVIQEEMNKPRKVMIDVSQAKRKTANGVSYIAVPVTHDEGDTVVIAINYDRAWTHNCQSYAGRLNKT  
GT  
FDLEKTKDVIIAPNGVAGIKLPTTGETNENTR-----  
--  
-----  
--  
-----  
--  
-----  
--  
-----  
--  
-----  
--  
-----  
--  
-----  
--  
-----  
--  
-----

>A0A137S7F3\_9GAMM/1-1180  
MSDKSSVYTVVSGDNLTLIARRFGFRNYQTIYDHELNSEFKKSRPNPNIHHPGDEIIPNKVMKTVPAAE  
GK  
VQVYRLVKEKQIPSSGGQQIGILPVRYAFSDKMAESLDEEREQLDSTGTNLESGLMSSGMRDYTLRQLRD  
GW  
LYVYNDTKSELDEYQITGSTYTKYEWDTIDQHATSQAGDAKSILLYNTSDKLTIAFAPLRWTRVCEHMS  
ND  
AGSRDAWMRQLNVSDYKVAPHTANITKLSLVADVDIEGEETFNNTCTPLSYPELEGNDGLVSHKAASST  
EV  
DHTVDLPENTAAIIVALDDSLADV KDLYIALAQPYARHSLVMGSTEEEEVAENTR KWEMAQFTKSLARVQL  
SG  
DELPSKIKDNP KLSKFNIDFNEYLNRVEAKNAYSQTYAATQDMLGTVGQKYDDKIVESKNKLLAKYNFE  
ST  
GKQDLDFIAQQKNKYQDEVRWDELDAFCDDIEPKLKVNPLIKQAHQDLLVSLQVIGIDAMKLGFDVENT  
ES  
MIYLLNLSNALTSMLMLTTLDEDGGACKSFLTQQSPDNLLSLTTFCFSTEYKKEFEERMSLFRELKTET  
DS  
GNYSFARSAANGSLWVGRFSEIDTLMGFNVAGAQQSTWYPLVQSAIQRTFSAFKEAAKGAASSAWGSLQT  
SL  
FTNALPSIVSKNVNDSIIHHLRLGLLSNAIEENSIILNEQFDIKMKQFNADLDAIDNRLKPLLRSKANLN

SN  
KNTSGKNSFYAKKFKKEAIDIEIEKLVNQKHIHIENKPDLLVFENEKMKQIDVISSQSTAELAGTEVAK  
RT  
QKAQVIYEKYGATSPGLAMLNFVNLLYKAEDYANSYDYLDDKQKSRINKDLASTFFWTASSISDVFRGVH  
WA  
QVQNQGETLLALSREAVSHDYGALVKRFSISMGTMAGFGLVAAGVEAWMTWDDIDDAGSELEDSLLWG  
KL  
GALAVQGGVFSVQSVRWLLSQFGSRALGTIFLPWMTAVLAVSGIVYLIVSVVLGIIQKTPLEIWNKSTW  
GK  
RQNIWTAEQELLEVDKIVRKPVEITMLVEKETAAQKMGYGREPNKKRLVIFVPGVKPNDEVDVGIKHSY  
SY  
VSTSTRIRDISDIPAVASLTDDLNQGTWTEQDGLWQYSVDVVVEAERDSFNVDIVVPAGDSEIEYKATG  
SE  
GSLTVHVQDQVTIESSNLFTSRVGHHE-----  
--  
-----  
--  
-----  
--  
-----

>Q2C4W4\_9GAMM/1-1039

MPTDAYNAAQTGGTTNPSSPAGTCPFQLKEVGIIPVRYALDGAIDNEPLYPLPDGANWKPPFKLNQQYNL  
RQ  
LRDGWLYVFSKKGKGLHTYKVEGDIPTAHHEGGTCAACTYDSDDTLWLSFAPNAWTERLITLFSGIDEG  
KT  
HRNQWMRKLDIKAFKQHMVAPHGLAKDLEASMADIGAVSQDIINSFTVTSTPLEAETSSPNSEFIKVKQ  
AG  
SAPTHQAALPQANIENGLFIALDDPLADITDIALKGLTLHAQKELVFGDDEDKHKLLMSDLVRSIAHPY  
DP  
KNAPSALQKKLKDNPQETLKFEATLNEYLVIESGLNQYKYDHNAFEGVKTLEPRKQELLAELKNQFSYQP  
TA  
KDTANYEQRNKNISEINWEGMSTFLNGKYSDELKGDVAPIKEDLDNAIISLGVNALRVGVDIENEQGO  
SF  
FNQLFLQLFTLMTAVSSDWKAPKNQSLMALAPYYYSPEFQSVIFQKISNDAVSFSNASDDTNMVSRLGEI  
YG  
WLDDGRIPDTHDITIKAAINNVLSAAKKAFSKAGNSAWEGLLDGLFPFQTHGENNLASGLRFIVARSLISD  
DS  
KITFSKDYVKNLEAFNSKLT PFLQTAQRQSSHLHAQNTTAMRDALGATKQKIADLIASEMPLLIKLDKEA  
MT  
AVRTKLTGYFSGLRERTISMVGKANKSLESINGADTVIGGFAAICNLWNLMVVSQQVTTKLKQAGTPQEQ  
VD  
VYIELASTVSWTLSAFAGVGRDAQVIANEFVNKSVQSALRQASNIEQVAIKRFAAAAKVTAIFGFFAAS  
EG  
YLTFKQAYNSDDWFEATLLTGKGFALGAQGIVSGFQLFNLASQTVILGEIIAAMVSTLFYAGIAYLIFS  
GL  
YNYFHRDEMQKWL RGSSWGKSPIKQTAKQELMGLEDIIWKPNIELTTKSVDIYLP SYLFDDEKQHYDLKV  
VV  
NKKKSTSYADIATEMKKPSKLVKVDVTRKRKKT SNGVSYITVPV TYDEGDTVVIAINYDRAWTESCQSYV  
GK  
LTSTGTFDLKKTQDVIRHHNGVAGLKLPTAG-----

-----  
-----  
-----  
-----  
-----  
-----  
-----

>A0A2T3Q4X0\_PHOAN/1-1052  
MPSDAYNAAEIAGTTSPSSPAGTCPLQSKAVGIIPVRYAIDGAMGDEPSYPLPEGSDWKPTFKLKHQHYT  
LR  
QLRDGWLYVYSEKLIKILHTYKIEGDIFTAQDEGGTCAACITYDGDDTLWLSFAHQEWTERLLTLFSDDNQ  
YR  
TKWMRKLNISAFKQQMRGSHAGMAKNLEPSVADIGAVSQDIINAFHTSTPLEADSAAPDSVFSQPKKAI  
AA  
PTYQVALPNTNVDNGLFFALEDPLADITDIALKLGTFHAQKELILGDDKDKHKLLISEFVRSIARVPYDP  
KN  
ASTTLQKKLKDNPQETLKFETTLNEYLRYSPLSTSSYGSEAYAANELSSESARIAALEMLTNTYYTPT  
DK  
DIEAFKSREKNIDEINWDGMSGFLDERYNKLDALVGNASHFIEDLESAFKLLGCDALRVGIDIEDDQGS  
YL  
NRWFEQLFPLMTAVSQEWEAAKKETLLALAPYYYSQEFHTVVHQQISNDIISFSNASDDTNMISRLGEGY  
GL  
LNDGRIPDITDITLALINNVL SAAKKAFSKAGNSAWEGLLDGLFPFQTHGENNLASGLRLIARSLISDD  
SK  
ITFSQDYVKNLEAFNSKLTPLLQTAQRQSSQLHAQNTTAMRDALGATKQEIADLIASDMPLLIKFDKEAM  
KA  
MNTAVRTKLTGFFSGLRERTISMTGKANKSLESINGAGTVIGGFAAICNLWNLMMVSKQVTSKLNQAGTP  
QE  
QADVYIELASTVSWTLSAFAGVGRDAQVIANDFVKLSVNDALKKSVSNLEQQVVIKRF AAAAKVTAIF  
GL  
FAASTEGYLTVKQLMKSDDWFEQILLSGKGLALVAQGIVSGFQLFNLASQTVILGEIIAAMVSTLFYAG  
IA  
YLIFSGLYNYFHRDEMQKWL RGSSWGKSPIKQTAEQELMGLEDIIWKPNIELTKKSVDIYLP SYLFDDEK  
QH  
YDLQVVVKKKHHNTNLSYAPPSVIQEEMNKPQKMMIDVTQAKRKKTSNGASYITVPVIYDEGDTVVIAIN  
YD  
RAWTESCQSYVGTLTSTGTDFLEKTQDVIRHHHG VAGLKLPTAG-----

-----  
-----  
-----  
-----  
-----  
-----

>A0A2T3MI89\_9GAMM/1-1029  
MSSDAYNAAEISGSASPSSPAGACPLQATEVGIIPVRYAIDGSMGEKPSYSLPDGTHWKPTFKLHQHYML  
RQ  
LRDGWLYVFSEKLVHTYKIEGEIFKAQHEGGTCASCLTYDSDDTIWLSYAHQAWTPRIVTLFSNEDEY  
RN  
KWMRPLNISAFKRRMNGPHAGMAKNLESSVADIGSVSQDIINGFSITSTPLKADTSTSEGEFSRTKTAIT  
AP  
TYQAALPNANVNDGLFIALEDPLADITDIALKLGTFQAQKEYIFGSDTDKHKLLMSEFTRSIARVPYDPK  
TA  
PMALKNKLKDSPLETLKFEAALNEYLRYPFKQTPYGSEANAVNALSSSETVRSAALNTLQNTYSYPTD  
KD  
IEHFKSREKNIGEINWELMSKFLTNKYNDLDKLEGEAAPLIEDLDNALISLGEDALRVGIDIENEQGQSF  
LN  
QLFSQLFSLMTSVSKDWKAAKKQSLALVPYYSPEFQSVIHTQISNDAISLSSSSDITNMASRVDEIYG  
LL  
DDGRISDTDDAIKATLVAAKSAFSKASSSAWKGLMDSLFPYHFSGKNGLASGLQLIVARSLVSKENKIQI  
SS  
DYSTQLAKFNKTLTPFLQQAERQSGQLHSQNTTAMRNALAKTKQQIANHIAQEMPLLITFETEAMNTAVR  
EK  
LTASIVGLRSRIGQSMESINGAGTVIGGFAAICNLWNLVVSKQVVSKLNNASSTQEADVYIELASTIS  
WT  
LSAFAGVGRDAQVIPNEFINKSVQKALIDSSYIEQQVVIKRF AAAAKVTAIFGLFAASTEMYLTGSQLWK  
SD  
SLLKALLFGKFSALTVQAGVSFTQLAYLATDVTIGGIIAAMVVSALFYAGIAYLIFSGLYNYFHRDEMQ  
KW  
LKGSTWGKSPKTQTPEQELMELENIIWKPKIELTKDSVDIYLPSYLFDEKQHLDLQVVVNNKKKSTAYAD  
IA  
IEMKKPSKVMVDVTQAKRMKTATNVTYISVPVKYVQGDTVVIAINYDRAWTHNCQSYVGHISKPGMFDLE  
KT  
KDVISNSNGAVGIKLSIAGLK-----  
--  
-----  
--  
-----  
--  
-----  
--  
-----  
--  
-----  
--  
-----  
--  
-----  
--  
-----  
--  
-----  
--  
-----

>A0A2T3QGI7\_9GAMM/1-1040  
MPSDAYNSAEIAGTKSPSSPAGTCPLQTKEVGIIPVRYAIDPTMGTKALFPLPEGDDWQPTFNINLPYTL  
RQ  
LRDGWLYVYSKKQKVLHTYQIENAVFTAQHEGGTCAACLTYSDDTLWLSYSHQRWTPRLIELFSTEKKY  
RE  
QWMRQLNIQAFRLRMKGHHAGMAKKLESSVADIGSVTQDIINGFAITSTPLNADDTESNSGFEFNKAKPA  
NP  
ASTYQVTLPESNVGNGLFIALEDPLADITDIALKLGSLHAQKERVFGSDEDKHKQLISEFVRSIARVPYD  
PK  
TAPEALKTKLKDNPQEVLFESVLNQLRYQSPLNQAQYGSEAYAANALS YEQPRLEAQKILNNTYHYTP

TD  
KDFEHFESRKKNIDLVDWNKMSIFINEKYAKLKAIEGDAATMLAELNRALKDLGVYAARVGV DIEETQGO  
LY  
LNTLFGHLFPLMAAVSQKWDAAEEDTLALAPFYYSPEFSKAINKAIPNDALSVTNASDMTNMVSRLGES  
IG  
FIYDGRIPGDEATKALITRVIQAAKNAITTAGDHVWDGLMDGLFPHQVSGESGLD SGLRLMVARSLVSK  
EG  
KLLISSDYVSKFDSFSDKLNPLLQKAEQLSGQLYANGTTAMRNNLNEIKEKIAKLIADEMPLLIKFEQEA  
MN  
DAVRGKLAASIMGLRSRLTSTVGQTVDNVNGVGT VVGGFAAICNLWNLWAVSQQVTSKLNANSTQDQAD  
VY  
IELASALSWTLSAFAGVGRDSQVIASKFVEMTVKRALAESASTVNQQVVIKRFVAAA KVTAFGLFAAST  
EI  
YLTGRQWQQSDDT FEQALLIGKIGSLAAQGA VSAFQLARVLGSTALLGEIIAAMVSTLFYAGIAYLLFS  
AL  
YNYFHRDEM QKWLNGAWGKSPKPQTLEQELTALENIIWKPKIELTKNSVDIYLP SYLLNDAKKHFDLQI  
VV  
HEKINLIYVSMNSHNETLKSTQIDVSQAKRKN TANGVGYISVPVLHKEGDEVIIAINYDRAWTEECQSY  
VG  
TRSSAGTFDLERTKGVVSKRHGVAGL TLPVAG-----  
--  
-----  
--  
-----  
--  
-----  
--  
-----  
--  
-----  
--  
-----  
--  
-----  
--  
-----  
--  
-----  
--  
-----

>A0A330LKA7\_9GAMM/1-1178  
MSDKASVYTVASGDNFTLIARRFGFRNYQAIYDHELNAEFKLRPDPSSIYPGDEIVIPHKVMKTIPAKE  
GG  
IQVFRVVKEKEITPLKQIGILPVRYAFSDKIAESLDEERQQLDSTG TNLESGLMSSGMRDYTLRQLRDGW  
LY  
VYNDTKSELDEYEISGSTYTKYDWDTIDQHADSQAGDAKSILLYNEGDKLAISFAPLRWTRVCEHMSND  
AA  
SRDAWMRQLDMSDYKNAPHTANI IKLSELVVDVDAEGDATFNNTCTPLSDPKLAGNKDGLVLHKAASVET  
DH  
TADLPEATEAIIIVALDDSLADV KDLYVALAQPYARHSLVMGLTDKEVADNTRKWEMAQFTKSLARVQLSG  
DE  
LPSKIKDNPLLKSKFNIDFNEYLNQVEARNAYSQTYAATQDILGTVAQKYENKITVSKTLLLEKYNFVPT  
YK  
QELDLIAQQSKYQDEVRWDELDAFCDDIEPKLKANLPLIKQAHKDLLASLRILGNEAMKVGLDVEDVES  
VT  
YLLNFSNALTSMMLTTLDEDGGASLKSFLTQQSPDNLLSLTTFCFSTAYQKEFEERM LLLFAELKTETDN  
GN  
YSFADSTANGSLWVGRFSEMDTLMGFNVAGA QGSTWYPLVQSAIQRTFN AFKEAAKGAASSAWGTLQTSL  
FT  
NALPSIVSNVNSDIIHHLRLG LLSNAIDEYSIIINKQFDNKMKQFNADLDAIDNRLKPLFRSKASLNSN

KN  
TSGKNSFYAKKFKKEAIDIEIEKLVNQQLHIENKPDFVFENEKLVDAISNQSTTELAGVAVAKRT  
QK  
AQGIYEKYGATSPGLAMLNFVNLLYKAEDYANSYDYLDKQKSRMNKDLASTFFWTASSISDVFRGVHWA  
QV  
QNQGD TLLRTSLRDAAADKKITVLVKRFSVSMGT MAGFGLVAAGVEAWMTWDDIDDSGSEFEDTLVQMKF  
AA  
LTAQTFIFGAQSVLWLF SKFGNLALGTIFLPWMTAVLAISGVVYLITSVVLGIIQKTPLETWVNKSTWGK  
RQ  
NKDWTAEQELLE YDKIVRQPMIEITTIVENETA AQMGYGRKPTKKRLVISVPGIKPNDEVDIGITKHSY  
VS  
TSTRIRDVSDISAVAAL TLDDL NQGIWAELEGLWQYSVDVIVETERDSFNVNIVVPAGSDIEYKATGSE  
GS  
LTVHVQDQVTIENSSNLFTSRVGHHE-----  
--  
-----  
--  
-----  
--  
-----

>A0A291U4L9\_9GAMM/1-1021  
MGQMNQPKSGPNQAAMAASNKDCKSPVGTCPFKNKELALVPVRYAVDEPFEAPATQPHPLPAKDFKGPLT  
LK  
ANPYTLRQLRDGWL YVFDETAKELEDEYEVKGSQFIHTSKGSKGHLLYHANHKVAMAFSHQRWTARLKTAY  
SE  
QSGLR SKGMRRFNLLSLASKMGGTHAGLLDVLSSHVADMGLANKGFEASCAPVKAPDGAAPGLLWHDKPA  
GS  
PAPCKVGM PDLKSALVVALDDIVSDMHDLTVRLGEVWAKQENPFSDDTQRHKWTMAAITEMVGLPPVNEQ  
QL  
PAAIKGNRLATFRFKSLLVYAKAERERQQFMLAPPVAVSTPQIATSLMASVDKALTALQGYKPGPDLVQ  
KW  
GEFRYKDVVRWQALEAQIAHQPLMDKLRKRWEV TYDDALLVLAALPGNPLLLGFDSQTEKAQAYLLTSA  
QE  
WLAMLQVTTPGMEWAKTLQKQLRKGALPALAHYGFDETVKIELVEQASWLNISNTTAGANASAGWSALAD  
EG  
RLLD SKLFAGLGASSKATMDALHQAITGPAMQAWERLTMVLHPLLLKQSNAAWVAVALEAVHTGQAVR  
FN  
KAFNTEAKAWLQHQAAGMQRQLGTPGQPISPHQTQELGQAGQQLQRARWPRLFLLEGKQVEFEANVA  
RY  
QALLHQGGVKAAGQAGKVWDSWGNFGGLAALVNMTNLVSTLDHYQENRLKVTGSPKALADLDRAV TYTAA  
WT  
GSAIAGVYQGSAYGALKENTLLAMKLDVAKEGYGLARRFALSMGAMAGLGLLAASLELAETWGKTEDT  
TN  
SDTEQFAYYLKAMGIGAQAVASGVALFQLVSGSLIGVIWAPWMMAFIAIGGVAYLVSTWLLARFGRTPIE  
RW  
LLQSTWGTPAGWTPAVELGEYERLAHAPEVTMDEKREL VIRMPAHISEMTLQAGVQRISYQANPSGSY  
PA  
AVSVHGAPQALPLPTRQGQRGEYRLPHTLTQGDKILLITYPAEESLSGTAQRFVIRGSLSLGAVLTAEI  
DA  
ALPVKGIL IEMKQ-----

---  
-----  
---  
-----  
---  
-----  
---  
-----  
---

>A0A1E4WT18\_9GAMM/1-1008  
MGQQNQAKGGPNQVAMAASPKDCKSPVGTCPFKNKEIALVPVRYALDEVFEAPAKQPHPLPAKYFKGPLA  
LK  
ANPYTLRQLRDGWLYVFDetakeldeyevkgsqfiHASKGSKGHLLYPANHKVAMAFSHRRWTERLKKEY  
CE  
QNSLRSKMRSFKLLSLASKMGGTHAGLLDVLSSHVADMGLPNEGFDVSCAPLKAPEGVEPGKLWHDKPA  
GS  
PAASKAGMPDLKSALVVALDDLISDMHDVTMRLCDIAIRHEQPFNDDDTRHRWTMAGITEMLALPPLDEG  
SL  
PPSAKGDRLATFKLKKQLQSYLVAKHDYKERQGSNGHYIDLGAEQRLMTQHAQLKQLGLNPDWAWPGV  
RF  
DDEVNWSGLEMIQQAQGV DALRPRWLATYDDALQLLQALPTSPLLLGLDSQTEDTQTLLLASSGQWLF  
SL  
FFAPDtkrgeqlTKALKKGALPALAHYGFdievkkelenngwigvgnitgvanalagleaiASNHLLSD  
SK  
LFGGLHEGAKATMSALKGAIAGVAIKPWQQLSELLHPHLLSgeklGRTLslVVLESiHTGQVRINAafv  
DE  
SKAFVAQVQGNLLGKLAATPGNKITEGHLGRMKAAGAELSOLKwPRLLLLEGGLQQDFERKMASYLKLQR  
QG  
AKGAQAAAKVWQEWGNFGGLAALLNIANLTVAlQGYDENARKLQGNPAAQLELSRNLAYTAAWTGSAMVA  
IK  
QQQVVVPSSELLGLRLSEAMKDNPALVHRFALTTGwMTGLGLLAAGLEAWETWQKLGDNTNADMEQFGYWL  
KL  
GGLAAQGAPVfVSMVWLRlgAEIVTIWAPwMVAAIGIGTLLYLATTVILARYSRLPVERWLLQSTWGNKP  
AG  
WNPVYELTQYEWLSSQPTVSLKDRQLEVGLPGYINTVAVELAVRRFKVPSTLHREAAMAGGLGGPEALDV  
RV  
ASATREQLVLDMGKvWLTdVDELVCCIYPGHESLSGEAQRFVARGTFSRGVILTAESDITLPVTGTIIG  
LQ

-----  
---  
-----  
---  
-----  
---  
-----  
---

>A0A1V3GE27\_9GAMM/1-417

MVILKHQAANDAACKMLNQTIERIWQKGAQAAQTSWNKLGNMGGILAILNIWNSASVLHNIRYKAEQHPE  
TS  
LWANPALREAIYSTAYAVSQVAGLWRDAAWKKIADKKLLEISLSEALDVSVASEKARLRAFTRATAMVS  
LF  
GFIAAGLEAWDSYKKYDDLSTSMESLGYVLKGVAAGSQAVVFVAQAVANFASRFGILGTSIGSIIATWM  
MT  
TLMVAGIVSLLAVLIINLVKRSDEMILLHSTWGKQTKQWEFFEELESLENIINKPQIRLNSVPNRLPSQ  
WM  
DAGTEQWQLELILPAFTQDTKIGLQVTRKPKDKNYHYRVAEPKPAVVVNEQRGTWSKEKISGNPIYRLDI  
GG  
STNDTVAVLVSMPEAWQASEMELGYVAVGSHQGELTVNPAPTDKKLAKRNIEVRVD-----

--

-----

--

-----

--

-----

--

-----

--

-----

--

-----

--

-----

-----

>A0A2S2CG45\_9GAMM/1-1045

MPSDAYNSAEIAGTKSPSSPAGTCPLQTKEVGIIPVRYAIDATMGTKALFPLPEGDDWQPTFNINLPYTL  
RQ  
LRDGWLYVYSKKQKVLHTYQIENAVFTAQHEGGTCAACLTYSDDTLWLSYSHQRWTPRLIELFSTEEKY  
RE  
QWMRQLNIQAFRLRMKGHHAGMAKKLESSVADIGSVTQDIINGFAITSTPLNADDTESNSGFENKAKPA  
NP  
ASTYQVTLPESNVGNGLFIALEDPLADITDIALKLGSLHAQKEMVFGSDEDKHRQLISEFVRSIARVPYD  
PK  
TAPEALKTKLKDNPQEVLFESVLNQYLRYSPLNQAQYGSEAFANALSIEQPRLEAQKILNNTYHYTP



---  
-----  
---  
-----  
---  
-----  
---  
-----  
---  
-----  
---  
-----  
---  
-----  
---  
-----  
---  
-----  
---  
-----  
---  
-----

>A0A0S2SI51\_9GAMM/1-1079  
MSSVDQAASAAGKTYRVKPGDSLKIAQANGTTVDALVKANGIKDPDLIYPDQTLTIPAHDKANPAASAO  
QA  
PAAKRPQESPNDAGSGGVQDACAASGTCPYKSKEIAIIPVRYALDELFDAPATQPHPLPSKGFKGPLAL  
KA  
TPYTLRQLRDGWL YVFDEKTKMLDEYEVKGSQFIHESKSGSKGHLLYPANHKVAMAFSHQRWTERLKKEYR  
KE  
SSLRSQGMRSFNLLSLASKMGGEHAGLLDLLSTHVADMGLPNEGFVDSCAPLKAPEGAEPGLLWHDKSAG  
SP  
GACKAGIPDLKSALVVALDDLISDMHDVTMRSDIAIRHEQPFNDDDTRHRWTMAGITEMLALPPLDESS  
LP  
VSARGDRLATFKLKKQLQSYLVAKHDYKERQGSNGHYIDPGAEQSLMALHAALKQLGLNPKWASWPGVR  
FD  
GEGRRMVNWSGLEGIIQOYAQGV DALRPRWLATYDDALLLQALPTSPLLLGLDSQTEDAQTLLLASSGQ  
WL  
FSLFFAPDTPRGAALTKALKKGALPALAHYGF DVEVKKELENPGWTGVGNITGVANALAGMEIASNDL  
LS  
DSKLLGGLHEGAKATMSALKAAGVAIKPWQQLSELLHPHLLSGEQLGRTL SLVVLESIHGTQQVRINP  
AF  
VAESQAFVAQVQGNLLGKLSVTNGKITEGHLDRMKAAGA EWQQLKWPRLLLL EGGLEQQDFERKMASYLNL  
QR  
QGARGAQA AVKVWQEWGNFGGLAALLNIANL TVALQGYDESSRKNQGNPAAQLELSRNLAYTAAWTGSAM  
VA  
IKQGQVVVPSHLLNQPLAKAREANPALVRRFALTTG WMTGLGLLAAGLEAWETWQKIGDNTNADMEQFGY  
WL  
KLGGLGAQGIPAVVSFGRLLFGATLGATWATW MVASIGIGTLLYLAATVILARYSRLPVERWLLHSTWGT  
KP  
AGWSAAEELLQYERVACQPTVALKEEKLTVELPPHLRTITL QLSIRRLGYAPSGQSYPAVSAVLGPAQEA  
AI  
KMTSQGAGQVTLVVAANQGDELQLQIGYPAEESLSGQPLRFMARGTLAKGVVLTAEIDDKLPAQGTMIEL

K-

-----  
--  
-----  
--  
-----  
--  
-----  
--

>A0A1N7BQ14\_9GAMM/1-1007  
MGQQNQAKGGPNQVAMAASPKDCKSPVGTCPFKNKEIALVPVRYALDEVFEAPAKQPHPLPAKYFKGPLA  
LK  
ANPYTLRQLRDGWLTVFDEAKELDEYEVKGSQFIHASKGSKGHLLYPANHKVAMAFSHQRWTERLKKEY  
CE  
QNSLRSKMRSFKLLSLASKMGGTHAGLLDVLSSHVADMGLPNEGFDVSCAPLKAPEGVEPGKLWHDKPA  
GS  
PDASKAGMPDLKSALVVALDDLVSMDHDSERLSDINLRYEHPFKDDDTRHRWTMAGITEMLALPPLDEG  
SL  
PASARGDRLATFKLKKQLHSYLVAKHDHKERQSGSHHYIDLGAEQRLMAQHAPLKQLGLNPDQWASWPGV  
RF  
DDEVNWSGLEGI IQQYAQGV DALRPRWLASYDDALQLLQALPTTPLLGLDSQTEDAQTLLLASSGQWLF  
SL  
FFAPDTRGEQLTKALKK GALPALAHYGF DIEVKKELEKNPDWLG VGNITGVANALAAMEAIANNALLSD  
SK  
LLGGLHEGAKATMSALKSAIAGVAIKPWQQLSELLHPHLLS GEKLGRTLSLVVLES IHTGQVRINPAFV  
AE  
SQAFVDQVQGNLLGKLAATNGKITEGHLGRMKAAGA EWSQLKWPRLFVQEGGLQQEFERRMASYLTLQRQ  
GA  
RGAQAAAKVWQGWGNFGGLAALLNIANL TVALQGYDENARKLQGNPAAQRELSRNLAYTAAWTGSAMVAI  
KQ  
GOVVVPEHLLLEKRLALAMKENPALVRRFALTTG WMTGLGLLAAGLEAWETWQKTGDNTNADMEQFGYQLK  
LA  
GLAAQGGAMGRSLMLLGRGASLGAIWAPWMAAIGIGSLLYLAATVILARYSRLPVERWLLQSTWGTKPA  
GW  
NPVYELTQYERLSSQPTVSLKGRQLEIGLPDYINTVAIELAVRRFKVPSTLHREAAMAGGLGEPEAFDVR  
VA  
GVSHNQLVLDMGKVWLT DVDELVVCIIYPSHESLSGEAQRVARGTFSRGGILTAESDIKLPVKGTIIGL  
Q-

-----  
--  
-----  
--  
-----  
--  
-----  
--  
-----  
--  
-----  
--

>A0A2T3NU56\_9GAMM/1-1162

MAKPAARLGDNHVCPRKTSKVPHVGGPAISGSSNVFINGLPAAKKGDNLVCGPMDTITEGSSSVFINGK  
PA  
ARMGDGSSHKGKIVAGSGNVFIGNKGQSASGGVDALAANGKDKHKKDTPSKVTSSENSTHSSNSLSPSD  
TG  
TSESSQPSKKPIRSKPTQQDNPLPSENELVSIIPVRYAYDTELLAPRTTGNFSKGPFTQIPYTLRQLR  
DG  
WLYIYNSTTKRIEEYQVEGSNIGGKSCLSYPKGNNIKLAYSFQQWTDRIKQSITTNRSLRARWMRNVRC  
GN  
NSTHCGDLDTLATTVADMQGNPVHDFSNSSTPLTENTSTNTVDNTESDLIRAKPATSPDDWKRDI  
ESDIA  
LV  
VALDDPLADLQDLTLGLMAPQLEQHAITADETSAHQWQIAHLVRNIARVQVPESEWSFKIDEENYIEFEQ  
DL  
HNYLIAWQEHENALLQQGSGHFSVSLDYLLKKQKLLLESKALLKEKWDFTPSSAHEAQWSQKRRFNDEIRWD  
EL  
NQFSAKIESQMAKSEAKIQLWADVLTQAVSQFGGDPMLRLWDIETPMGISLYLNLMS  
EICSSLLQAMHSE  
NE  
RTKLSRLLQRDDNLLALAPFGGSQHLKSALDKDQDVTDNSIFTGVSDWASLVNRISDFEVLFEHKEITDSRW  
FK  
ALTEPVQNTLLALRQAVRQNVSESWHNIIVVSITPLQRPNGLVPGLLSDIRTLFLESRLHDQHIEFDKNYR  
NS  
QQNFNTKLRQAIQFDVTSTVHTSPTVSIYSHAHQSRRAKQSLINVIADYPSFMAVKNNVSKQTRAAIK  
TN  
TQALAAQAIHGKTTLATHYGNLGGTGAMVAILNSINFLGLMSEIEKLP  
SDSKVQRQAMEQAAIGFMWALS  
SI  
GDVVRSTFKKLQSEHSSLLKYSIREAIKLETTTQIQKQLTSFRAGMYTMAITGFIAAGWEVVNIFEHW  
KN  
TDSLERSLLLIKSGGLGANILVFGITIFNTSSQYSIAAIIAPWMTALFWGGLVVLIASLLLSIIKKSP  
IE  
KWLVRCLWGNENRNWSIEKELSEYQKIIYQPQAKIIKSNRQCIRQPVYN  
SPGLYSIHKTIQIQLPDSSMN  
FA  
LTISGQTTNTILNGRWVTHQEQR  
YFEVDISYTSAYANITISLQYTDIPFFNYTL  
SASKQGGFIIASTVPA  
NQ  
QNLIELQASL-----  
--  
-----  
--  
-----  
--  
-----  
-----

>A0A3A9ISN9\_9GAMM/1-1059

MNRTYQIKQGDTLSDIARRHHTTADEIAKRNAIPAPHILYPGQTLILPDANALALDSAASIEGAMLAALC  
AS  
NKDCKSPVGPFPNNAETALVPVRYALDEPFEAPATQPHPLPATGFKGPLALNTPYTLRQLRDGWLYVFD  
ET  
AHILDEYEVKGTQFIHANKGSKGHVLYPARHTVAMAFSHQRWTERLKTAYCEQDDLRSKGMRRFALPSLA  
RN  
MGGPHAGLPALLASHVADMGLPNDGFVMSCAPLKAPDGVPEGLLWRDKPAGSSYASRANMPDPQSALVVA  
LD  
DLISDMHDVTEHLSDTLLRYERPFNDDTRHRWAMATITEMLALPPLDEYSLPAPAKGDRLATFKLKKQL

QS  
YLVAKH DYKERQ GSGNH YTPGAEQL LMKQHAELK QQGVN PDTWADWPGV RFDDEVN WSGLEE IITQYGO  
EI  
DALRPRWLATYDDALQLLQALPSSPLQVGLDSQTVDAQTFL LANCGQWL FSLNMAPDAQRSEQLTAALKA  
GV  
LPALAHYGFIDVKKEL ENPDWVG VGNITGAANALAALEAIANNDLLSNNKVFGGLHEGAKATVNALKS  
AI  
AGAAIKPWQQLSELLHPHLLKGEKLGRLLSLVVLESFHTAQQVRINKAFIAESNAFVYQVQRN ILGKLAA  
VP  
GTKITEGYLGRMKAAGA EWQQLEWPRLLLQEGGVQQEFERR LASYLTLQRQGAKGAQAAARVWQDWGNFG  
GL  
AALLNIANLTVALQGYDENARKLQGNPAAQLELSRN LAYTAAWTGSAMVAIKQGQVVVPTHLL EKRLALA  
MK  
DNPALARRFALTTGMMTGLGLLAAGLEAWETWQKTEDNTNADMEQFGYQLKLSGLAAQGGAMGRSLMLLG  
RG  
ASLGAIWAPWMVAAIGIGSLLYLAATVILARYSRQPIERWLLQSTWGTKPAGWSATEELFQYERIASOPT  
VA  
LKEGMLTVELPPRLRTITLHLSVRRLSYALAKQSYPASITTPVLGPAQEAVIKVASKGPGQVTLAIAANQ  
GD  
ELLLQIGYPVAETLSGQPLRFMARGTLAKGVVLTAEIDDKLPVQGT FIELK-----  
--  
-----  
--  
-----  
--  
-----  
--  
-----  
--  
-----  
--  
-----  
--  
-----  
--  
-----  
--  
-----  
--  
-----  
--  
-----  
--  
-----  
--  
-----

>A0A175VKS4\_AEREN/1-1001  
MSTPNQAAGAASNKDCKSPVGTCPFKNKEIALVPVRYALDEIFDAPATQPHPLPSKGFKGALALKSTSYT  
LR  
QLRDGWL YVFDEKTKMLDEYEVKGSQFIHESKGSKGHLLYPANHKVAIAFSHQRWTERLKNAYSEQSALR  
SK  
GMRSFNLLSLASKMGGGHAGLLDLLSTHVADMGLPNKGFVESCAPLKAPPGVEPGLLWRDKPAGSPDASK  
AG  
IPDLKSALVVALDDMVSDMHDLTMR LSDIHVRYEQPFTDDDASHRWTMAGITEMLALPALDDNTLPAGVK  
GD  
RLATFKLKKQLHSYLVAKHDYKERQSSNHYIDPGAEQRLMARHAQLKQLGINPDLWADWQGV RFDDEVN  
WS  
GLEGVIERYAREVDALRPHWLATYDDALQVLQALPHSPLQLGLDSQTVDAQTFL LASSGQWLSGLFFAPE  
PQ  
RGEQLTSALKK GALPALAHYGFIDIEVKKEL ESSPGWVSVGNITGAANALAGLEGIANARDLSNSKLLGGL  
HQ  
GARATMNALKGAI AEVAIKPWQQLSELLQPHLASGEKLG RMLSLVVLESIH TGQQVRINSEFLAELNAFT  
AQ  
VQGNLLGKLAVTSGQQITEGHFARMQAAGA EWQQLKWPRLL LLEGLTQQDFERRMAYLTLQRQGARGAQ  
AA  
ARVWQGWGNFGGLAALLNITNLAVALQGYDENTRKLQGNPAAQLELSRN LAYTAAWTGSAMMAIKQGQVV

VP  
KELLGKTI AELAMENPSLARRFALTTGWMTGLGLLAAGLEAWETGTKLMDDTNADMEQVGYGLKLAGLAA  
QG  
VPALWSSGYLIARASLGAIWAPWMVASIGIGTLLYLAATVILARYSRLPIERWLRQSTWGIQPADWDPIN  
EL  
AQYERLSSQPTISLAGRQLEIGLPGYIDNVAVELAVRRFKVPSVLHREATMAASLGDPEIDFRIASATN  
DK  
LVLDLGKMWLTDVDELVVCIIYPSYESLSGEAQRFVARGTFTRGVILTAESDIQLPVKGTIIIGLQ-----  
--  
-----  
--  
-----  
--  
-----  
--  
-----  
--  
-----  
--  
-----  
--  
-----  
--  
-----  
--  
-----  
-----

>A0A3M3S660\_PSECI/1-1125  
MTHKHGTLQRRATRFDKTPSNATSLCPFKGPDVAIVPVRYALDRSRYDVEPEQLKPLPAQGQWSALPRL  
RT  
RSYTTLRQLYDGYVYVFDETAETFHEYSFSGIDACLTRIVWTEAHQGQDVRRGEGEGKPYLLYPRKHRLHL  
AF  
SPVQWTWRICEHLRSHADSRALWMKPVDLARFCVTLNQPDTLPLPALASAVADIDKEWLVEDNRFADSSI  
PT  
SDPRNLAAPSLFTPLGADVWLGSPDQYSSLLIALDDPLGVLNDLGLQLAGDQAAYQTWQQEHEHKLQM  
AQ  
TVTLLCGANGDPQHLPESVRGDHLKTQYQLNELETCFDQMDLEEMLTMHGSPGGSLGTSDMFQSADMRH  
AF  
RTRYGRYPSQEDRQAWKAREKWRGEIDLRGARAYLQAHLPLSDTLLQVRDTRHDFQIWTEYLGNDPLRL  
FI  
DTTNPRTLLYLQTVMTQLLAVYGQDQQASAWLAEQEAKGSSLFGTMRYGFSPALKEALHRQANALFNGLG  
DL  
TNLATRAGELNTALNHRGFADAAMKCLKQPVDTFKALRELARGAGKTIAETMLLAWVPVDSRLALGRA  
QN  
LVALLRNLMIQQLLADTPDLIRLDEQIASRLKQWKREQRLLIKQIDDTRFNWLHPLHPRERRNLARQLQS  
QL  
DALRLHELNIPGLLDQNNRCAQLLQAEIRAFFKSGLDVAKDWHARARAWNERLGGLGAAITWGVILINF  
IN  
TAVLYQDLTRDGDFSAKDIVKIGYSLSYSFNLLMAVFVEAPWAVIREAKPVVIGGYDIGILDRSSAYWKA  
QG  
NHVWGEAISGFRVMMVAVGAFVTAAVLELWDIWDHANAKTSEEKIALSVKGVAVILMIVGGSFQLIAG  
MT  
LSKTLVTIVMSSWFAVAFVIGALYLIASLALNYFKQDSVGWWRKCCWSRSPEHRHAETPEGEAEEKRA  
LL  
EIQLSPQILVKSTVEYRRKYIGMAGYVDMVPVQNGAWIQIRLPEVLRGQWVQLNVISSTRPFGFMPTVQTN  
TP  
IADKFEERGKFTPLDKSGSLGSRPPHNPSDLYFPVFPAGEDVWVQWVPLREEADYIELQIWYPKAVGV

SG  
EKAQSYLYQIELSQEGNMTVDGSTLTQLEVNKYSRAQALTLVLP-----  
--  
-----  
--  
-----  
--  
-----  
--  
-----

>W0HGP4\_PSECI/1-1128  
MTKKHGTLQERRGARFDKFPSSATCACSLKTADIAIVPVRYALDRSRYDVEPAQLKPLPARGQWSPLPRL  
KT  
RSYTLRQLYDGYVYVFDETAGTFHEYSVSASDACLTRIVWTEAHLGRDVRSGDGEGNPYLLYPRRNLHL  
AF  
SPVQWTWRICEHMRSHADSRALWMKPLDLANFCATLNEPGTLPLMTLATAVADIDKNYVVEDKRFADSSI  
PT  
AEPEPQPDQAAKSLFTPLGADVWLGNVDPDRCSLLVALDDPLGVFNDLGMQLAGDQAAAYQNWQOEHEHK  
LQ  
MAQTVTALCGANGELKHLPSWVREDSASTQRYLHEMEEYFDQMDLEEMLTMHGNNPPGGS LGTMDMFKSAE  
MR  
QMLHTRYGRYPSEDDRQAWKDREKWRREVDLKGARTYLQDNLPISEALLQQVRDTQADFQTWAEHLGSDP  
LR  
LFIDTANPKTLLYLQTVMTDLLMVYGDQDQASVWLAKQEARGSTLFGTMRYGFSPGLKEALDQEANALLN  
GI  
GDFTNLATRAGELNAALNHQGFADAAMKKLKQPVDTFKALRELASGAGKTIAENMLLAWVPVDSRLAL  
GK  
GONLGALIRNFMIGQILANTPEMIRINEQIASRLKQWKREWWLLTKQIDDTRFNWLYPHHPRERRNLARL  
LQ  
SQLEALRLHELKIPSLDFQNNQYAQLLQDEIRAFFKSGLDVAKDWHTRAKAWSERLGGFGAGITWGVIL  
LN  
FINTAFLYEDLTRDGFSGKDIVKVGYS LGYSFNLLMAVFVEAPWAVIKNATPVLIDGKSIGILDRSSAY  
WK  
AQGNNAWGDAIRGFRSTVVALGAFAVAAAMLEIWDIWDHKNARTSEEKTALVVKGFAVLAMGAGGVTQL  
IA  
GLTLSRAAVFFVMSTWVTIGILIAGFVYLIASMLNYFKQDSVGVWLRKSCWSRSPEHRHTDTQEGKLEE  
KR  
ALLEIQLSPQILIKSTVEYRQKYIGKVGVDIPIQNGAWIQIRLPEVLRGQCVQLNVISSTRPFGVLPV  
EA  
DTPIADAFEKRGKFAPLKEFGRLGSRPPYKSPDLYFPIFPAGEDVIWQTWVPLREEATYIELKIWYPNE  
VS  
ASEQKAQSYLYQIELSQEGSMVVDGSTLTQLEVSKKSRANALALALPE-----  
--  
-----  
--  
-----  
--  
-----  
--  
-----

>A0A0Q0AFA7\_PSESY/1-1126

MTDKSGTHTQRRRAATFAKTPATATSLCPFRKPEVAIVPVRYALDRSRYDTAPEKLPKLLKGSRWAVMPKL  
KT  
RSYTLRQLYDGYVYVYDETAETLHEYAVSAATGNLSRIVWTDQAIGSNQRSGGSDAKPFLLYPRNNLLRI  
AF  
SAQQWTRICEHLRSNPASRTSWMKALDLKRYCMTMAEPHTLPLNRIAEAVADIDKEHVVEDDRFADSAI  
PT  
SKASSEETQPLFSPIGADVFWQGSVEDQDSSLLIALDDPLAIFNDLGMQLAADQAAYRNWQAEHEHKLQI  
AQ  
TVTTLCGAESEPEKLPASVRDNAALTHQYLGELEAYFEQCILEEAQISSSNVPGDFLLMPDMFKSPEMRR  
SI  
ETRYGSAPSDDALQAWKDRHKWRREVDLSGARQYLQQHLPTGDTLLQQVRDTQSDFRQWSTHLGTEPLKL  
FV  
DPTHPESELLYLQTLMLNLQIIYAQDNAASAWLAEQEANDSSPFGTLRYGFSPALKHALHQEANALLNGLG  
DV  
TNLATRIGELNGTLNHQGFADKPWMKALKQPVQDTFKALGQLASGAGKGT FESILLAWPIDSR LAVGKQ  
QN  
IVALIRTL LIGQILLDSKARIAIDHTMLAKLKNWISEWQVLNKQISDTRRSWLYPTAYKPRKSIARHLRA  
LE  
QKLRLHEL SMPALLDYQNN EYAKQLQGEIRQHFQSGKAI AKDWLSTARRWIDGLGGIAGSITWGVIMLNF  
IN  
TAFTYRDLTRDGD FSAKDVGKV TYGLGYSFNLLMAVFVEAPWAVIRDATPVLIDGKNVGILDRSASYWRA  
KG  
NAAWSDAIRGFRVSMVAMGAFGVAAMLEVIDIRDDWNKLETSAEKNATI IKGFAASAMGLGSLAQLLVG  
IS  
PASKLTILVMSPWF SFALLVTGTIYLLATMALNYFKQDLVGWWRKCCWSRTLQYRHPETPQGHYDEIRN  
LL  
EIQLGPQLYVKSTTHYEDRYLGKGDYFSATI QNGAGIQLRLPNILRGRSVNFNVISSKRPWGIMPV NKID  
QP  
IYQDFLDRGQFRATSQFGVLTEKRIEHVHKDCTFPLMPPEGEDVIWETWVPLEQDARYLELQIWYPENLI  
CT  
GVEDTG YLFQIELDTQGHTSFEGSSAADLEVKSLNRLGFMTLEIAE-----  
--  
-----  
--  
-----  
--  
-----  
--  
-----  
--  
-----  
--  
-----

>A0A3M3CWU2\_PSESJ/1-1126

MTDKSGTHTQRRRAATFAKIPATATSLCPFRKPEVAIVPVRYALDRSRYDTAPQKLPKLLKGSRWAVMPKL  
KT  
RSYTLRQLYDGYVYVYDETAETLHEYAVSAATGNLSRIIWTDQAIGSDQRSGSSDAKPFLLYPRNNLLRI  
AF  
SAQQWTRICEHLRSNPASRASWMKMLDLKRYCMTMAERDTLPLNRIAEAVADIDKEHVVEDDRFADSAV  
PT  
SESSSEETQPLFSPIGADVFWQGSVEDQDSSLLIALDDPLAIFNDLGMQLAADQAAYRNWQAEHEHKLQI  
AQ  
TVTTLCGAESEPEKLPASVRDNAALTHQYLGELEAYFEQCILEEAQISSSNVPGDFLLMPDMFKSLDMRK

SI  
EMRYGSAPSDEALQAWKDRHKWRREVDLSGARQYLQQHLPTGDTLLQQVRDTQSDFQQWAIHLGTEPLKL  
FV  
DTTHPESLLYLQTLMLNLQIIYAQDNAASAWLAEQEANDSSLFGTLRYGFSPALKHALHQEANALLNGLG  
DI  
TNLATRIGELNGTLNHQGFADKPMKALKQPVQDTFKALGQLASNAGKATFESILLAWPIDSRSLAVGKQ  
QN  
IVALIRTLIGQILLDSKARIAIDHNMLAKLKNWISEWRVLNKQISDIRRSWLYPTAYNPRKSISSHLRA  
LE  
QKLRLHELSPALLDFQNNQYAKQLQDEIRLHFQSGKAIKEWLSTAKRWLDGLGGIAGSITWGVIMLNF  
IN  
TAFTYRDLTRDGFSTKDVGKVTYGLGYSFNLLMAVFEAPWAVIRDAKPLSIGGYNIGILDKSAAYWKA  
RG  
NAVWGD AIRGFRGSMVAMGAFGIAAATLELIDIYEDLTKLKTTEEIISARIKFGSVGLMAVGSIFQLAAG  
IS  
PASSFALIAMSSWFSVTILLIGAIYLLATMTLNYFKQDSVGVWLRRCSSWSKSKKYRYVVDAGGQLEEKLA  
LL  
TIQLSPQIHVKSTTRDENHYFGRDTPYNAPVQYGAGIQILLPSAVRGQSVHFNIISTKRPLGVLVPTKID  
EP  
ILYPFLDRGQFKKVGQFKNLVNQPARKAQEDFTFPLMPPEGEDVVWETWVPLENDATYLELQIWYPDSL I  
QP  
VQQDVGYLFQLELSSKGDTAVDGLANTELEIKTYSRISALTLEIAE-----  
--  
-----  
--  
-----  
--  
-----  
--  
-----  
--  
-----  
--  
-----

>W0HDN8\_PSECI/1-1128  
MTKKYGTQERRAARFDKSPSSATCACLYKTADIAIVPVRYALDRSRYDVEPTQLKPLPARGQWSPLPRL  
KT  
RSYTLRQLYDGYVYVVDDETAGTFHEYSISASDACLTRIVWTQAHLGQDVRRGDGEHPYLLYPRKNRHLHL  
AF  
SPVQWTWRICEHMRSHADSRALWMKPLDLSNFCATRNEPGALPLMALATAVADIDKNYVVEDKRFADSSI  
PT  
AGPESQPDQAEQSVFNPLGADVWYLGNVDPDRCNLLVALDDPLGVFNDLGMQLAGDQAAFQWQHEHEHT  
LQ  
IAQVTALCGANGDVQKLPASVRGDSARTQHLYLNEMEEYFDQMDLEEMLTMHGNSPGGSLGTMDMYKSAD  
MR  
DALRSRYGRYPSEDDRQAWKDREKWRREVDLKGARAHLHHHLPLSEALLQQVRDTQADFQWAEYLGNDP  
LK  
LFIDTANPKTLLYLQVTMDLLMVGQDQQASAWLADQEARGGSLFGTLRYGFSPGLKDALDQEANALLG  
GI  
GDFTNLATRAGELNAVLNHQGFADAAMKTLKQPVQNTFKALRELASGAGKTIAENMLLAWVPVDSRLAL  
GK  
SQNLVALIRNFMIGQILANTPEMIRINEQLASRLKQWKREWLLTKQIDDTRFNWLYPLDPRERRHLARQ  
LQ  
SQLDALRLHELKIPGLLDFQNNQYAQLLQEEIRAFFKSGLDVAKDWHTRAKAWSERLGGLGAGITWGVIL

LN  
FINTAFLYGDLTRDGFSGKDIVKVGYSLGYSFNLLMAVFVEAPWAVIKNATPVLIDGKSIGILDRSSAY  
WK  
AQGNNAWGDAIRGFRSTVVALGAFAVAAVLELWDIRGDYQNAKTEEERAALLVKGIAVFVMGVGGLAQL  
VT  
GLTLSSRIAIFVMGTWFTIGLLIAGVVYLIATMVLNYFKQDSVGGWLRCCWSRSSEHRHTDTPEGEVEE  
KR  
SLLEIQLSPQILIKSTVEYRQKYMVGAVGYVDVPVQNGAWIQMRLPEALRGQLVQLNVISSTRPFGFLPTE  
QT  
DTPIADKFEERGKFTPLKEFGKIGNERPPYSPSDLYFPIFPAGEDVVWQTWVPLKEGATYIELQIWYPNS  
VS  
ASGQKAQSYLYQIELSQEGDMAVDGSSLTLLLEVNKKSANALILVLPE-----  
--  
-----  
--  
-----  
--  
-----  
--  
-----  
--  
-----  
--  
-----

>A0A3M2UL50\_PSESX/1-1142

MHTAGDIARFCAEIPCMTDKSGTHTQRRRAATFAKTPATATSLCPFRGPDVAIVPVRYALDRSRYDTAPQK  
LK  
PLLKGSRWAVMPKLKTRSYTLRQLYDGYVYVYDETAETLHEYAVSAASGNLSRIIWTDAQLGSDQRSGGS  
DA  
KPFLLYPRSNLLHIAFSPQQWTRICEHLRSNPASRTSWMKALDLKRYCMTMAEPHTLPLNRIAEAVADI  
DK  
EHVVEDDRFADSAIPTHESSSEENQPLFSPIGADVFWQGSVEDQDSSLLIALDDPLAIFNDLGMQLAADQ  
AA  
YRNWQAEHEHKIQIAQTVTTLCGAESEPEKLPASVRGNAALNHQYLSEVEAYFEQCIFEQEIQGNNTAPG  
GV  
LLLDPDIFKSPERMRSLEMRYGSAPSDEALQAWKDRHKWRREVDLSGARQYLQOHL PAGDTLLQQVRDTQS  
DF  
RQWSTHLGTEPLKLFVDPTHPESELLYLQMLMLNLQIIYAQDNAASAWLAEQEANDSSLFGTLRYGFSPAL  
KH  
ALHQEANALLNGLGDITNLATRIGELNGTLNHQGFADKPWMKALKQPVDTFKALGQLASGAGKATFESI  
LL  
AWVPIDSRLAVGKQQNIVALIRTLIGQILLDSTARIAIDHTMLAKLKNWISEWQVLNKQISDARRSWLY  
PT  
AYNPRKSIASHLRALEQKLRHLHLSMPALLDFQNNQYAKQLQDEIRLHFQSGKAITKEWLNSAKRWLDGL  
GG  
IAGSITWGVIMLNFINTAFTYRDLTRDGFSAKDIGKVTYGLGYSFNLLMAVFVEAPWAVISTAKPLVIG  
GY  
NIGILDKSAAYWKARGNAVWGDAIRGFRGSMVAMGAFGIAAAALEILDIGNDLNNIKTSEDRIASEIKIA  
SV  
AMLLGSAIQLSAGIFPTTFLAAFAMASWFSVLLLLTGVVYLLATMALNYFKQDSIGWLRKCCWSKSIE  
YR  
YSTNGEGQLEEKLALLTIQLSPQVYVKSTTRDETRYLGKGDYYSTPEQYAGVQILLPKAVRGQSVHFNV  
IS  
SKRPWGVLPVKKIDSSIQESFLSRGQFKKTDHFGNLANLPTRNAEEDFTFPRMPPENEDLVWETWVPLEK

EA  
AYLELQIWYSDNLLNSGPQDIGYLFQLELSGKGETAINGVDTTVLEVKSASRINALTLEIAD-----

--

-----

--

-----

--

-----

--

-----

>F3GHL9\_PSESJ/1-1117  
QRRRAATFAKIPATATSLCPFRKPEVAIVPVRYALDRSRYDTAPQKLKPLLKGSRWAVMPKLKTRSYTLRQ  
LY  
DGYVYVYDETAETLHEYAVSAASGNLSRIVWTDQFGSDQRSGGSDAKPFLLYPRNLLRIAFSAQQWTW  
RI  
CEHLRSNPASRASWMKMLDLKRYCMTMAERDTLPLNRIAEAVADIDKEHVVGDDRFADSAPTSESSEE  
TQ  
PLFSPIGADVFWQGSVEDQDSSLLIALDDPLAIFNDLGMQLAADQAAYRNWQAEHEHKLQIAQTVTTLCG  
AE  
SEPEKLPASVRDNAALTHQYLGELEAYFEQCILEEAQISSSNVPGDFLLMPDMFKSLDMRKSIEMRYGSA  
PS  
DEALQAWKDRHKWRREVDLSGARQYLQOHLPTGDTLLQQVRDTQSDFQQWAIHLGTEPLKLFVDTHPES  
LL  
YLQTLMLNLQIIYAQDNAASAWLAEQEANDSSLFGTLRYGFSPALKHALHQEANALLNGLGDITNLATRI  
GE  
LNGTLNHQGFADKPWMKALKQPVQDTFKALGQLASNAGKATFESILLAWVPIDSR LAVGKQONIVALIRT  
LL  
IGQILLDSKARIAIDHNMLAKLKNWISEWRVLNKQISDTRRSWLYPTAYNPRKSIASHLRALEQKLRLE  
LS  
MPALLDFQNNQYAKQLQDEIRLHFQSGKAITKEWLSTARRWLDGLGGIAGSITWGVIMLNFINTAFTYRD  
LT  
RDGDFSAKDIGKVTYGLGYSFNLLMAVFVEAPWAVISTAKPLVIGGYNIGILDKSAAYWKARGNAVWGDA  
IR  
GFRGSMVAMGAFGIAAAALEILDIGNDLNNIKTSEERIASVAMMLLGSIAIQLSAGIFPTTFLAA  
FA  
MASWFSVAVLLL TGVVYLLATMALNYFKQDSIGWWRKCCWSKSIEYRYSTNGEGQLEEKLALLTIQLSPQ  
VY  
VKSTTRDETRYLGKGDYYSTPEQYGAGVQILLPKAVRGQSVHFNVISSKRPWGVLPVKKIDSSIQESFLS  
RG  
QFKKTDHFGNLANLPTRNAEEDFTFPRMPENEDLVWETWVPLEKEAAYLELQIWYSDILLNSGPQDIGY  
LF  
QLELSGKGETAINGVDTTVLEVKSASRINALTLEIAD-----

--

-----

--

-----

--

-----

--

-----

>S3NLS3\_PSESY/1-1128

MTDKSGTHTQRRRAATFAKTPATATSLCPRFGPDVAIVPVRYALDRSRYDAAPQKLKPLLTGSRWAVMPKL  
KT  
RSYTLRQLYDGYVYVYDETAETLHEYAVSAASGNLSRIIWTDAQLGSDRRSGTDDGKPFLLYPRNNRLHI  
AF  
SPQQWTRICEHLRSNPASRTSWMKALDLKRYCMTMAEPDTLPLNRIAEAVADIDKEHVVEDDRFADSAI  
PA  
ARPPSDSDEGKALFSPIGADVFWQGSVEDQDSSLLIALDDPLAIFNDLGMQLAADQAAYRNWQAEHEHKI  
QI  
AQTVTTLCGAESEPEKLPASVRNNAALTHQYLSDVEAYFEQCMFEQEIQGNNTAPGGVLLLSDFKSP  
EM  
RK  
SIEMRYGSAPSDEALQAWTDRHKWRREVDLSGARQYLQHLPTGDTLLQQVRDTQSDFFQWAIHLGTEPL  
KL  
FVDTTHPESLLYLQTLMLNLQIIYAQDNAASAWLAEQEANDSSLFGTLRYGFSPALKHALHQEANALLNG  
LG  
DITNLATRIGELNGTLNHQGFADKPWMKALKQPVQDTFKALSQCLASSAGKATFESILLAWVPIDSRLAVG  
KQ  
QNIVALIRTLIGQILLDSKARIAIDQKMFTKLKSWISEWRVLNKQISDTRRSWLYPTAYNPRKSIARHL  
RA  
LEQKLRLHELSPALLDYQNNYAKQLQGEIRQHFQSGKAITKDWLSTARRWLDGLGGIAGSITWGVIML  
NF  
INTAFTYRDLTRDGFSAKDIGKVTYGLGYSFNLLMAVFVEAPWAVIRDAKPLSIGGYNIGILDKSAAYW  
KA  
RGNVWGD AIRGFRGSMVAMGAFGIAAAALEAIDISNDRSKLKTSAEKNATVIKGLAVAAMGLASFAQLL  
TG  
ISPASRLTTVMSPWFSLALLIAGTIYLFATMVLNYFKQDSVGVWLRKCCWSRTP EHRHANTAQEKNEI  
RS  
LLQIQLSQPQIYVKSTVRYEDRYLGKGDYISVAVQNGAGIQVRLPGTLRGSSVSVNVISSKRPWGVLPVEK  
ID  
RSVQADFLDRGQFRNVKQFGTLTNKPAGKAYEDFTYPLMPPQNEVDI WETWVPLDKDASYL ELQIHYPMH  
LI  
NSGQSDTGYSFQLELDTKGSTSF DGLTEAELEVKSSGRAGLLMLEIAN-----  
--  
-----  
--  
-----  
--  
-----  
--  
-----  
--  
-----

>A0A2P1VUM0\_PLESH/1-1042

MDQASQEKQGDKEDKVGSSNQGNPNQDALAASNQDCQSPAGVCPYKGLEIALVPVRYALDEPFKAPEKQP  
HP  
LPNSHFKGPKLKTGNAYTLRQLRDGWLYVYDESAQQLDEYEVKGD LFISETKGS HG YLLYPMKHTVLLV  
SH  
QRWTERLKKIYSEDEAVAGDVEVSAIRGKALRSKVMRK FELIKFANQGCEHAGTLDLLASHVADLGLPNQ  
GF  
ASTCAPLKAPDGISQGMLWAEKPASTPEAHKAGMPDIKSGMVVALNDLISDIHDLTTRLD DIHVLHEQPF  
KN  
DNRHLWQMAGITQMLALPSIAESELPAKVRGDQLAIFELQKQLQEYLVTRYQYAMRQGSCNHYIDLGA E

QT  
LSTQLKALKDAGINPEAWGDWQGVRFDAVNWADLKSFIARYAKEIEALRPRWEATYDDALIAMNALAQS  
GL  
LLGVDCETEEAHLFLLACSHQWLLALQFSPDQERTTKLTQHLKHSSLPALAYYGFESDVKAAFEQQT  
DWT  
NV  
GNITAVGNMLGGLEGIASEAKLSDSKIFGLLHEGAKKIVTALKGAITGPAKVWVQHTTELLHPHLLQ  
GAK  
LG  
QAIQLLALESVYIAQDVRINKNISNDINTFARAVKNNILVKLQSSTGKTPDNTLFGRMQMAGTEW  
REIRW  
PK  
LFLMSEDLQAKFEGKMELYLKLQKGAAGAQAASKVWRDWGHFGGFAALLNITNLIVVLAGYQ  
QNHRAQQ  
GD  
PQAQLALLRNLVYTAAWTGNAIISVKQGAIALPESLRNKSLSMAMKENPALTQRFTAMTSWMTG  
FGTLAA  
GL  
EMLETWEKIKDDANAEGEQVGYWMKASGLLLQGAPSLASLLRLLQGTRLAIWAPWMMVASIGIG  
TILYLV  
AT  
LMLAHYGLLPIERWLKSSWGVTPDKGWTAEIEFIQYERIVKQPVIKLIGNQLEIKIPDYVQSI  
AVQGS  
RR  
AHVAQNYPAVYLGKEEALTLRLVKKTPGQCTLALLAHLGDKQGGSVRPVESGDELTYIMYP  
SSESLSG  
ES  
LRFIARGSLKTNLVITAEITSGFPIQGVTIGLHA-----  
--  
-----  
--  
-----  
--  
-----  
--  
-----  
--  
-----  
--  
-----  
--  
-----  
--  
-----  
--  
-----  
--  
-----  
--  
-----  
--  
-----

>A0A2V4S3I5\_PSESJ/1-1132  
MTDKSGTHTQRRATFAKTPATATSLCPRFGPDVAIVPVRYALDRSRYDTAPEKLPKLL  
EGSRWAVMPKL  
KT  
RSYTLRQLYDGYVYVYDETAETLHEYAVSAATGNLSRIVWTDALQSGDQRSGGSDAKPFL  
LYPRNNLLRI  
AF  
SAQQSWRICEHLRSNPASRDSWMKALDLKRYCTTMAEPDTLPLNRIAEAVADIDKEYV  
VDDDRFADSAI  
PA  
ARPPSDSDEVKALFSPIGADVFWQGSVEDQDSSLLIALEDPLAIFNDLGMQLAADQAAYR  
NWQAEHEHKI  
QI  
AQTVTALCGAEGEPEQLPASVRGNAALTHQYLSDVEAYFEQCMFEQEIQGNNTAPGGV  
LLLLPDIFKSP  
EM  
RR  
SLQARYGSAPTQALQAWKDRHKWRREVDLSGARQYLQRHLPTGDTLLQQRDTQSDFRQ  
WSTHLSTEPL  
KL  
FIDTSHPESELLYLQTLMLNLQIIYAQDNAASAWLAEQEANDSSLFGTLRYGFSPALK  
HALHQEANALLNG  
LG  
DITNLATRIGELNGTLNHQGFADKPMMKALKQPVQDTFKALGQLASSAGKATFESILLAW  
VPIDSRMAVG  
KQ  
QNIVALIQTLLIGQILLDSKARVAIDHTMLAKLKNWISEWQVLNKQISDTRRSWLYPTAY  
KPRKSIASHL  
RA  
LEQKLRLHELSPALLDFQNNQYAKQLQDEIRLHVQSGKAIKDWLTSARRWLDGLGGIAG  
SITWGVIML

NF  
INTAFTYRDLTRDGNFSTKDIGKVTYGLGYSFNLLMAVFVEAPWAVIRDATPVLIDGKNVGILDRSAGYW  
RA  
KGNLAWGDAIRGFRVSMVAMGAFGVAATLELLDIIDDSAGVGTSEEKYWITLKGISVGLMGIGSGAQLV  
AG  
LFPAGTSTAIVMNPWFVSVALLVAGLIYLFATMALNYFKRDSIGLWLSRCCWSKTMDQRYLETANGRNEEI  
SA  
LMEIQLSPQIHVKTTVNYEDRYLGKGDHMSVAVQNGAGIQVRLPNLVRGESVHFNIVSSKRPWGVLPVVK  
IA  
TSIHEAFLNRGQFRKVEQFGMLTNKPTIKASEDCTYPRMPPEKEDLIWETWVPLDEDAIYLELQIWYPYS  
LV  
NAREDDKGYLFQMELSTRGDTAIDGLTAELEVTKSSRAGALTLEIAADTPS-----  
--  
-----  
--  
-----  
--  
-----  
--  
-----  
--  
-----

>A0A2S3TYL3\_9PSED/1-1132

MTDKNGTHQQRAALFPKTPATATSLCPFRGNIAIVPVRYALDRSRYDADPRQLKPLPKDGHWAHLPTL  
KT  
RSYTLRQLYDGYVYVDFETASTLHEYVASATNGHLSRIVWTDMHIGNDQRNGAGEGQPFLLYPRDHRLHI  
AF  
SPMQWTWRFCEHMRSHAPSRALWMKALDLASYCLTMAEPDTLPLDRIAEAVADIDKDRVVEDGRFADSAI  
PT  
ARPPSEGAEPDPLWAPLGADVFWQGSVYDQDSSLVIALDDPLAVFNDLGMQLAADQAAFREWQSVHEHKI  
QI  
AQTVATLCGAESEPEKLPASVHGDALRTHQYLSEVEAYFEQCILEEAQISSSNVPGDFLLLPDMFKSLDM  
RK  
SIETRYGSAPTEQAAQAWKDRHKWRREVDLGSARQYLQOHLPTGDALLQVRDTQSDFLWATHIGTDPL  
KL  
FIDATRPTQLLYLQTIMLNLQIIYAQDNAATNWLAEQEANTSSLFGTLRYGFSPALKQALHQEVDALLNG  
LG  
DVTNLATRIGELNGVLNHQGFADKPWMKALKQPVQNTFKALGELASGAGKATFESVLLAWVPIDSRMALG  
KQ  
QNIVALLRLLIGQILLGSTARVAINEQAVAKLKQWVREWRVLNKQISELVRSWQYPNAYNTRQSTARNL  
QA  
HKHKLRVHELIPALLDFRNNEYAKLLQDEIRQYFQSGKTLAKDWLAHARGWTDRLGGVTGSITWGVVML  
NL  
INTAFLYRDLSRDGFSTKDIGKVTYGLGYSFNLLMAVFVDAPWSIIRDATPALIDGKNVAILDRSSAYW  
KA  
KGNAAWGDAIRGFRVSMVAMGGFGIVAATLELFDVLDDSAKATSEEKGLDLKIVSVGLMGVGSAAQLF  
AG  
IYPASSVTIIVMNPWFGVALLVAGLIYLFATMALNYFKQDSVGVWLRKCCWSRTLDRYRYAETASGENEEI  
RA  
LMEIQLSPQVHVKSTVHYESRYLGKGDYYSVAVQNGAGVQVRLPNRVRGQSVHFNIVSSKRPWGVLPVEK  
ID  
DPLHQAFDRGQFRKVEQFGMLTNKPAGKASEDFTYPRMPPENEDLIWETWVPLDKDATYLELQIWYPTS

LL  
NPGGDDKSYLFQMELGTTGDTAIDGLAAVKLEVKESSRIGTLTLEVAEGTPV-----  
--  
-----  
--  
-----  
--  
-----  
--  
-----  
--

>A0A3M5ELZ7\_PSESX/1-1126  
MTDKSGTHTQRRATFAKTPATATSLCPFRGPDVAIVPVRYALDRSRYDTAPQKLKPLLKGSRWAVMPKL  
KT  
RSYTLRQLYDGYVYVYDETAETLHEYAVSAATGNLSRIVWADTQLGSDRRSGADDGKPFLLYPRNNRLHI  
AF  
SPLQWTWRTCEHLRSNPASRSAWMKALDLKRYCMTMAEPDTLPLNRIAEAVADIDKEHVDDGRFADSTI  
PT  
SKASSEETQPLFSPIGADVFWQGSVEDQHSSLLIALDDPLAIFNDLGMQLAADQAAYRNWQAEYEHRIQI  
AQ  
TVTALCGAEGEPEKLPASVRDNAALHQYLGELEAYFEQCILEEAQISSSNVPGDFLLMPDMFKSLDMRK  
SI  
EMRYGSAPSDEALQAWKDRHKWRREVDLSGARQYLQHLPTGDTLLQQVRDTQSDFRQWSTHLGTEPLKL  
FV  
DTTHPESLLYLQTLMLNLQIIYAQDNAASTWLAEQEANDSSLFGTLRYGFSPALKHALHQEANALLNGLG  
DV  
TNLATRIGELNGTLNHQGFADKPWMKALKQPVDTFKALGQLASSAGKATFESILLAWVPIDSRLAVGKQ  
QN  
IVALIRTLIGQILLDSKARIAIDHKMLAKLKNWISEWQVLNKQISDTRRSWLYPTAYNPRKSIASHLRT  
LE  
QKLRLHELSPALLDFQNEAYARQLQDEIRLYFQSGKAIKDWLATAKRWLDGLGGIAGSITWSVIMLNF  
IN  
TAFTYRDLTRDGFSAKDIGKVTYGLGYSFNLLMAVFVEAPWAVISTAKPLVIGGYNIGILDKSAAYWKA  
RG  
NAVWGDAIRGFRGSMVAMGAFGIAAAALEAIDISNDRSKLKTSAEKNATVIKGLAVAAMGLASLAQLLTG  
IS  
PASRLTAVVMSPWFSLALLIAGTIYLFATMVLNYFKQDSVGWWRKCCWSRTPEHQHANTAQQQNDERS  
LL  
QIQLSPKIYVKSTVHYEDRYLGKGDYISVAVQNGAGIQVRLPGTLRGSSVAVNVISSKRPWGVLPVEKID  
RS  
VQSDFLDRGQFRNVKQFGTLTNKPVGKASEDFTYPLMPPQNEVDIWETWVPLDKDASYLELQIHYPMHLI  
NS  
GQNDTGYSFQLELDTKGSTSFADLTEAELEVKPSSREGILMLEIAN-----  
--  
-----  
--  
-----  
--  
-----  
--  
-----  
--

>A0A3M4YCC5\_9PSED/1-1142

MHTAGDIARFCAEIPCMIEKSGTHTQRRRAATFAKTPATATSLCPFRGPDVAIVPVRYALDRSRYDAAPQK  
LK  
PLLTGSRWAVMPKLKTRSYTLRQLYDGYVYVYDETAETLHEYAVSAATGNLSRIVWTDAQLGSNQRSGGS  
DA  
KPFLLYPRSNLLRIAFSAQQWTWRICEHLRSNPESRSSWMKALDLKRYCMTMAEPDTLPLNRIAEAVADI  
DK  
EHVVDDDRFADSAIPTHESSSEETQPLFSPIGADVFWQGSVEDQDSSLLIALDDPLAIFNDLGMQLAGDQ  
AA  
YRNWQAEHEHKLQIAQTVTTLCGAESQPEKLPASVRDNAALTHQYLSDVEAYFEQCMFEQEIQGNNTAPG  
GV  
LLLDPDIFKSPERMRSIEMRYGSAPSDDALQAWKDRHKWRREVDLSGARQYLQOHLPTGDTLLQQVRDTQS  
DF  
RQWTTHLGTEPLQLFVDTTHPESLLYLQTLMLNLQIIYAQDNAASAWLAEQEANDSSLFGTLRYGFSPAL  
KH  
ALHQEANALLNGLGDVTNLATRIGELNGTLNHQGFADKPWMKALKQPVQDTFKALSQCLASSAGKGTFESE  
LL  
AWVPIDSRLAVGKQONIVALIRTLIGQILLDSKARIAIDHNMLAKLKNWISEWQVLNKQISDTRRSWLY  
PT  
AYNPRKSIASHLRALQKLRRLHELSPALLDYQNNQYAKQLQDEIRLHFQSGKAIKDWLSTARRWLDGL  
GG  
IAGSITWGVIMLNFINTAFTYRDLTRDGDFAKDIGKVTYGLGYSFNLLMAVFVEAPWAVISTAKPLSIG  
GY  
DIGILDKSAAYWKARDNAVWGDALRGFRGSMVAMGAFGIAAATLELIDYEDLTKLKTTEEIISARIKFG  
SV  
GLMAVGSIFQLAAGISPASSFALIAMSSWFSVTILLIGAIYLLATMTLNYFKQDSIGWWLRRCSWSKSKK  
YR  
YVVDAGGQLEEKLALLTIQLSPQIHVKSTTRDENHYFGRDTPYNAPVQYGAGIQILLPSAVRGQSVHFNI  
IS  
TKRPLGVLPVTKIDEPILYPFLDRGQFKKVGQFKNLVNQPARKAQEDFTFPLMPPEGEDVVWETWVPLEN  
DA  
TYLELQIWYPDSLIPDQDQDVGYLQLELSSKGDTAVDGLANTELEIKTYSRISALTLEIAE-----  
--  
-----  
--  
-----  
--  
-----  
--  
-----  
--  
-----

>S3M9A1\_PSESY/1-1128

MTDKSGTHTQRRRAATFAKTPATATSLCPFRGPDVAIVPVRYALDRSRYDAAPQKLPKLLTGSRWAVMPKL  
KT  
RSYTLRQLYDGYVYVYDETAETLHEYAVSAATGNLSRIVWTDAQLGSNQRSGGSDAKPFLLYPRSNLLRI  
AF  
SAQQWTWRICEHLRSNPASRTSWMKALDLKRYCMTMAEPDTLPLNRIAEAVADIDKEHVDDGRFADSAI  
PA  
ARPPSDSDEGKALFSPIGADVFWQGSVEDQDSSLLIALDDPLAIFNDLGMQLAADQAAYRNWQAEHEHKI  
QI  
AQTVTALCGAEGEPEKLPASVRDNAALTHQYLSDVEAYFEQCTFEQEIQGNNTAPGGVLLLDPDIFKSPEM

RR  
SIEMRYGSAPSDDALQAWKDHHKWRREVDLSGARQYLQQHMPTGDTLLQQVRDTQSDFQQWAIHLGTEPL  
KL  
FVDPTHPESELLYLQTLMLNLQIIYAQDNAASAWLAEQEANDSSLFGTLRYGFSPALKHALHQEANALLNS  
LG  
DVTNLATRIGELNGTLNHQGFADKPWMKALKQPVDQTFKALGQLASNAGKATFESILLAWVPIDSRLAVG  
KQ  
QNIVALIRTLIGQILLDSKARIAINHNMLAKLKNWISEWRVLNKQISDTRRSWLYPTAYNPRKSIASHL  
RA  
LEQKLRLHELSPALLDYQNNQYAKQLQDEIRLHFQSGKAIADWLSTARRWLDGLGGIAGSITWGVIML  
NF  
INTAFTYRDLTRDGFSAKDIGKVTYGLGYSFNLLMAVFVEAPWAVIRDAKPVLIDGKNVIGILDRSASYW  
RA  
KGNLAWGDAIRGFRVSMVAMGAFGVAAVMLEVIDIRDDWNKLETSAEKNATIIKGAASAMGLGSLAQLL  
VG  
ISPASKLTILVMSPWFSFALLVTGTIYLLATMALNYFKQDRVGWWRKCCWSRTPQYRHPETPQGHYDEI  
RN  
LLEIQLGPQLHVKSTTHYEDRYLGKGDYFSATIQNGAGIQLRLPNILRGCSVNFNVISSKRPWGIMPVNK  
ID  
QQIYQDFLDRGQFRATSQFGMLTEKRIEHVHKDFTFPLMPPEGKDVIVETWVPLEQDARYLELQIWYPEN  
LI  
CTGVEDTGYLFIQLDQGHSTFEGSSAADLEVKSSNRLGFMTLEIAE-----  
--  
-----  
--  
-----  
--  
-----  
--  
-----  
--  
-----

>A0A437RXL6\_PSESY/1-1130  
MTDKSGTHTQRRATFAKTPATATSLCPRFGPDVAIVPVRYALDRSRYDTAPQKLKPLLKGSRWAVMPKL  
KT  
RSYTLRQLYDGYVYVYDETAETLHEYVVSAAATGNLSRIVWTDALGSDRRSGADDGKPFLLYPRNNLLRI  
AF  
SAQQWTRICEHLRSNPASRASWMKALDLKRYCMTMAEPDTLPLNRIAEAVADIDKEHVDDGRFADSAI  
PT  
SKASSEETQPLFSPIGSDVFWQGSVEDQHSSLLIALDDPLATFNDLGMQLAADQAAYRNWQAEHEHKIQI  
AQ  
TVTALCGAESEPEKLPTSVRDNAALTHQYLGELEAYFEQCILEEAQISSSNVPGDFLLMPDMFKSLDMRK  
SI  
EMRYGSAPSDEALQAWKDRHKWRREVDLSGARQYLQHLPTGDTLLQQVRDTQSDFRQWSTHLGTEPLKL  
FV  
DTTHPESELLYLQTLMLNLQIIYAQDNAASAWLAEQEANDSSLFGTLRYGFSPALKHALHQEANALLNGLG  
DV  
TNLATRIGELNGTLNHQGFADKPWMKALKQPVDQTFKALGQLASSAGKATFESILLAWVPIDSRLAVGKQ  
QN  
IVALIRTLIGQILLDSKARIAIDHKMLAKLKNWISEWQVLNKQISDTRRSWLYPTAYNPRKSIASHLRT  
LE  
QKLRLHELSPALLDFQNNQYAKQLQGEIRLYFQSGKAITKDWLATAKRWLDGLGGIAGSITWSVIMLNF

IN  
TAFTYRDLTRDGDFAKDIGKVTYGLGYSFNLLMAVFVEAPWAIIRDATPVLIDGKNVGILDRSAGYWRA  
KG  
NAAWSDAIRGFRVSMVAMGGFGLAAVTLELFDVTNDFYAAKTSEEKNAIIVKGISIFAMGVGSTFQLMAG  
LS  
PASTFTVAMSPWFSVALLVIGSIYLFITTLALSIFKQDSVGVWLRKCCWSRTLDYRYPETAEGESEEVRA  
LM  
EIQLSPIHVKSTVHYENRYLGKGDYYSVAVQNGAGVQVRLPKLVRGESVHFNIVSSKRPWGVLPVEKID  
DP  
LHQTFLDGQFRKAKQFGTLTNKPAGKASEDFTYPLMPENEDLIWETWVPLHKDATYLELQIWYPANLI  
NP  
GEDDRSYLFQMELGTRGDTAIDGLAAVELEVKASSRIGTLTLEVAEGTPV-----  
--  
-----  
--  
-----  
--  
-----  
--  
-----  
--  
-----

>A0A3M5W6Z9\_PSESY/1-1130

MTDKSGTHTQRRATFAKTPATATSLCPFRGPDVAIVPVRYALDRSRYDAAPQKLKPLLKGSRWAVMPKL  
KT  
RSYTLRQLYDGYVYVYDETAETLHEYAVSAASGNLSHIVWTDALGSDQRSGGSDAKPFLLYPRNLLRI  
AF  
SAQQWTWRICEHLRSNPASRASWMKMLDLKRYCMTMAEPDTLPLNRIAEAVADIDKEHVVEDDRFADSAI  
PT  
HESSSEENQPLFSPIGADVFWQGSVEDQDSSLLIALDDPLAIFNDLGMQLAADQAAYRNWQAEHEHKLQI  
AQ  
TVTTLCGAEGEPEKLPESVRDNAALTHQYLGELEAYFEQCILEEAQISSSNVPGDFLLMPDMFKSLDMRK  
SI  
EMRYGSAPSDEALQAWKDRHKWRREVDLSGARQYLQHLPTGDTLLQQVRDTQSDFFQQWAIHLGTEPLKL  
FV  
DTTHPESLLYLQTLMLNLQIIYAQDNAASAWLAEQEANDSSLFGTLRYGFSPALKHALHQEANALLNGLG  
DI  
TNLATRIGELNGTLNHQGFADKPMKALKQPVDTFKALGQLASNAGKATFESILLAWPIDSRSLAVGKQ  
QN  
IVALIRTLIGQILLDSKARIAIDHTMLAKLKNWINEWRLNKQISDTRRSWLYPTAYNPRKSIASHLRA  
LE  
QKLRLHELSPALLDFQNNQYAKQLQDEIRLHFQSGKAITKEWLSTARRWLDGLGGIAGSVTWGVIMLNF  
IN  
TAFTYRDLTRDGDFAKDIGKVTYGLGYSFNLLMAVFVEAPWAVIRDAKPLSIGGYNIGILDKSAAYWKA  
RG  
NAVWGD AIRGFRVSMVAMGGFGLAAVTLEIFDVADDFYAAKTPEEKNV IIVKGISVFTMGVSTFQLMGG  
LS  
PASAFATVAMSSWFSVALLIIGSIYLFITMTLNYFKQDSVGVWLRKCCWSRTLDYRYAETAQGEHEEVRA  
LM  
EIKLSPIHVKSTVYYENRYLGKGDHYSVAVQNGAGVQVHLPNLIRGQSVHFNIVSSKRPWGVLPVEKID  
DP  
LHQTFLDGQFRKAEQFGKLTNTPPGKASEDFTYPLMPPDNEDLIWETWVPLDKDATYLELQIWYPASLL

DP  
GEEDRSYLFQMQLSPKGDTAIDGLAAVELEVKTSNRAGTLTLEVAEGTPL-----  
--  
-----  
--  
-----  
--  
-----  
--  
-----  
--

>A0A437RU29\_PSESY/1-1130  
MTDKSGTHTQRRATFAKTPATATSLCPFRGPDVAIVPVRYALDRSRYDTAPQKLKPLLKGSRWAVMPKL  
KT  
RSYTLRQLYDGYVYVYDETAETLHEYAVSAATGNLSRIVWTDQTLGSDRRSGADDGKPFLLYPRNNRLHI  
AF  
SSLQWTWRTCEHLRSNPASRASWMKALDLKRYCMTMAEPDTLPLNRIAEAVADIDKEHVDDDRFADSEI  
PT  
SKASSEETQPLFSPIGADVFWQGSVEDQHSSLLIALDDPLAIFNDLGMQLAADQAAYRNWQAEHEHKIQI  
AQ  
TVTALCGAESEPEKLPTSVRDNAALHQYLGEEAYFEQCILEEAQISSSNVPGDFLLMPDMFKSLDMRK  
SL  
EMRYGSAPADEALQAWKDRHKWRREVDLSGARQYLQHLPTGDTLLQQVRDTQSDFRQWSTHLGTEPLKL  
FV  
DTTHPESLLYLQTLMLNLQIIYAQDNAASTWLAEQEANDSSLFGTLRYGFSPALKHALHQEANALLNGLG  
DV  
TNLATRIGELNGTLNHQGFADKPWMKALKQPVDQTFKALGQLASSAGKATFESILLAWVPIDSRLAVGKQ  
QN  
IVALIRTLIGQILLDSKARIAIDHKMLAKLKTWISEWQVLNKQISDTRRSWLYPTAYNPRKSIASHLRT  
LE  
QKLRLHELSPALLDFQNEYPARQLQDEIRLHFQSGKAIKDWLATAKRWLDGLGGIAGSITWSVIMLNF  
IN  
TAFTYRDLTRDGFSAKDIGKVTYGLGYSFNLLMAVFVEAPWAVISTAKPLVIGGYNIGILDKSAAYWKA  
RG  
NAIWGDAIRGFRGSMVAMGAFGIAAATLELFDVLDDFYAAKTSDEKHGLRIKEVAVFLMGLGSSAQLLAG  
VF  
PASAFTIIAMSSWFSVALMAVGFIYLLATMTLNYFKQDSVGWWRKCCWSRTIDYRYDETARGKNEEISA  
LM  
EIQLSPRVHVKSTVRYEDRYLGKGDYMSVAVQTGAGVQVYFPHFLRGKSVHFNIIVSSKRPWGVLPVEKID  
TP  
LYEAFLNRGKFRKVEQFGMLTNKPTAKASEDFTYPLMPPENEDLIWETWVPLDKEATFLELQLWYPYDFI  
NS  
GEDDRSYLFQMELGTRGDTSIDGLTAIELAVKASSRTGSLTLEVAEGTPI-----  
--  
-----  
--  
-----  
--  
-----  
--  
-----  
--

>A0A193SMH5\_9PSED/1-1125

MTDKSGTHTQRRRAATFAKTPATATSLCPFRGPDVAIVPVRYALDRSRYDTAPQKLKPLLKGSRWAVMPKL  
KT  
RSYTLRQLYDGYVYVYDETAETLHEYAVSAATGNLSRIVWTDQLGSDRRSGADDGKPFLLYPRNNLLRI  
AF  
SAQQWTRICEHLRSNPASRASWMKALDLKRYCMTMAEPDTLPLNRVAEAVADIDKEHVDDGRFADSAI  
PT  
SKASSEETQPLFSPIGADVFWQGSVEDQHSSLLIALDDPLAIFNDLGMQLAADQAAYRNWQAEHEHKIQI  
AQ  
TVTALCGAESEPEKLPSTVRDNAALTHQYLGELEAYFEQCILEEAQISSSNVPGDFLLTPDMFKSLDMRK  
SL  
EMRYGSAPADEALQAWKDRHKWRREVDLSGARQYLQQHLPTGDTLLQQVRDTQSDFRQWSTHLGTEPLKL  
FV  
DTTHPESLLYLQTLMLNLQIIYAQDNAASTWLAEQEANDSSLFGTLRYGFSPALKHALHQEANALLNGLG  
DV  
TNLATRIGELNGTLNHQGFADKPWMKALKHPAQDTFKALSQLASSGKATFESILLAWVPIDSRLAVGKQQ  
NI  
VALIRTLIGQILLDSKARIAIDHKMLAKLKTWISEWQVLNKQISDTRRSWLYPTAYNPRKSIASHLRML  
EQ  
KLRLHELSPALLDFQNEAYARQLQDEIRLHFQSGKAIKDWLATAKRWLDGLGGIAGSITWSVIMLNFI  
NT  
AFTYRDLTRDGDFAKDIGKVTYGLGYSFNLLMAVFVEAPWAVISTAKPLVIGGYNIGILDKSAAYWKAR  
GN  
AVWGDARRGFRGSMVAMGAFGIAAAALEAIDISNDRSKLKTSAEKNATVIKGLAVAAMGLASLAQLLTGI  
SP  
ASRLTAVVMSPLFSLALLIAGTIYLFATMVLNYFKQDSVGGWLRKCCWSRTPEHQHANTAQQQONDEIRSL  
LQ  
IQLSPQIYVKSTVHYEDRYLGKGDYISVAVQNGAGIQVRLPGTLRGSSVAVNVISSKRPWGVLPVEKIDR  
SV  
QSDFLDRGQFRNVKQFGTLTNKPVGKTYEDFTYPLMPPQNEVDVIWETWVPLDKDASYLELQIHYPMHLIN  
SG  
QNDTGYSFQLELDAKGSTSFADLTEAELEVKSSSREGILMLEIAN-----  
--  
-----  
--  
-----  
--  
-----  
--  
-----  
--  
-----

>A0A2V0QJK8\_PSESF/1-929

MLHMTDKNGTHQRRRAALFPKTPATATSLCPFRGPNIIVPVRYALDRSRYDVPDPRQLKPLPKDGQWARL  
PK  
LKTRSYYTLRQLYDGYVYVYFDETAGTLHEYAASASDGHLRSRIVWTDHIGNDQRNGAGEGQPFLLYPRDNR  
LH  
IAFSPMQWTWRMCEHMRSHAPSRLWMKALDLASYCLTMAEPDTLPLDRIAEAVADIDKDRVDDGRFAD  
SA  
IPTARPPSEGAEPDPLWAPLGADVFWQGSVYDQDSSLVIALDDPLAVFNDLGMQLAADQAAFREWQSAHE  
HK  
IQIAQTVATLCGAESEPEKLPASVRGDALRMHRYLSEVEAYFEQCFEDAQIGSNTVPGLLLLLPDVFKS

PD  
MRRAIQARYGSAPTDEAAQAWKDRHKWRREVDLGSARQYLQQHLPTGDALLQQVRDTQSDFQLWATHIGT  
DP  
LKLFDTRPTQLLYLQTIMLNLQIIYAQDSAANAWLGEQEANTSSLFGTLRYGFSPALKQALHQEADTL  
LN  
GLGDVTNLATRIGELNGVLNHQGFADKPWMKALKQPVQGTFFKALGELASGAGKATFESVLLAWVPIDSRM  
AL  
GKRQNIIVALLRLLIGQILFDSTARVAINEQAVTKLKQWVLEWQVLNKQISDIRRRWLYPNAYNTRQSTA  
RN  
LQAHKHKLRVHELIPALLDFQNNEYARLLQDEIRQYFQSGKTLAKDWLARAKGWTDRGGTASSITWGV  
VM  
LNLINTAFLYRDLTRDGFSAKDIGKVTYGLGYSFNLLMAVFVEAPWAIISTAKPLVIGGYDVGILDKSA  
AY  
WKARGNAVWGD AIRGFRGSMVAMGGFGIVAATLEVFDVLDSDSAGAKTSEEKDWMLKIVSVGLMGVGSAA  
QL  
FAGIYPASTVAIIVMNPWFVAILVAGLIYLFATMALNYFKQDSIGWWLRKCCWSRTLDPYPPVSG-----  
---  
-----  
---  
-----  
---  
-----  
---  
-----  
---  
-----  
---  
-----  
---  
-----  
---  
-----

>A0A3M5WR41\_9PSED/1-1144  
MHTTRDIARFCAEIPCMTDKSGTHTQRRRAATFAKTPATATSLCPFRGPDVAIVPVRYALDRSRYDAAPEK  
LK  
PLLKGSQWAVMPKLKTRSYTLRQLYDGYVYVYDETAGTFHEYVSSAANGYLSRIIWTDAQIGSDRRSGAD  
DG  
KPFLLYPRNNRLHIAFSAQQWTRICEHLRSNPASRASWMKALDLKRYCMTMAEPDTLPLNHIAEAVADI  
DK  
EHVVDDDRFADSAIPAARPPSDSDEGKALFSPIGADVFWQGSVEDKNSSLLIALDDPLAIFNDLGMQLAA  
DQ  
AAYRNWQAEHEHKIQIAQTVTTL CGAEGEPEKLPASVRGNAAL THQYLGELEAYFEQCIFEEAQISSNV  
PG  
DFLLMPDMFKSLDMRKSIEMRYGSAPSDQALQAWKDRHKWRREVDLSGARAYLQQHLPTGDTLLQQVRDT  
QS  
DFRQWSTHLGTEPLKLFIDTSHPESELLYLQTLMLNLQIIYAQDNAASAWLAEQEANDSSLFGTLRYGFSP  
AL  
KHALHQEANALLNGLDITNLATRIGELNGTLNHQGFADKPWMKALKQPVQDTFKALGQLASDAGKATFE  
SI  
LLAWVPIDSR LAVGKQQNIIVALIRLLIGQILLGSTARIAIDHNMLAKLKTWISEWQVLNKQISDTRRSW  
LY  
PTAYNPRKSIASHLRAL EEKLRRLHEL SMPALLDYQNNQYAKQLQDEIRLHFQSGKAITKDWTGARRWLD

GL  
GGIAGSITWGVIMLNFINTAFTYRDLTRDGNFSTKDIGKVTYGLGYSFNLLMAVFVEAPWAVISTAKPLS  
IG  
GYDIGILDKSAAYWKARGNAVWGDAIRGFRGSMVAMGAFGIAAATLELIDIYEDLTKLKTTEEIISARIK  
FG  
SVGFMAVGSIFQLAAGISPASSFALVAMSSWFSVTILLIGAIYLLATMMLNYFKQDSVGWLLRRCWSWSKS  
KN  
YRYVVDAGGQLEEKLALLTIQLSPQIYVKSTTRDENHYFGRDTSYNAPVQYGAGIQILLPSAVRGQSVHF  
NI  
ISSKRPLGVLPVTKIDEPI LHPFLDRGQFKEVGQFKKLINQPARKAQEDFTFPLMPPEGEDVVWETWVPL  
EN  
DATYLELQIWYPNSLIQPNQKDVGYLFQLELSNKGDTAVDGLANAEELEIKTYSRFSALTLEIAE-----  
--  
-----  
--  
-----  
--  
-----  
--  
-----  
--  
-----

>A0A2S3TS46\_9PSED/1-1132

MTDKYGTHQQRAALFPKTPATATSLCPFRGNIAIVPVRYALDRSRYDVPDPRQLKPLPKDGQWARLPTL  
KT  
RSYTLRQLYDGYVYVDFETAGTLHEYAASASDGHL SRIVWSDAHIGNDQRNGAGEGQPFLLYPRDNRLHI  
AF  
SPMQWTWRMCEHMRSNATSRTLWMKAVDLASYCLTMAEPDTLPLDRIAEAVADIDKDRVDDGRFADSSI  
PT  
ARPPSEGAEPDPLWAPLGADVFWQGSVYDQDSSLVIALDDPLAVFNDLGMQLAADQAAFREWQSAHEHKI  
QI  
AQTVATLCGAESEPEKLPASVRGDALRTHQYLSEVEAYFEQCDFEDAQIGSNTVPGLLLLLPDVFKSPDM  
RR  
AIQARYGSAPTDEGAQAWKDRHKWRREVDLSSARQYLLQHLPTGDKRLQQVRDTQSDFQLWATHIGTDPL  
KL  
FIDTTRPTQLLYLQTIMLNLQIIYAQDSAANAWLAEQEANTSSLFGTLRYGFSPALKQALHQEADTLLNG  
LG  
DVTNLATRIGELNGVLNHQGFADKPWMKALKQPVDTFKALGELASGAGKATFESVLLAWVPIDSRMALG  
KQ  
QNI VALLR TLLIGQILLDSTVRVAINEQAVTKLKQWVREWRVLNKQISELVRSWQYPNAYNTRQSTARNL  
QA  
HKHKL RVHEL SIPALLDFQNSEYAKLLQDEIRQYFQSGKTLAKDWLARA KGWTDRLGGTAGSITWGVVML  
NL  
INTAFLYRDLTRDGFSTKDIGKVTYGLGYSFNLLMAVFVEAPWSVIREATPVLIDGKSVAILDRSSAYW  
KA  
KGNATWGDAIRGFRVSMVAMGGFGLAAVTLELFDITDDYYAAKTSEEKNSITVKGISVVFAMGVGSTFQLL  
SG  
LSPASAFTIVTMSPWFSVALLVIGSIYLF TTMALNYFKQDSVGWLLRKCCWSRTL DRYAETAEGEHEEV  
RA  
LMEIQLSQVHVKSTVNYENRYLGKGDYYSVAVQNGAGVQVRLPNVLHGQTVHFNVISSKRPLGVLTIEK  
ID  
QPIHEAFLDRGQFRNTEQFGTLTNKPAGKASEDFTYPLMPENEDLIWETWVPLDKDATYLELQLWYPKN

LI  
DPGEDRSYLFQMELGINGDTAIDGLAAVELEVKASSRIGALTLEVAEGTPV-----  
--  
-----  
--  
-----  
--  
-----  
--  
-----

>A0A2S4J625\_PSESY/1-1130  
MTDKSGTHTQRRATFAKTPATATSLCPFRGPDVAIVPVRYALDRSRYDTAPQKLKPLLKGSRWAVMPKL  
KT  
RSYTLRQLYDGYVYVYDETAETLHEYAVSAASGNLSRIIWTDACLQSDQRSGGSDAKPFLLYPRSNLLHI  
AF  
SPQQWTWRICEHLRSNPASRTSWMKALDLKRYCMTMAEPHTLPLNRIAEAVADIDKEHVVEDDRFADSAI  
PT  
HESSEENQPLFSPIGADVFWQGSVEDQDSSLLIALDDPLAIFNDLGMQLAADQAAYRNWQAEHEHKLQI  
AQ  
TVTALCGAEGEPEKLPASVRDNAALHQYLSVVEAYFEQCMFEQEQIGNNTAPGGVLLLLPDIFKSPERM  
SI  
EMRYGSAPSDDALQAWKDRQKWRREVDLSGARQYLQHLPTGDTLLQQVRDTQSDFRQWSTHLGTEPLKL  
FV  
DTTHPESLLYLQTVMLNLQIIYAQDNAASAWLAEQEANDSSLFGTLRYGFSPALKHALHQEANALLNGLG  
DI  
TNLATRIGELNGTLNHQGFADKPWMKALKQPVDTFKALGQLASNAGKATFESILLAWVPIDSRLAVGKQ  
QN  
IVVLIRTLIGQILLDSKARIAIDQKMFTKLKSWISEWRVLNKQISDTRRSWLYPTAYNPRKSIASHLRA  
LE  
QELRLHELSPSLLDYQNNQYAKQLQDEIRLHFQSGKAITKEWLGTTARRWLDGLGGIAGSITWGVIMLNF  
IN  
TAFTYRDLTRDGFSAKDIGKVTYGLGYSFNLLMAVFVEAPWAVIRDATPLSVGGYNIGILDKSAAYWKA  
RG  
NAVWGDAIRGFRVSMVAMGGFGLAAVTLEIFDVADDFYAAKTPEEKVIVKGISVFTMGVGFSTFQLMGG  
LS  
PASAFATVAMSSWFSVALLIIGSIYLFITMTLNYFKQDSVGVWLRKCCWSRTLDRYAETAQGEHEEVRA  
LM  
EIKLSPQVYVKSTVYYENRYLGKGDHYSVAVQNGAGVQVHLPNLIRGQSVHFNIIVSSKRPWGVLPVEKID  
DP  
LHQTFLDRGQFRKAEQFGKLTNTPLGKASEDFTYPLMPPDNEDLIWETWVPLDKDATYLELQIWYPASLL  
DP  
GEEDRSYLFQMQLSPKGDTAIDGLAAVELEVKTSNRAGTLTLEVAEGTPL-----  
--  
-----  
--  
-----  
--  
-----  
--  
-----

>A0A3R8VN89\_9PSED/1-1138

MTDKHGTPEQRRNVLFERTPATETSSCPFKGQEEAIVPVRYALDRSRYDAEPDKLKPLPKTGNWALLPEL  
ET  
RRYTLRQLYDGYVYVDFDETDRTFHEYAVNAADASLTRIVWTD AHLGQDTRRGVGEAKPHLLYPRLNRLHL  
AF  
SPMQWTWRLCEHMRSNADSRATWMKPLDLAGYCITMAEPGTLPLRRIAEAVADIDPGNATPDSRFDDSSV  
PT  
SNTEAGVTQTDVSCKPLFSPVGADVWLGSPDKNSALLIALDDPLAMLNDLGLQLAADQAAYRVWQDEH  
GH  
KLEMAKVVTNLCASSDDPDGLPASVKGDVVRTQRYLQEVDEYLDQLELEEIVVTGGILHDSYVDREFAKS  
PE  
MKSALSEKYGTTDPDRKDFEAWKPRAKWRREVDLKRARAYIATHQPTAEKLLQQIRD TQADFRMWADHIGL  
DP  
AVLFVDTTHVKSLLYLQTVMSELLTVYSQDIDAHWLLEQEKHATSLFGTLRYGFSPAIKEALHQEADRL  
LK  
GMNDYTNLATRAGEINAALNHPDVAEAAWMKKLTQSARDTYSALRELASGKGRVAESIVALIPVDARY  
SK  
GKKKDILALFRSFMIGQVLLDSKHKVAIDAKVGAKLKTWKENYILLDHKITKLNSWVHPRTTYDRKSLS  
HQ  
ISQVQDDIQKHMLQFPIDYQEQQSALALRNQMHAHIESGLKTLKHWEARAKEWIIHLGAGLATTVTWG  
VL  
MMNFINTALLYGELTRDGEFSERDMIKVGYGLGYSLNLLMSV FVETPWAVVKAQPVIIEGKTVGILQRS  
SA  
YWIGRGS AWGNVHGFRVGIVAVGVAGVIAATLEVYDLYEDLKTARTTDESNGIRAKAIAVGAMQLGAI  
AQ  
VIAGLSPSSSVAAAVLSSWFTAALAIAGIVYIIGTVVLNYIQQDSVGVWLRKSSWSISNEHRLQDTPAGH  
AE  
EIRTL LAIQNSPSIFVRSTCEDRLEWVGRSGYIPQTVLNGAWIQISLPSTARGETLRLTIISTERPYGVL  
VT  
EKSKTSIAQQFLNNGRFGSAEHFATIDERYGKNTEEMYFPKVPPSNKPILWQVWVPLPKTAAFIELMIQP  
PA  
GTLISDPGIREYLYQINLKPGGEMTS DGLIKTNLTVQTADPTETISLEIPFGSAGDQS-----  
--  
-----  
--  
-----  
--  
-----  
--  
-----  
--  
-----  
--  
-----

>A0A2V0QS89\_PSESF/1-1132

MTDKNGTHQRRRAALFPKTPATATSLCPFRGNIAIVPVRYALDRSRYDVDPTQLKPLPKDGQWARLPTL  
KT  
RSYTLRQLYDGYVYVDFDETAGTLHEYVVSATNGHLSRILWTD AHLGNDQRNGAGEGQPFLLYPRDHCLHI  
AF  
SPMQWTWRFCEHMRSNATSRTLWMKALGLASYCLTMAEPDTLPLDRIAEAVADIDKERVVDDGRFADSAI  
PT  
ACPLSEDAETHPLWAPLGADVFWQGSVYDQDSSLVIALDDPLAVFNDLGMQLAADQAAFREWQSAHEHKI  
QI  
AQT VATLCGAESEPEKLPASVRGDALRMHQYLSEVEAYFEQCFEEAQIGSNTVPGGLLLLLPDVFKSPDM

RR  
AIQARYGSAPTDEGAQAWKDRHKWRREVDLSSARQYLLQHLPTGDKRLQQVRDTQSDFLWATHIGTDPL  
KL  
FIDTTRPAQLLYLQTIMLNLQIIYAQDNAATNWLAEQEANASTLFGTLRYGFSAAKQALHQEADALLNG  
LG  
DVTNLATRIGELNGVLNHQGFAGKPWMTALKQPVDQTFKALGELASGAGKATFESVLLAWVPIDSRMAG  
KR  
QNIIVALLRTLLIGQILLDSTARVVIDEQAVTKLKQWVREWQVLNKQISDIRRRWLYPNAYNTRQSTARNL  
QA  
HKHKLRVHELIPALLDFRNNEYARLLQDEIRQYFQSGKTLAKDWLARAAGWTDRLGGTAGTITWGVVML  
NL  
INTTFLYRDLTRDGFSTKDIGKVTYGLGYSFNLLMAVFEAPWAIISTAKPLVIGGHVGVILDKSAAYW  
KA  
RGNVWGDPAIRGFRGSMVAMGGFGLAAVALELFDVVDDFYAVKTSEEKNIIVKGISVVFAMGVGSTFQLM  
SG  
LSPASTFTIVAMSPWFSVALLVIGSIYLFITMALNYFKQDSVGVWLRKCCWSTTLDYRYAETAEGEHEEV  
RA  
LMEIQLSPQVHVKSTVNYENRYLGKGDYYSVAVQNGAGVQVRLPNVLRGQTVHFNIISSKRPWGVLP  
IEK  
ID  
QPIHEAFLDRGQFRNTEQFGTLTNKPAGKASEDFTYPRMPLNEDLIWETWVPLDKDATYLELQIWYPAS  
LL  
NLGEDDRSYLFQMELGPRGDTAIDGMAAVELEVKASNRAGMLTLEVAEGTPL-----  
---  
-----  
---  
-----  
---  
-----  
---  
-----  
---

>A0A0Q0DHC8\_9PSED/1-1132  
MTDKNGTRQQRAACFARTPATATSLCPFRGPNVAIVPVRYALDRSRYDVAPGQLKPLPKDGKWARQPPL  
KT  
RSHTLRQLYDGYVYVFDDETADTLHEYAASALSGQLSRIVWAEAQIGNDQRNGASDGKPFIFYPRRNMLHI  
AF  
SPIQWTWRLCEHMRSNAPSRAALWMAKALDLARYCISMAEPHTLPLNRIAEAVADIDQGHVIEDGRLADTSI  
PT  
ARPLSEDPDAQPSWAPLGADVFWQGSVDDQDSALVIALDDPLAVFNDLGMQLAADQAALRDWQSEHEHKI  
QI  
AQTVATLCGAESETDKLPASVRDNTLRTHQYLSELEAYFEQCDFEAAQIGSNTVPGLLFLPDVFKSPDM  
RK  
SIKARYGSPTEEGAQVWDRHKWRREVDLTGAREYLLQHLPTRDRLRQQVRDTQSDFLWSTHIGTEPL  
KL  
FIDTTNPEALLYLQTTMLNLQIIYAQDSAASAWLAEQEINTNSLFGTLRYGFSAAKQALHEEADALING  
LG  
DVTNLATRIGELNGALNHQGFADKPMKALKQPVDQTFKALGELASGAGKATLESILLAWVPIDSHMAG  
KQ  
QNIIVALIRTLLIGQILLDSPARIAINQOMLIKFKQWVREWQVLNRQINDIRRSWLYPTAYNTRQSTSRNL  
HA  
HIQKLRLHELSPALLDFQNNQYAKQLQDEIRQYFQSGKTLTKDWLARAAGWSDKLGGIAGSITWGVVML

NL  
INTAFVYKDLSQDGD FSAKDIGKVMYGLGYSFNLLMVVFVETPWAIISTAKPLVIGGYNVGILDKSAAYW  
KA  
RGNVWGD AIRGFRVSMVAMGGFGIVA AILEIFDVLDDSVGVKTL EEKNW MALKIISVGLTGVASTAQLI  
AG  
FFPAGNLAIIVMSPWFSV SLLVIGLIYLFATMVLNYFKQDSVGVWLRKCCWSRTIDHRHAETAKGESEEI  
RA  
LMEIHLSPQVHVKSTVHHEDRYFGKGDYYSVAVQNGAGIQVHLPTLIRGQSVHFNIASSKRAWGVLPVEK  
ID  
DPLHEAFLDNGQFRKAVQFGTLSNKPAGKASEDFTYPLMPENEDLIWETWVPLDKGATYLELQIWYPAN  
LL  
NPGEDDRSYLFQMELGTRGDTVIGLA AVELEVRASSRIGTLTLEVAEGTPV-----  
--  
-----  
--  
-----  
--  
-----  
--  
-----  
--  
-----

>A0A3M5WHI3\_9PSED/1-1131

MPRMTDKSGTHSQRR AATFAKIPATATSLCPFRKPEVAIVPVRYALDRSRYDAAPEKLP LLKGSRWAVM  
PK  
LKTRSYTLRQLYDGYVYVYDETAETLHEYAVSAATGNLSRIVWTDAQLGSDQRSGGSDGKPFLLYPRNNR  
LH  
IAFSAQQWTRICEHLRSSPESRASW MKALDLKRYCTTMAEPDTLPLNR IAEAVADIDKEYVVD DDFAD  
SA  
IPAARPPSDSDEVKALFSPIGADVFWQGSVEDQDSSLLIALEDPLAIFNDLGMQLAADQAAYRNWQAEHE  
HK  
IQIAQTVTALCGAESEPEKLPASVRGNAAL THQYLS DVEAYFEQCIFEQEIQGNNTAPGGVLLL PDIFKS  
PE  
MRRSLEMRYGSAPSDEALQAWKDRHKWRREVDLSGARAYLQ QHLPTGDTLLQQVRDTQSDFRQWSTHLGT  
EP  
LKL FVDTTHPESLLYLQTVMLNLQIIYAQDSAASAWLAEQEANDSSLFGTLRYGFSPALKHALHQEANAL  
LN  
GLGDITNLATRIGELNGTLNHQGFADKPWMKALKQP VQDTFKALGQLASSAGKATFESILLAWVPIDSRM  
AV  
GKQQNIVALIR TLLIGQILLDSKARIAIDHNMLAKLKNWIS EWRV LNKQISDTRRSWLYPTAYNPRKSIA  
SH  
LRALEQKLRLHEL SMPALLDFQNNQYARQLQDEIRLHFQSGKAITKEWLSTARRWFDGLGGIAGSITWGV  
IM  
LNFINTAFTYRDLTRDGEFS AKDIGKVTYGLGYSFNLLMAVFVEAPWAIIRDATPVLIDGKNV GILDRSA  
GY  
WRACKNAAWSDAVRGFRVSMVAMGAFGIAASTLELIDIYDDLTKTKTTEEATVTRIKFGSVGLMAIGSTF  
QL  
AAGILPTSSYTLVAMNPWFSVA ILLTGVIYLLTNMALNYFKQDSVGVWLRKCSWSKSINYHYSTDADGQL  
EE  
KLALLTIQLSPQVHVKSTTRDEDHYFGRDTPYSAPVQY GAGVQILLPSAVRGQSVHFNIISSKRPLGVLP  
VA  
KIDDPILAPFLDRGQFKKVDQFKKLVNQ PARKAQEDFTFPLMPPESEDVVWETWVPLEKDATYLELQIWY

PD  
SLIRPGQQDVGYL FQLK LDSQGD TAVDGLAHVELEIKASSRISTLTLEMAE-----  
--  
-----  
--  
-----  
--  
-----  
--  
-----  
--

>A0A1I5BKR1\_PSESX/1-1132  
MTDKSGTHSQRAATFAKVPATATSLCPFRKPEVAIVPVRYALDRSRYDAAPQKLKPLLKGSRWAVMPKL  
KT  
RSYTLRQLYDGYVYVYDETAEVLHEYVVSAAATGNLSRIVWTDQIGSDWRS GTDDGKPFLLYPRNNRLHI  
AF  
SPQQWTRICEHLRSNPASRASWMKMLDLKRYCMTMAEPDTLPLNRIAEAVADIDKGHVDDGRFADSAI  
PA  
TRPPSDSNEGKALFSPIGADVFWQGSVEDQDSSLLIALDDPLAIFNDLGMQLAADQAAYRNWQAEHEHKI  
QI  
AQTVTALCGAEGEPEKLPASVRGNAAL THQYLGELEAYFEQCILEEAQISSSNVPGDFLLMPDMFKSPEM  
RR  
SIEMRYGSAPSDEALQAWKDRHKWRREVDLSGARQYLQQHLPTGDTLLQQVRDTQSDFRQWSAHLGTEPL  
KL  
FVDPTHPESELLYLQTLMLNLQIIYAQDNAASAWLAEQEANDSSLFGTLRYGFSPALKHALHQEANALLNG  
LG  
DVTNLATRIGELNGTLNHQGFADKPWMKALKQPVQDTFKALSQ LASSAGKATFESILLAWPIDSR LAVG  
KQ  
QNIVALIRTLLIGQILLDSKARIAVDHTMLAKLKNWISEWRVLNKQISDTRRSWLYPTAYNPRKSIASHL  
RA  
LEQKLRLHEL SMPALLDFQNNQYAKQLQDEIRRHFQSGKTLAKDWLASAKRWIDNLGGIAGSITWGVIML  
NL  
INTAFTYRDLTRDGFSAKDIGKVTYGLGYSFNLLMAVFVEAPWAVIRDATPVLTGKNGVILDRSSAYW  
KA  
KGNAAWSDAIRGFRVSMVAMGGFGLAAVTLELFDVTNDFYAAKTSEEKNAIIVKGISIFAMGVGSTFQMM  
AG  
LSPASTFTIVAMSPWFVSVALLVIGSIYLFITLALS YFKQDSVGVWLRKCCWSRTLDYRYPETAKGESEEV  
RA  
LMEIQLSPQIHVKSTVHYESRYLGKGDYYSVAVQNGAGVQVRLPKLVRGESVHFNI VSSKRPWGVL PVEK  
ID  
DPLHQAF LDRGQFRKAEQFGTLTNNPAGKASEDFTYPLMP PENEDLIWETWLP LDKDATYLELQIWYPSN  
LI  
HLGEEDRGYLFQMELGTKGETAIDGLAAVELEV KASSRIGTLTLEVAEGTPV-----  
--  
-----  
--  
-----  
--  
-----  
--  
-----  
--

>W0HG74\_PSECI/1-1128

MTKKYGTLQERRAARFDKSPSSATCACLYKTADIAIVPVRYALDRSRYDVEPTQLKPLPARGQWSPLPRL  
KT  
RSYTLRQLYDGYVYVDETAGTFHEYSISASDACLTRIVWTQAHLGQDVRRGDGEGHPYLLYPRKNRLHL  
AF  
SPVQWTWRICEHMRSHADSRALWMKPLDLNFCATRNEPGALPLMALATAVADIDKNYVFEDKRFADSSI  
PT  
AGPESQPDQAEQSVFNPLGADVYWLGNVPDRCNSSLVALDDPLGVFNDLGMQLAGDQAAFQTWQHEHEHT  
LQ  
IAQTVTALCGANGDVQKLPASVRGDSARTQHLYLNEMEEYFDQMDLEEMLTMHGNSPGGSLGTMDMYKSAD  
MR  
DALRSRYGRYPSEDDRQAWKDREKWRREVDLKGARAHLHHHLPLSEALLQQVRDTQADFQTWAEYLGNDP  
LK  
LFIDTANPKTLLYLQTVMTDLLMVGQDQQASAWLADQEARGGSLFGTLRYGFSPGLKDALDQEANALLG  
GI  
GDFTNLATRAGELNAVLNHQGFADAAMKTLKQPVQNTFKALRELASGAGKTIAENMLLAWVPVDSRLAL  
GK  
SQNLVALIRNFMIGQILANTPEMIRINEQLASQLKQWKREQRHLIKQIDDTRFNWLYPLDPRERRHLARQ  
LQ  
SQLDALRLHELKIPGLLDFQNNQYAQLLQEEIRAFFKSGLDVAKDWHTRAKAWSERLGGLGAGITWGVIL  
LN  
FINTAFLYEDLTRDGFSGKDIVKVGYSLGYSFNLLMAVFVEAPWAVIREAKPVLIDGKSIGILDRSSAY  
WK  
TQGNNAWGDAIRGFRVTMVALGAFVAVTVLEFVDLFDHDSAKTPEEKTAIVIKALAVIGMGVGGVLHL  
LV  
GLNVSKSLAFFVMNPWFVVGLFVVGAIYLLACLALNYFKKDGIGWWLKKCCWSRSIEFRHADNPEGRIEE  
KR  
SLLEIQLSPQVFKSTVIYEQRYLGKGDYMEVAVPNGAWIQIQLPNAVRGKCIQLNVISSKRPLGILPVA  
KI  
ESSIKTLFEERGQYTHIRKFTKVSNEPPPLGPELHFPIMPENEDVWQVWVPLDKSADYIELQIRYPSD  
VI  
SPGKEERGYLYQIELDKKNGTADGLTTPRLLVSAEHRAQSLTLATPE-----  
--  
-----  
--  
-----  
--  
-----  
--  
-----  
--  
-----

>Q882T7\_PSESM/1-1146

MNTVRKPIPTPRMLSMTDKNGTHRQRAALFPKTPATATSLCPFRGNIAIVPVRYALDRSRYDADPAQLK  
PL  
PKDGQWAHLPTLKRSTYTLRQLYDGYVYVDETAGTLHEYAASASDGHLRSRIVWTDHIGNDQRSGAGEG  
QP  
FVLYPRDHRLHIAFSPLQWTWRMCEHMRSHAPSALWMKALDLASYCLTMAEPDTLPLDRIA EAVADIDK  
DC  
VVEDGRFADSAIPSVRPPSEGAEPYPLWAPLGADVFWQGSVYDQDSSLVIALNDPLAVFNDLGMQLAADQ  
AA  
FREWQSAHEHKIQIAQTVATLCGAESEAEKLPASVRGDALRTHQYLSEVEAYFEQCILEEAQISSSNVPG

DF  
LLLPMFKSLDMRKSIIETRYGSAPTDEGAQAWKDRHKWRREVDLSSARQYLLQHLPTGDKRLQQVRDTQS  
DF  
QHWAAHIGTEPLKLFIDTTHPKTLLYLQTIMLNLQIIYAQDSAANAWLAEQEANTSSLFGTLRYGFSPAL  
KH  
ALHQEADALLNGLGDVTNLATRIGELNGVLNHQGFADKPWMKALKQPVDQTFKALGELASGAGKARFESV  
LL  
AWVPIDSRMALGKQQNIVALLRLLIGQILLDSTARVAINEQTVTKLKQWVSEWQVLNKQISELVRSWQY  
PN  
AYNTRQSTARKLQAHKHKLRVHEL SIPALLDFQNEYAKLLQDEIRQYFQSGKTLATDWLARAkwtdrl  
GG  
VAGTITWGVVMLNLINTAFLYRDLTRDGFSTKDIGKVTYGLGYSFNLLMAVFVDAPWSIIRDATPALID  
GK  
NVAILDRSSAYWKAKGNAAWGDAIRGFRVSMVAMGGFGLAAVTLELFDVTDDFHAAKTSEETYGIGIKGF  
SV  
VVMGLGAAAQLMAGISPAGVFTIIAMSPWFSVALLAAGLIYLFATMALNYFKQDSVGVWLRKCCWSITQD  
YR  
YAETAEGKHDEVRALMEIKLSPQVHVKSTVNYENRYLGKNDHYSVAVQNGAGVQVRLPNLLRGLSVHFNI  
VS  
SKRPWGVLPVEKIDQPIHEAFLDHGQFRKVEQFGMFTNKPAGKASEDYTYPRMPPENEDLIWETWVPLDK  
DA  
TYLELQIWYPANLLNPGGDDRSYLFQMELGTKGDTAIDGLAAVELEVKASSRIGALTLEVAEGTPV-----  
--  
-----  
--  
-----  
--  
-----  
--  
-----  
--  
-----  
--  
-----

>A0A3M3ERD0\_PSESX/1-1132  
MTDKSGTLTQRRATFAKTPATATSLCPRFGPDVAIVPVRYALDRSRYDAAPQKLKSLKGSRWAVMPKL  
KT  
RSYTLRQLYDGYVYVYDEDAKTLDEYAVSAATGNLSRIVWTDALGSDQRSGGSDAKPFLLYPRSNLLRI  
AF  
SAQQWTRICEHLRSNPASRTSWMKALDLKRYCMTMAEPHTLPLNRIAEAVADIDKGHVDDGRFADSAI  
PA  
ARPPSDSDEGKALFSPIGADVFWQGSVEDQDSSLLIALDDPLAIFNDLGMQLAADQAAYRNWQAEHEHKL  
QI  
AQTVTTLCGAEGEPEKLPASVRGNAALTHQYLSDVEAYFEQCMFEQEIQGNNTAPGGVLLLDPDIFKSP  
RR  
SIEMRYGSAPSDDALQAWKDRQWRREVDL SGARQYLQHLPTGDTLLQQLRDTQSDFRQWSTHLGTEPL  
KL  
FVDPTHPESELLYLQTLMLNLQIIYAQENAASAWLAEQEANDSSLFGTLRYGFSPALKHALHQEANALLNG  
LG  
DVTNLATRIGELNGTLNHQGF AEKPWMKALKQPVDQTFKALGQLASNAGKATFESILLAWVPIDSRLAVG  
KQ  
QNIVALIRTLLIGQILLDSKARIAIDHNMLAKLKNWISEWRVLNKQISDIRRSWLYPTAYNPRKSIASHL  
RA  
LEQKLRLHEL SMPALLDFQNNQYAKQLQDEIRLHFQSGKAIKDWLSTARRWLDGLGGIAGSITWGVIML

NF  
INTAFTYRDLTRDGDFAKDIGKVTYGLGYSFNLLMAVFVEAPWAVIRDAKPVLIDGKNVGILDRSAGYW  
RA  
KGNAAWSDAIRGFRVSMVAMGGFGLAAVTLELFDVTNDFYAAKTSEEKNAIIVKGISIFAMGVGSTFQLM  
AG  
LSPASTFTIVAMSPWFVSVALLVIGSIYLFITTMALSYIKQDSVGVWLRKCCWSRTLDYRYPETAKGESEEV  
RA  
LMEIQLSPQVHVKSTVHYENRYLGKGDYYSVAVQNGAGVQVRLPKLVRGESVHFNIIVSSKRPWGVLPVEK  
ID  
DPLHQTFLDRGQFRKAEQFGTLTNNPTGKASEDFTYPLMPENEDLIWETWVPLDKDATYLELQIWYPAN  
LI  
NPGEDDRSYLFQMELGTKGDTAIDGLAAVELEVKASSRIGTLTLEVAEGTPV-----  
--  
-----  
--  
-----  
--  
-----  
--  
-----  
--  
-----

>A0A0Q0DMP2\_PSEAP/1-1146  
MHTAGDIARFCAEIPCMIEKSGTHTQRRRAATFAKTPATATSLCPFRGPDVAIVPVRYALDRSRYDAAPQK  
LK  
PLLTGSRWAVMPKPKTRSYTLRQLYDGYVYVYDETAETLHEYAVSAATGNLSRIVWTDAQLGSNQRSGGS  
DA  
KPFLLYPRSNLLRIAFSAQQWTRICEHLRSNPESRSSWMKALDLKRYCMTMAEPDTLPLNRIAEAVADI  
DK  
EHVVDDDRFADSAIPTHESSSEETQPLFSPIGADVFWQGSVEDQDSSLLIALDDPLAIFNDLGMQLAGDQ  
AA  
YRNWQAEHEHKLQIAQTVTTLCGAESEPEKLPASVRDNAALHQYLSDV EAYFEQCTFEQEIQGNNTAPG  
GV  
LLLDPDIFKSPERMRSIEMRYGRAPSDDALQAWNDRHKWRREVDLSGARQYLQOHLPTGDTLLLQVRDTQS  
DF  
QQWAIHLGTEPLKLFVDPTHPESELLYLQTLMLNLQIIYAQDNAASAWLAEQEANDSSLFGTLRYGFSPAL  
KH  
ALHQEANALLNGLGDVTNLATRIGELNGTLNHQGFADKPWMKALKQPQVQDSFKALSQ LASSAGKATFESI  
LL  
AWVPIDSRLAVGKQQNIVALIRTL LIGQILLDSKARIAIDHTMLAKLKNWISEWQVLNKQISDTRRSWLY  
PT  
AYNPRKSIASHLRALEQKRLRHEL SMPALLDYQNNQYAKQLQDEIRLHFQSGKAITKEWLSTVRRWLDGL  
GG  
IAGSITWGVIMLNFINTAFTYRDLTRDGD FSTKDIGKVTYGLGYSFNLLMAVFVEAPWAVIRDAKPLSIG  
GY  
NIGILDKSAAYWKARGNAVWGDAIRGFRGSMVAMGAFGIAAVTLEIFDVADDFYAAKTPEEKVNIIVKGI  
SV  
FTMGVGSTFQLMGGLSPASAFATVAMSSWFSVALLIIGSIYLFITMTLN YFKQDSVGVWLRKCCWSRTLD  
YR  
YAETAQGEHEEVRALMEIKLSPQVYVKSTVYYENRYLGKGDHYSVAVQNGAGVQVHLPNLIRGQSVHFNI  
VS  
SKRPWGVLPVEKIDDPLHQTFLDRGQFRKAEQFGKLTNTPPSKASENFTYPLMPPDNEDLIWETWVPLDK

DA  
TYLELQIWYPASLLDPGEEDRSYLFQMQLSPKGDTAIDGLAAVELEVKTSNRAGTLTLEVAEGTPL-----

---

-----

---

-----

---

-----

---

-----

>Q4ZQN8\_PSEU2/1-1132

MTDKSGTHTQRRATFAKTPATATSLCPFRGPDIAIVPVRYALDRSRYDTAPEKLPKLLKGSRWAVMPKL  
KT

RSYTLRQLYDGYVYVYDETAGTFHEYVSSAADGHLRSRIIWTDQAIGSDQRSGGSDAKPFLLYPRSNLLRI  
AF

SAQQWTWRICEHLRSNPASRTSWMKALDLKRYCMTMAEPDTLPLNRIAEAVADIDKEYVVDDDRFSDSAI  
PA

ARPPSDSDEVKALFSPIGADVFWQGSVEDKNSSLLIALDDPLAIFNDLGMQLAADQAAYRNWQAEHEHKI  
QI

AQTVTTLCGAESEPEKLPASVRGNAALTHQYLSDVEAYFEQCMFEQEIQGNNTAPGGVLLLLPDIFKSPQM  
RR

SLEMYGSAPSDDALQAWKERHKWRREVDLSGARQYLQOHLPTGDTLLKQVRDTQSDFQQWTTHLGTEPL  
KL

FVDTAHPESELLYLQTVMLNLQIIYAQDNAASAWLAEQEANDSSLFGTLRYGFSPALKHALHQEANALLNG  
LG

DITNLATRIGELNGTLNHQGFAEKPWMKALKQPVDTFKALGQLASDAGKATFESILLAWPIDSR LAVG  
KQ

QNIVALIRTLIGQILLDSKARIAIDHTMLAKLKNWISEWQVLNKQISDTRRSWLYPTAYTPRKSIA SHL  
RT

LEEKLRRHESMPALLDFQNNQYAKQLQDEIRLHFQSGKAITKEWLSTARRWLDGLGGIAGSITWGVIML  
NF

INTAFTYRDLTRDGNFSTKDIGKVTYGLGYSFNLLMAVFVEAPWAVISTAKPLSIGGYDIGILDKSAAYW  
KA

RGNAVWGD AIRGFRVSMVAMGGFGLAAVTLEIFDVADDFYAAKTPEEKNV IIVKGISVFTMGVGSTFQLM  
GG

LSPASAFATVAMSSWFSVALLIIGSIYLF TTM TLNYFKQDIVGWWRKCCWSRTLDYRYAETAKGEHEEV  
RA

LMEIQLSPQVHVKSTEHYENRYLGKGDHYSVAVQNGVGVQVHLPNLIRGQSVHFNI VSSKRPWGVLPVEK  
ID

DPLHQAF LDRGQFREVEQFGKLTNTPSGKASEDLTYPLMPENEDLIWETWVPLDKDATYIELQIWYPAN  
LL

NPGEDDRSYLFQMELGPRGDTAIDGLAAVELEVKASNAGTLTLEVAEGTPL-----

---

-----

---

-----

---

-----

---

-----

>A0A1I5GX39\_PSESX/1-1130

MIKSGTHTQRRRAATFAKTPATAISLCPFRGPDVAIVPVRYALDRSRYDAAPQKLKPLLTGSRWAVMPKL  
KT  
RSYTLRQLYDGYVYVYDETAETLHEYAVSAATGNLSRIVWTDQAIGSNQRSGGSDAKPFLLYPRSNLLRI  
AF  
SAQQWTWRICEHLRSNPESRSSWMKALDLKRYCMTMAEPDTLPLNRIAEAVADIDKEHVDDDRFADSAV  
PT  
SESSSEETQPLFSPIGADVFWQGSVEDQDSSLLIALDDPLAIFNDLGMQLAGDQAAYRNWQAEHEHKLQI  
AQ  
TVTTLCGAESEPEKLPASVRDNAALTHQYLSVVEAYFEQCTFEQEQIGNNTAPGGVLLLPIFKSPEMRR  
SI  
EMRYGRAPSDDALQAWNDRHKWRREVDLSGARQYLQQHLPTGDTLLLQVRDTQSDFFQWAIHLGTEPLKL  
FV  
DPTHPESELLYLQTLMLNLQIIYAQDNAASAWLAEQEANDSSLFGTLRYGFSPALKHALHQEANALLNGLG  
DI  
TNLATRIGELNGTLNHQGF AEKPMKALKHPVQHTFKALGQLASNAGKATFESILLAWPIDSR LAVGKQ  
QN  
IVALIRTL LIGQILLDSKARIAIDHNMLAKLKNWISEWQVLNKQISDTRRSWLYPTAYNPRKSIASHLRA  
LE  
QKLRLHEL SMPALLDYQNNRYAKQLQDEIRLHFQSGKAITKEWLSTVRRWLDGLGGIAGSITWGVIMLNF  
IN  
TAFTYRDLTRDGFSAKDIGKVTYGLGYSFNLLMAVFVEAPWAVIRDAKPLSIGGYNIGILDKSAAYWKA  
RD  
NAVWGD AIRGFRGSMVAMGAFGIAAATLELKDVLDFDAARTLEEK TALS VKGASV FVMGAASTVQLTAG  
IS  
PASTITTIAMSSWLSV VLLVTGFIYLF TTIALNYFKQDGVGWLLRCCWSKTVDFRHPETAKGEYEE IQA  
LL  
EIQLSPEVYVKSTVHYEDRYLGKGDYMRVAVQNGAGVQVRLPSLVRGTSLHFNVISSKRPWG LLPVEKID  
RP  
IHENFLNRGQFRRVEQFKILTNEPTGKASEDFTYPLMPPEDEDLIWETWVPLDNNATYLELQIWYPTNLI  
HP  
GEEDRGYLFQIELGTRGD TESDGLAAVELEV KALS RAGTLTLEVAGSRPL-----  
--  
-----  
--  
-----  
--  
-----  
--  
-----  
--  
-----

>A0A2S4JAV2\_PSESY/1-1132

MTDKSGTLTQRRRAATFAKTPATATSLCPFRGPDVAIVPVRYALDRSRYDAAPQKLK SLLKGSRWAVMPKL  
KT  
RSYTLRQLYDGYVYVYDEDAKTLDEYAVSAATGNLSRIVWTDQALGSDQRSGGSDAKPFLLYPRSNLLRI  
AF  
SAQQWTWRICEHLRSNPASRTSWMKALDLKRYCMTMAEPHTLPLNRIAEAVADIDKEHVDDDRFADSAI  
PA  
ARPPSDSDEGKALFSPIGADVFWQGSVEDQDSSLLIALDDPLAIFNDLGMQLAADQAAYRNWQAEHEHKL  
QI  
AQTVTTLCGAEGEPEKLPASVRGNAALTHQYLSVVEAYFEQCMFEQEQIGNNTAPGGVLLLPIFKSPEM

RR  
SIEMRYGSAPSDDALQAWKDRQKWRREVDLSGARQYLQHLPTGDTLLQQLRDTQSDFRQWSTHLGTEPL  
KL  
FVDPTHPESLLYLQTLMLNLQIIYAQENAASAWLAEQEANDSSLFGTLRYGFSPALKHALHQEANALLNG  
LG  
DVTNLATRIGELNGTLNHQGF AEKPWMKALKQP VQDTFKALGQLASNAGKATFESILLAWVPIDSR LAVG  
KQ  
QNIVALIRTLLIGQILLDSKARIAIDHNMLAKLKNWISEWRVLNKQISDIRRSWLYPTAYNPRKSIASHL  
RA  
LEQKLRLHELSPALLDFQNNQYAKQLQDEIRLHFQSGKAIKDWLSTARRWLDGLGGIAGSITWGVIML  
NF  
INTAFTYRDLTRDGFSAKDIGKVTYGLGYSFNLLMAVFVEAPWAVIRDAKPVLIDGKNVGILDRSAGYW  
RA  
KGNAAWSDAIRGFRVSMVAMGGFGLAAVTLELFDVTNDFYAAKTSEEKNAIIVKGISIFAMGVGSTFQLM  
AG  
LSPASTFTIVAMSPWFVSVALLVIGSIYLFITMALSIIKQDSVGGWLRKCCWSRTLDRYPETAKGESEEV  
RA  
LMEIQLSPQVHVKSTVHYENRYLGGDYYSVAVQNGAGVQVRLPKLVRGESVHFNIIVSSKRPWGVLPVEK  
ID  
DPLHQTFDRGQFRKAEQFGTLTNNPTGKASEDFTYPLMPENEDLIWETWVPLDKDATYLELQIWYPAN  
LI  
NPGEDDRSYLFQMELGTKGDTAIDGLAAVELEVKASSRIGTLTLEVAEGTPV-----  
--  
-----  
--  
-----  
--  
-----  
--  
-----  
--

>W0MTQ2\_PSEX/1-1127  
MTDKNGTRQORRAACFDKTPATATSLCPFKGPSIAIVPVRYALDRSRYDADPKQLKPLPKDGKWASLPTL  
KT  
RSYTLRQLYDGYVYVFDETAGTLHEYAVSAADGHLSKIVWSDAQVGSQDRSGGTGDKPFLLYPRSNRLHI  
AF  
SPLQWTWRICEHMRSNPPSRALWMKALDLPRYCITMAEPDTLPLNHIAEAVADVDDKGNVIDDGRFADSAI  
PT  
ARSPSSDEATSLFSPVGADVFWLGSVDDKDSSLLIALDDPLAVFNDLGMQLAADQAAYRNWQAEHEHKIQ  
IA  
QTVTTLCGAESEPEKLPASVRGDAAGTHQYLS DVEAWFDQCIIEEAQINSSSVPGDFLVL PDMFKSLDMR  
KS  
IEARYGSAPSEQDAQVWKDRHKWRREVDFTGARQYLLQHLPAGEKLLQQRDTQSDFRQWSTYLGTEPLK  
LF  
IDTTHPNTLLYLQMILLNLQIIYAQDNAASAWLAEQEANTSSLFGTLRYGFSPALKDALHHEANALLNGL  
GD  
VTNLATRIGELNGALNHQGFADKPWMKALKQP VQDTFKALGDLASGAGKATLESILLAWVPIDSRHAIGK  
KQ  
NIVALIRTLLIGQVLLDSPTRIAINQVFTRLKQWIREWQVLNKQISDTRRSWLYPTAYNTRKSTANHLN  
AL  
RERLRLHELSPALLDFQNKYAKQLQDEIRQYFQTGKAITKDWLAHAKRWIDKLG IAGSITWGVIMAN

FI  
NTALTYRDLTKDGFSLKDIGKVTYGLGYSFNLLMAVFVEAPWAIISTAKPLVIGGYDIGILDQSAAYWK  
AR  
GNAVWGDAIRGFRGSMVAMGAFGVAAATLEVVDIHDDWSKLKTSAEKNATMTKGFATAAMGLGSLAQLLV  
GT  
SPVSRLTIFVMSPWFSVALLVTGAIYLFATMALNYLKQDSVGWWRKSCWSRAPQHRYPETAQQQNDEIR  
GL  
LEIQLGSQLHVKSTVHYEDRYLGKGDYMSVAVQNGVGIQLRLPSAIRGSSVHFNVISSKRPWGLMPVEKI  
EN  
SIHEDFLDRGQLRNTSQFGSLTGKRIEKANEDFTFPRMPENEDVIWETWVPLKQDASYLELQIWYPQNL  
IN  
PGEEDNGYLFQMEPGAQGSTSIDGLTATDLEVKASSRAGFLTLEIAE-----  
--  
-----  
--  
-----  
--  
-----  
--  
-----  
--  
-----

>A0A3M2Y799\_PSESY/1-1195  
MQHTGMSRRMCADVCFHVFLLDVFALNLYLFVYRQIDSRHISWNALLHTAGDIARFCAEIPCMTDKS  
GT  
HTQRRRAATFAKTPATATSLCPFRGPDVAIVPVRYALDRSRYDAAPEKPKLLKGSRWAVMPKPKTRSYTL  
RQ  
LYDGYVYVYDETAETLHEYAVSAATGNLSRIVWTDALGNSQRSGGSDAKPFLLYPRSNLLRIAFSAQQW  
TW  
RICEHLRSNPESRSSWMKALDLKRYCMTMAEPDTLPLNRIAEAVADIDKEYVVDDDRFADSAIPTHESSS  
EE  
NQPLFSPIGADVFWQGSVEHQDSSLLIALDDPLAIFNDLGMQLAADQAAYRNWQAEHEHKLQIAQTVTTL  
CG  
AESEPEKLPASVRDNAALTHQYLSVVEAYFEQCTFEQEIQGNNTAPGGVLLLPDIFKSPERMRSIEMRYG  
RA  
PSDDALQAWNDRHKWRREVDLSGARQYLQOHLPTGDTLLLQVRDTQSDFFQWAIHLGTEPLKLFVDPHTP  
ES  
LLYLQTLMLNLQIIYAQDNAASAWLAEQEANDSSLFGTLRYGFSPALKHALHQEANALLNGLGDITNLAT  
RI  
GELNGTLNHQGFADKPMKALKQPVQDTFKALGQLASSAGKATFESILLAWVPIDSRLAVGKQONIVALI  
RT  
LLIGQILLDSKARIAIDHTMLAKLKNWISEWRVNLKQISDIRRSWLYPTAYNPRKSIASHLRALEQKLRL  
HE  
LSMPALLDYQNNRYAKQLQDEIRLHFQSGKAIKDWLSTARRWLDGLGGIAGSITWGVIMLNFINTAFTY  
RD  
LTRDGFSAKDIGKVTYGLGYSFNLLMAVFVEAPWAVISTAKPLSIGGYDIGILDKSAAYWKARGNVVWG  
DA  
IRGFRGSMVAMGAFGIAAVTLELFDALDDFYAAKTSDEKHGLRIKRVAVFLMGLGSSAQLLAGVFPASTF  
TI  
IAMSSWFSVALMAVGFIYLLATMTLNYFKQDSVGWWRKCCWSRTIDRYDETAKGKNEEVSALEIQLS  
PQ  
AHVKSTVHYEDRYLGKGDYMSVAVQNGAGVQVYFPFLRGKSVHFNIIVSSKRPWGLPVEKIDTPIYEA

LN  
RGKFRKVEQFGMLTNKPTAKASEDFTYPLMPENEDLIWETWVPLDKEATFLELQLWYPSDLINSGEDDR  
SY  
LFQMELGTRGDTSIDGLAAMELAVKASSRTGSLTLEVAEGTPI-----  
--  
-----  
--  
-----  
--

>A0A3M4AS53\_9PSED/1-1148  
MHTAGELPVAAQRMSRMTDKYGTHQORRAALFPKTPATATSLCPFRGPNI AIVPVRYALDRSRYDVDP AQ  
LK  
PLPKDGQWARLPTLKTRSYTLRQLYDGYVYVFD ETAGTLHEYAASASDGHL SRIVWTD A HIGNDQRNGAG  
EG  
QPFLLYPRDHRLHVAFSPMQWTWRMCEHMRSHAPS RALWMKAVDLASYCLTMAEPDTLPLDR IAEAVADI  
DK  
DRVVDDGRFADSAIPTACPPSEGAEPDPLWAPLGAD VFWQGSVYDQDSSLVIALDDPLAVFNDLGMQLAA  
DQ  
AAFREWQSAHEH KIQIAQTVATLCGAESEAEKLPASVRGDALRTHQYLSEVEAYFEQCDFEEAQIGSNTV  
PG  
GLLLL PDVFKSPDMRRAIQARYGSAPSDEGAQAWKDRHKWRREVDLSSARQYLLQHLPTGDKRLQQVRDT  
QS  
DFQLWATHIGTDPLRLFIDTTRPTQLLYLQTIMLNLQIIYAQDS AANAWLAGQEANTSSLFGTLRYGFSP  
AL  
KHALHQEADALLNGLGDVTNLATRIGELNGVLNHQGFADKPWMKALKQP VQDTFKALGELASGAGKATFE  
SV  
LLAWVPIDSRMALGKQONIVALLRLLIGQILLDSTARVAINEQAVTKLKQWVREWRV LNKQISELVR SW  
QY  
PNAYNTRQSTARNLQAHKHKLRVHEL SIPALLDFQNEYAKLLQDEIRQYFQSGKTLTKDWLARA KGWTD  
RL  
GGTAGTITWGVVMLNLINTAFLYRDLTRDGFSTKDIGKV TYGLGYSFNLLMAVFVEAPWSVIRDATPVL  
ID  
GKNVAILDRSSAYWKAKGNTAWSDAIRGFRVSMVAMGGFGIVAATLELFDVLD DSARA KTSKEKNWLDLK  
IV  
SVGLMGVGSAAQLFAGIYPASTVAIIVMNPWF SVALLAAGLIYLFATMALNYFKQDSV GWWLRKCCWSKT  
LD  
YRYAETADGEHEEVRALMEIQLSPQVHVKSTVHYENRYLGKGDHYSVAVQNGAGVQVRLPNLVRGQSVHF  
NI  
VSTKRPWGVLPVAKIDDPLHEAFLDRGQFRKAEQFGTL TNKPAGKASEDFTYPRMPPENEDLIWETWVPL  
DN  
DATYLELQLWYPANLLNPGGDDRSYLFQMELGTKGDTAIDGLAAVELEVKESSRIGALTLEVAEGTPV--  
--  
-----  
--  
-----  
--  
-----  
--  
-----  
--

>A0A0P9JF21\_9PSED/1-1148

MHTAGELPVAAQRISRMTDKNGTHQQRRAALFPKTPATATSLCPFRGPNI AIVPVRYALDRSRYDADPTQ  
LK  
PLPKDGQWARLPTLKTRSYTLRQLYDGYVYVFEDETAGTLHEYAASASDGHL SRIVWTD A HIGNDQRTGAD  
EG  
QPFLLYPREHRLHIAFSPMQWTWRMCEHMRSHAPSRALWMKALDLASYCLTMAAPDTLPLDRITEAVADI  
DK  
DCVVEDGRFADSAIPSTRPPSEDAEPDPLWAPLGADVFWQGSVYDQDSSLVIALDDPLAVFNDLGMQLAA  
DQ  
AAFREWQSAHEHKKIQAQTIATLCGAESEAEKLPASVRGDALRTHQYLSEVEAYFEQCILEEAQISSSNV  
PG  
DFLLL PDMFKSLDMRKS IETRYGSAPTDEGAQAWKDRHKWRREVDLSSARQYLLQHLPTGEKRLQQVRDT  
QS  
DFQHWATHLGTEPLKLFIDTTHPKPLLYLQTIMLNLQIIYAQDSAANAWLAEQEANTSSLFGTLRYGFSP  
AL  
KHALHQEADALLNGLGDVTNLATRIGELNGVLNHRGFADKPWMKALKQPVQDTFKALGELASGAGKARFE  
SV  
LLAWVPIDSRMALGKQONIVALLRLLIGQILLDSTARVAINEQTVTKLKQWVSEWQVLNKQISELVRSW  
QY  
PNAYNTRQSTARNLQAHKHKLRVHEL SIPALLDFQNEYAKLLQDEIRQYFQSGKTLAKDWLARARGWTD  
RL  
GGTAGSITWGVMLNLINTAFLYRDLTRDGFSTKDIGKVTYGLGYSFNLLMAVFVDAPWSIIRDATPAL  
ID  
GKNVAILDRSSAYWKAKGNAAWGDAIRGFRVSMVAMGGFGLAAVTLELFDVTDDFHAAKTSEEEYGLRIK  
WS  
SVLMMGLGSAAQLFAGMFPASAF AIAMNPWF SVALFATGFIYLLATMALNYFKQDSVGVWLRKCCWSIT  
QD  
YRYAETAEGKHEEVRALMEIQLSPQIHVKSTVHYESRYLGKGDYYSVAVQNGAGVQVRLPNLLRGQTVHF  
NV  
ISSKRPWGLTVEKIDQPIYEAFDRGQFRKIEQFGMLTNKPAGKASEDFTYPRMPPENEDLIWETWVPL  
DK  
DATYLELQVWYPENLINPGEDDRSYLFQME LGTNGETAIDGLAAVELEVKASGRIGALTLEVAEGTPV---

-----  
--  
-----  
--  
-----  
--  
-----

>A0A3M3LMH0\_9PSED/1-1132

MTDKNGTRQQRRAACFARTPATATSLCPFRGPNV AIVPVRYALDRSRYDVAPGQLKPLPKDGKWARQPPL  
KT  
RSHTLRQLYDGYVYVFEDETADTLHEYAVSALSGQLSRIVWAEAQIGNDQRNGASDGKPF LFYPRRNMLHI  
AF  
SPIQWTWRLCEHMRSNAPS RALWMKALDLARYCTSMAEPDTLPLDRIAEAVADIDLGHVIDDGRFADTSA  
PT  
ARPLSEDPDAQPSWAPLGADVFWQGSVGDQDSALVIALDDPLAVFNDLGMQLAADQAALRDWQSEHEHKKI  
QI  
AQT VATLCGAESETDKLPASVRDNTLRTHQYLSELEAYFEQCDFEAAQIGSNTVPGGLLFLPDVFKSPDM

RK  
SIKARYGSNPTEEGAQVWVKDRHKWRREVDLTGAREYLLQHLPTRDRLRQQVRDTQSDFRLWSTHIGTEPL  
KL  
FIDTTNPEALLYLQTTMLNLQIIYAQDSAASAWLAEQEINTNSLFGTLRYGFSAAALKQALHEEADALING  
LG  
DVTNLATRIGELNGALNHQGFADKPWMKTLKQPIQDTFKALGELASGAGKATLESILLAWVPIDSRMAG  
KQ  
QNIVALIRTLIGQILLDSPARIEINQOMLIKLKQWVREWQVLNRQINDIRRSWLYPTAYNTRQSTSRNL  
HA  
HIQKRLRHELSPALLDFQNNQYAKQLQDEIRQYFQSGKTLTKDWLAHAKGWSDRLLGGTAGTITWGVVML  
NL  
INTAFLYRDLTRDGFSTKDIGKVTYGLGYSFNLLMAVFVEAPWAIISTAKPLVIGGYDVGILDKSAAYW  
KA  
QGNVWGD AIRGFRGSMVAMGGFGLAAVTLELFDVADDFYAAKTSEEEYGLRVKWSSVLMGLGSAAQLF  
AG  
FFPASAFAIAMNPWSSVALFATGFIYLLATMALNYFKQDSVWLRKCCWSNTANYRYAETADGEHEEV  
RA  
LMEIQLSPQVHVKSTVNYENRYLGKGDYYSVAVQNGAGVQVRLPNVLRGQTVHLNVISSKRPLGVLTVKK  
ID  
PPIYEAFLDRGQFRNTEQFGMLTNKPAGKASEDFTYPRMPENEDLIWETWVPLDKDATYLELQLWYPAN  
LL  
NPGGDDRSYLFQMELGIRGDTAIDGLAAVELEVKASSRIGALPLEVAEGTPV-----  
--  
-----  
--  
-----  
--  
-----  
--  
-----  
--  
-----

>A0A3M3M0I9\_PSESX/1-1142  
MHTAGDIDRFCAEIPCMTDKSGTHTQRRRAATFAKTPATATSLCPFRGPDVAIVPVRYALDRSRYDTAPQK  
LK  
PLLKGSRWAVMPKLKTRSYTLRQLYDGYVYVYDETAETLHEYAVSAATGNLGRIVWADTQLRSDRRSGAD  
DG  
KPFLLYPRNNRLHIAFSPLQWTWRTCEHLRSNPASRSAWMKALDLKRYCMTMAEPDTLPLNRIAEAVADI  
DK  
EHVVDDGRFADSAIPTSASSEETQPLFSPIGADVFWQGSVDDQHSSLLIALDDPLAIFNDLGMQLAADQ  
AA  
YRNWQAEHEHKIQIAQTVTALCGAEGEPEKLPASVRSNAALTHQYLSDVEAYFEQCMFEQEIQGNNTAPG  
GV  
LLLSDVFKSPEMRRSLEMYGSAPADEALQAWKDRHKWRREVDLSGARQYLQHLPTGDTLLQQVRDTQS  
DL  
RQWSTHLGTEPLKLFVDTHPESLLYLQTLMLNLQIIYAQDNAASTWLAEQEANDSSLFGTLRYGFSPAL  
KH  
ALHQEANTLLNGLGDVTNLATRIGELNGTLNHQGFADKQWMKALKQPVDTFKALGQLASSAGKATFESI  
LL  
AWVPIDSRLAVGKQONIIVALIRTLIGQILLDSKARIAIDHKMLAKLKNWISEWQVLNKQISDTRRSWLY  
PT  
AYNSRKSIASHLRTLEQKRLRHELSPALLDFQNNNEYARQLQDEIRLHFQSGKAIKDWLATAKRWLDGL

GG  
IAGSITWSVIMLNFINTAFTYRDLTRDGDGFSKDIGKVTYGLGYSFNLLMAVFVEAPWAVISTAKPLVIG  
GY  
NIGILDKSAAYWKARGNAIWGDAIRGFRGSMVAMGGFGIAAAALEILDIGNDLNDIKTSEERIASEIKIA  
SV  
AMLLGSAIQLSAGIFPTTFLAAFAMASWFSVLLLTGVVYLLATMALNYFKQDSIGWWLRKCCWSKSIE  
YR  
YSTNGEGQLEEKLALLTIQLSPQVYVKSTTRDETRYLGKGDYYSTPEQYGAGVQILLPKAVRGQSVHFNV  
IS  
SKRPWGVLPVKKIDSSIQESFLSRGQFKKTDHFGNLANLPARNAEEDFTFPRMPPESEDLVWETWVPLEK  
EA  
AYLELQIWYSDNLLNSGPQDIGYLFQLELSGKGETAINGVDTTVLEVKSASRINALTLEIAD-----  
--  
-----  
--  
-----  
--  
-----  
--  
-----  
--  
-----

>A0A3M5Z8B9\_9PSED/1-1169  
MSYGRPRTRKFSTCLRNCASRLMNTARNLIQARARCMTDKNGTRQQRRACFARTPATATSLCPFRGPN  
VA  
IVPVRYALDRSRYDVAPGQLKPLPKDGKWTRQPPLKTRSHTLRQLYDGYVYVFEDETADTLHEYAVSALSG  
QL  
SRIVWAEAQIGNDQRNVASDGKPFIFYPRRNTLHIAFSPIQWTWRLCEHMRSNAPSRAIWMKALDLARYC  
TS  
MAEPHTLPLDRIAEAVADIDQGHVIEDGRFADTSVPTARPLSEDPDAQPSWAPLGADVFWQGSVDDQDSA  
LV  
IALDDPLAVFNDLGMQLAADQAALRDWQSEHEHKIQIAQTVATLCGAESETDKLPASVRDNTLRTHQYLS  
EL  
EAYFEQCDFEEAQIGSNTVPGLLLLPDVFKSPDMRRAIQARYGSAPTDEGAQAWKDRHKWRREVDLSSA  
RQ  
YLLQHLPTGDKRLQQVRDTQQDFRLWATHIGTEPLKLFIDTTRPTQLLYLQTIMLNLQIIYAQDSAANAW  
LA  
EQEANTSSSLFGTLRYGFSPALKHALHQEADALLNGLGDVTNLATRIGELNGLVNHQGFADKPWMKSLKQP  
VQ  
DTFKALGELASGAGKARFESVLLAWVPIDSRMALGKQQNIVALLRTLIGQILLDSTARVAINEQAVTKL  
KQ  
WVREWRVNLNKQISELVRSWQYPNAYNTRQSTARNLQAHKHKLRVHELIPALLDFQNEAYAKLLQDEIRQ  
YF  
QSGKTLTKDWLARAAGWTDRLGGTAGTITWGVMLNLINTAFLYRDLTRDGDGFSKDIGKVTYGLGYSFN  
LL  
MAVFVEAPWAIISTAKPLVIGGYDVGILDKSAAYWKAQGNVWGDVWDAIRGFRGSMVAMGGFGLAAVTLELF  
DV  
ADDFYAAKTSEEEYGLRVKWSVLMMLGSAQAQLFAGFFPASAFIIMNPWFVALFATGFIYLLATMA  
LN  
YFKQDSVWLRKCCWSNTANYRYAETADGEHEEVRALMEVQLSPQVHVKSTVNYENRYLGKGDYYSSAV  
QN  
GAGVQVRLPNVLRGQTVHFNVISSKRPLGVLTVKKIDQPIYEAFDRGQFRNTEQFGMLTNKPAGKASED

FT  
YPRMPENEDLIWETWVPLDKDATYLELQLWYPANLLNPGGDDRSYLFQMELGIRGDTAIDGLAAVELEV  
KA  
SSRIGALPLEVAEGTPV-----  
--  
-----  
--  
-----  
--  
-----

>A0A3M3FF31\_PSESX/1-1146  
MHTAGDIARFCAEIPCMTDKSGTHTQRRRAATFAKTPATATSLCPFRGPDVAIVPVRYALDRSRYDTAPQK  
LK  
PLLKGSRWAVMPKLKTRSYTLRQLYDGYVYVYDETAETLHEYAVSAASGNLSRIIWTDAQLGSDQRSGG  
DA  
KPFLLYPRSNLLRIAFSAQQWTWRTCEHLRSSPESRASWMKALDLKRYCMTMAEPDTLPLNRIAEAVADI  
DK  
EYVVDDDRFADSAIPTHESSSEENQPLFSPIGADVFWQGSVEHQDSSLLITLDDPLAIFNDLGMQLAADQ  
AA  
YRNWQAEHEHKLQIAQTVTTLCGAESEPEKLPASVRDNAALHQYLSDVEAYFEQCMFEQEIQGNNTAPG  
GV  
LLLDPDIFKSPERMRSIEMRYGSAPSDDALQAWKDRHKWRREVDLSGARAYLQQHLPTGDTLLQQVRDTQS  
DF  
QQWAIHLGTEPLKLFVDTHHPQSLLYLQTLMLNLQIIYAQDNAASAWLAEQEANDSSLFGTLRYGFSPAL  
KH  
ALHQEANALLNGLGDVTNLATRIGELNGTLNHQGFADKPWMKALKQPVDTFKALGQLASSAGKATFESI  
LL  
AWVPIDSRLAVGKQQNIVALIRTLLIGQILLDSKARIAIDHKMLAKLKNWISEWRVNLKQISDIRRSWLY  
PT  
AYNPRKSIARHLRALEQKLRRLHELSPALLDFQNNQYAKQLQDEIRLHFQSGKAITKEWLSTARRWLDGL  
GG  
IAGSITWGVIMLNFINTAFTYRDLTRDGFSTKDIGKVTYGLGYSFNLLMAVFVEAPWAVIRDAKPLSIG  
GY  
NIGILDKSAAYWKARGNAVWGD AIRGFRVSMVAMGGFGLAAVTLEIFDVADDFYAAKTPEEKNV IIVKGI  
SV  
FTMGVGSTFQLMGGLSPASAFATVAMSSWFSVALLIIGSIYLF TTMTLNYFKQDSVGVWLRKCCWSRTLD  
YR  
YAETAQGEHEEVRALMEIKLSPQVYVKSTVYYENRYLGKGDHYSVAVQNGAGVQVHLPNLIRGQSVHFNI  
VS  
SKRPWGVLPVEKIDDPLHQTFLDRGQFRKAEQFGKLTNTPLGKASEDFTYPLMPPDNEDLIWETWVPLDK  
DA  
TYLELQIWYPASLLDPGEEDRSYLFQMQLSPKGD TAIDGLAAVELEVKTSNRAGTLTLEVAEGTPL----  
--  
-----  
--  
-----  
--  
-----  
--  
-----  
--  
-----

>A0A3M3BR96\_PSESX/1-1142

MHTAGELPVAAQRISRMTDKNGTHQQRRAALFPKTPATATSLCPFRGPNVAIVPVRYALDRSRYDVNPTQ  
LK  
PLPKDGHWASLPKLKTRSYTLRQLYDGYVYVFDETAGTLHEYAASASDGHLSRIVWTDHIGNDQRSGAG  
EG  
QPFLVYPRDHRLHIAFSPLQWTWRMCEHMRSHAPSRALWMKALDLASYCLTMAEPDTLPLDRIAEAVADI  
DK  
DCVVEDGRFADSAIPSVRPPSEGAEPYPLWAPLGADVFWQGSVYDQDSSLVIALNDPLAVFNDLGMQLAA  
DQ  
AAFREWQSAHEHKKIQAQTVATLCGAESEAEKLPASVRGDALRTHQYLSEVEAYFEQCILEEAQISSSNV  
PG  
DFLLL PDMFKSLDMRKS IETRYGSAPTDEGAQAWKDRHKWRREVDLSSARQYLLQHLPTGDKRLQQVRDT  
QS  
DFQHWAAHIGTEPLKLFIDTTHPKTLLYLQTIMLNLQIIYAQDSAANAWLAEQEANTSSLFGTLRYGFSP  
AL  
KHALHQEADALLNGLGDVTNLATRIGELNGVLNHQGFADKPWMKALKQPVDTFKALGELASGAGKARFE  
SV  
LLAWVPIDSRMALGKQONIVALLRLLIGQILLDSTARVAINEQTVTKLKQWVSEWQVLNKQISELVRSW  
QY  
PNAYNTRQSTARKLQAHKHKLRVHEL SIPALLDFQNEYAKLLQDEIRQYFQSGKTLAKDWLARARGWTD  
RL  
GGTAGSITWGVMLNLINTAFLYRDLTRDGFSTKDIGKVTYGLGYSFNLLMAVFVEAPWSIIRDATPAL  
ID  
GKNVAILDRSSAYWKAKGNAAWGDAIRGFRVSMVAMGGFGLAAVTLELFDVTDDFHAAKTSEEEYGLRIK  
WS  
SVLMMGLGSAAQLFAGMFPASAF AIAMNPWF SVALFATGFIYLLATMALNYFKQDSVGVWLRKCYWSIT  
QD  
YRYAETAEGKHEEVRALMEIQ LSPQIHVKSTVHYESRYLGKGDYYSVAVQNGAGVQVRLPNLLRGQTVHF  
NV  
ISSKRPWGLTVEKIDQPIYEAF LDRGQFRKIEQFGMLTNKPAGKASEDFTYPRMPPENEDLIWETWVPL  
DK  
DATYLELQLWYPANFLNPGGDDRSYLFQMELGIRGDTAIDGVAAVELEVKATSRIGALTLEV-----  
--  
-----  
--  
-----  
--  
-----  
--  
-----  
--  
-----

>A0A326T309\_9PSED/1-1126

MTDKSGTHTQRRRAATFAKTPATATSLCPFRGPDVAIVPVRYALDRSRYDTAPEKLPKPLLEGSRWAVMPKL  
KT  
RSYTLRQLYDGYVYVYDETAETLHEYAVSAATGNLSRIVWTDALGSDQRSGGSDAKPFLLYPRNLLRI  
AF  
SAQQWSWRICEHLRSNPASRDSWMKALDLKRYCITMAEPDTLPLNCIAEAVADIDNEYVVDLDRFADSAI  
PT  
SKASSEETQPLFSPIGADVFWQGSVEDQDSSLLIALDDPLAIFNDLGMQLAADQAAYRNWQAGHEHKKIQI  
AQ  
TVTTLCGAESDPEKLPASVRGNSAL THQYLGELEAYFEQCILEEAQISSSNVPGDFLLMPDMFKSLDMRK

SI  
EMRYGSAPSDQALQAWKDRHKWRREVDLSGARAYLQQHLPTGDTLLQQVRDTQSDFRQWSTHLGTEPLKL  
FV  
DTSHPESELLYLQTVMLNLQIIYAQDNAASAWLAEQEANDSSLFGTLRYGFSPALKHALHQEANALLNGLG  
DI  
TNLATRIGELNGTLNHQGFADKPWMKALKQPVQDTFKALGQLASSAGKATFESILLAWPIDSRMAVGKQ  
QN  
IVALIRTLIGQILLDSKARIAIDHNMLAKLKTWISEWQVLNKQISDTRRSWLYPTAYNPRKSIASHLRA  
LE  
EKLRLHELSPALLDFQNNQYARQLQDEIRLHFQSGKAITKEWLSARRWLDGLGGIAGSITWGVIMLNF  
IN  
TAFTYRDLTRDGDFAKDLGKVTYGLGYSFNLLMAVFVEAPWAVIRDATPVLIDGKNVGILDRSAGYWRA  
KG  
NLVWGDPAIRGFRVSMVAMGAFGVAAVLEVLDIQDDLSRVNTSEEIIAMQLKFASVLMGAGSAIQLIAG  
IF  
PTTPLTAVAMSPWFSITLLLLIGTVYLFATTALNYFKQDSVGVWLRCCWSRSIEYRYSTDAGGQHAEKLD  
LL  
TIQLSPQVHVKITTRLESRYLGKGDYYSTAVQDGAGVQLLPQSAVRAQSVHFNISSKRPWGVLPVEKID  
SP  
INESFLNRGQFRQAGQFGTLGNKAARNAHEDFTFPLMPHESEDLIWETWIPLEAEATYLELQIWYPDSL  
IKP  
DQQDIGYLYQLKLNREGDTKVDGLITAELEVKALNRSTALTLEVAE-----  
--  
-----  
--  
-----  
--  
-----  
--  
-----  
--  
-----  
--  
-----

>F3IRJ1\_PSEAV/1-955

MTDKNGTHQORRAALFPKTPATATSLCPFRGNVAIVPVRYALDRSRYDVNPTQLKPLPKDGHWASLPKL  
KT  
RSYTLRQLYDGYVYVFDDETAGTLHEYAASASDGHLRSRIVWTDHIGNDQSRGAGEGQPFVLYPRDHRLHI  
AF  
SPLQWTWRMCEHMRSRALSALWMLKALDLASYCLTMAEPDTLPLDRIAEAVADIDKDCVVEDGRFADSAI  
PS  
VRPPSEGAEPYPLWAPLGADVFWQGSVYDQDSSLVIALNDPLAVFNDLGMQLAADQAAFREWQSAHEHKI  
QI  
AQTVALTCGAESEAEKLPASVRGDALRTHQYLSEVEAYFEQCILEEAQISSSNVPGDFLLLPMFKSLDM  
RK  
SIETRYGSAPTDEGAQAWKDRHKWRREVDLSSARQYLLQHLPTGDKRLQQVRDTQSDFFQHWAAHIGTEPL  
KL  
FIDTTHPKTLLYLQTIMLNLQIIYAQDSAANAWLAEQEANTSSLFGTLRYGFSPALKHALHQEADALLNG  
LG  
DVTNLATRIGELNGVNLNHQGFADKPWMKALKQPVQDTFKALGELASGAGKARFESVLLAWPIDSRMALG  
KQ  
QNIWALLRLLIGQILLDSTARVAINEQTVTKLKQWVSEWQVLNKQISELVRSWQYPNAYNTRQSTARKL  
QA  
HKHKLRVHELSPALLDFQNNQYAKLLQDEIRQYFQSGKTLAKDWLARARGWTDRLGGTAGSITWGVVML

NL  
INTAFLYRDLTRDGFSTKDIGKVTYGLGYSFNLLMAVFVEAPWSIIRDATPALIDGKNVAILDRSSAYW  
KA  
KGNAAWGDAIRGFRVSMVAMGGFGLAAVTLELFDVTDDFHAAKTSEEEYGLRIKWSSVLMGLGSAQLF  
AG  
MFPASAFAIAMNPWFVALFATGFIYLLATMALNYFKQDSVGVWLRKCYWSITQDYRYAETAEGKHEEV  
RA  
LMEIQLSPQIHVKSTVHYE-----  
--  
-----  
--  
-----  
--  
-----  
--  
-----  
--  
-----  
--  
-----  
--  
-----  
--  
-----  
--  
-----

>A0A3M3EE48\_PSEAV/1-1132  
MTDKHGHQRRALFPKTPATATSLCPFRGANVAIVPVRYALDRSRYDAAPEKLKPLPKQRKWALMPTL  
KT  
RSYTLRQLYDGYLYVFDETAGTLHEYVASANNHLSRIVWTDQAIGSDQRSGASDGKPFLLYPRRNTLHI  
AF  
SPQQWTWRVCEHMRSSAPSRAALWMLKALDLASYCITMAEPDTLPLNRIAEAVADIDKGHVTDDGRFADSAI  
PT  
ARPLSEDAETNPLWAPLGADVFWQGSVDDQDSSLLIALDDPLAVFNDLGMQLAADQAAFRDWQARHEHKI  
QI  
AQTVSGLCGAESDPQKLPAVSRGNAARTHQYLSEVEAYFEQCILEEAQISSSNVPGDFLLLPDMFKSLDM  
RK  
SIEARYGVPTEEAQAQAWKDRHKWRREVDLASARQYLQHLPSGDALLQVVRTQSDFLWATHIGIDPL  
KL  
FIDTTRPTQLLYLQTIMLNLQIIYAQDSATSTWLAEQEANATTLYGTVRYGFSPALKQALHQEADALLNG  
LG  
DVTNLATRIGELNGALNHQGFADKPWMKALKQPVQGTGFKALGELASGAGKTTLESILLAWVPIDSRMAG  
KQ  
QNIVALLRLLIGQILLDSKARIAVDQVFTKQKQWIREWQVLNKQISDTRRRWLYPNAYNTRQSTARNL  
HA  
HKQKLRVHELIPSLDFQNEAYAKLLQDEIRQYFQSGKTLAKDWLAQAKRWTDRLLGGTAGSITWGVIML  
NF  
INTALTYRDLTRDGFSAKDIGKVTYGLGYSFNLLMAVFVEAPWSVIRDATPELIDGKNVAILDRSSAYW  
KA  
KGNVTWGDAIRGFRVSMVAMGGFGIVAVVLELFDITDDFHEAKTSGEEYGIGIKGFSVLMGLGSAQQLL  
AG  
IFPAGVFTIIAMNPWFVALMATGFIYLIATMALNYFKQDSVGVWLRKCCWSRTLAYRYAETAEGEQEEV  
RA  
LMEIQLSPQVHAKSTVHYEDRYLGKGDYYSVAVQNGAGVQVRLPNLLRGQSVHFNIIVSSKRPWGVLPVEK  
MD  
DPLHEAFLDRGQFRKAEQFGTLTNKQAGKTSDFTYPLMPENEDLIWETWVPLDKDATYLELQIWYPNN

LI  
NPSEDDRGYLFQMELGTWGDTAIDGLAAVELEVQASSRIGTLTLEVAESTPL-----

--

-----

--

-----

--

-----

--

-----

>A0A0P9R5G7\_PSESX/1-966  
MTDKHGTHQRRRAALFPKTPATATSLCPFRGPNVAIVPVRYALDRSRYDAAPEQLKPLPKQGKWTLMPTL  
KT  
RSYTLRQLYDGYLYVFDETAGTLHEYVASANNHLSRIVWTDQAIGRDQRSGASDGKPFLLYPRRHTLHI  
AF  
SPQQWTWRVCEHMRSSAPSRALWMKALDLASYCITMAEPDTLPLNRIAEAVADIDKGYVTDDGRFADSAI  
PT  
ARPLSEDAETNPLWAPLGADVFWQGSVDDQDSSLLIALDDPLAVFNDLGMQLAADQAAFRDWQAEHEHKI  
QI  
AQTVSGLCGAESDPQKLPASVRGNAARTHQYLSEVEAYFEQCILEEAQISSSNVPGDFLLLPDMFKSLDM  
RK  
SIEARYGSAPTEEAAQTWKDRHKWRREVDLGSARQYLQHLPSGDALLQQVRDTQRDFQLWATHIGTDPL  
KL  
FIDTTRPTQLLYLQTIMLNLQIIYAQDSAATTWLAEQEANATTLFGSLRYGFSPALKQALHQEADALLNG  
LG  
DVTNLATRIGELNGALNHQGFADKPWMKALKQPVQGTFKALGELASGAGKTTLESILLAWVPIDSRMAG  
KQ  
QNIvallRtLLIGQILLDStARiAvDQqVfTKLkQwTReWqVlNkQISDTRRRwLYPNayNTRQStARnL  
HA  
HKQKLRVHELsIPALLDFQnNEYAKLLQDEIRQYfQSGKTLAKDWLAQAKRwTDRLGGTAGSITwGVIML  
NF  
INTALTYRDLTRDGDfSAKDIGKvTYGLGYSFNLLMAVfVEAPwSVIRDATPVLIDGKNVGVLDRSSAYW  
KA  
KGNVTWGDaiRGFRVSMVAMGGfGIAAVVLElFDITDDfHEAKTSgEEYGIGIKGfSVLVMGLGSAAQLL  
AG  
IFPAGVfTIIAMNPwFSVALMATGfIYLIATMALNYFKQDSVgWwLRKCCwSRTLAYRYAETAEGEQEEV  
RA  
LMEVQLSPQVhAKSTVHYEDVTLAKAITTA-----

--

-----

--

-----

--

-----

--

-----

--

-----

--

-----

>A0A3M3ZFD7\_PSEYM/1-1132

MTDKNGTHQRRRAALFPKTPATATSLCPFRGNVAIVPVRYALDRSRYDVNPTQLKPLPKDGHWASLPKL  
KT  
RSYTLRQLYDGYVYVFDETAGTLHEYAASASDGHLRSRIVWTDHIGNDQRSGAGEGQPFLLYPREHRLHI  
AF  
SPMQWTWRMCEHMRSHAPSRALWMKALDLASYCLTMAEPDTLPLDRIAEAVADIDKDCVVEDGRFADSAI  
PC  
ARPPSEGAEPDPLWAPLGADVFWQGSVYDQDSSLVIALDDPLAVFNDLGMQLAADQAAFREWQSAHEHKI  
QI  
AQT VATLCGAESEAEKLPASVRGDALRTHQYLSEVEAYFEQCILEEAQISSSNVPGDFLLLPDMFKSLDM  
RK  
SIETRYGSAPTDESAQAWKDRHKWRREVDLSSARQYLLQHLPTGDKRLQQVRDTQSDQFHWAAHIGTEPL  
KL  
FIDTTHPKTLLYLQTIMLNLQIIYAQDSAANAWLAEQEANSSSLFGTLRYGFSPALKHALHQEADALLNG  
LG  
DVTNLATRIGELNGVLNHQGFADKPWMKALKQPVQDTFKALGELASGAGKARFESVLLAWVPIDSRMAG  
KQ  
QNIVALLRLLIGQILLDSTARVAINEQTVTKLKQWVSEWQVLNKQISELVRSWQYPNAYNTRQSTARKL  
QA  
HKHKLRVHEL SIPALLDFQNNYAKLLQDEIRQYFQSGKTLAKDWLARARGWTDRLGGTAGSITWGVVML  
NL  
INTAFLYRDLTRDGFSTKDIGKVTYGLGYSFNLLMAVFVEAPWSIIRDATPALIDGKNVAILDRSSAYW  
KA  
KGNAAWGDAIRGFRVSMVAMGGFGLAAVTLELFDVTDDFHAAKTSEEEYGLRIKWSSVLMGLGSAQLF  
AG  
MFPASAFAIAMNPWF SVALFATGFIYLLATMALNYFKQDSVGWWRKCYWSITQDYRYAETAEGKHEEV  
RA  
LMEIQLSPQIHVKSTVHYESRYLGKGDYYSVAVQNGAGVQVRLPNLLRGQTVHFNVISSKRPWGLTVEK  
ID  
QPIYEAFDRGQFRKIEQFGMLTNKPAGKASEDFTYPRMPENEDLIWETWVPLDKDATYLELQLWYPAN  
FL  
NPGGDDRSYLFQMELGIRGDTAIDGVAAVELEVKATSRIGALTLEVAEGTPV-----  
--  
-----  
--  
-----  
--  
-----  
--  
-----  
--  
-----

>A0A3M5HT83\_PSEAV/1-1158

MVGTHLGMFYFCIQRAKLPVSAQRVSRMTDKHGTHQRRRAALFPKTPATATSLCPFRGANVAIVPVRYALD  
RS  
RYDAAPEKLPKPKQRKWMPTLKTRSYTLRQLYDGYLYVFDETAGTLHEYVASANNGHLRSRIVWTDQA  
IG  
SDQRSGASDGKPFLLYPRRNTLHIAFSPQQTWRVCEHMRSSAPSRALWMKALDLASYCITMAEPDTLPL  
NR  
IAEAVADIDKGHVTDGGRFADSAIPTARPLSEDAETNPLWAPLGADVFWQGSVDDQDSSLIALDDPLAV  
FN  
DLGMQLAADQAAFRDWQARHEHKIQIAQTVSGLCGAESDPQKLPASVRGNAARTHQYLSEVEAYFEQCIL

EE  
AQISSSNVPGDFLLL PDMFKSLDMRKSIEARYGSPTEEEAAQAWKDRHKWRREVDLASARQYLQQHLP  
SG  
DA  
LLQQVRDTQSD FQLWATHIGIDPLKLFIDTTRPTQLLYLQTIMLNLQIIYAQDSATSTWLAEQ  
EANATTL  
YG  
TVRYGFSPALKQALHQEADALLNGLGDVTNLATRIGELNGALNHQGFADKPWMKALKQPVQGT  
FKALGEL  
AS  
GAGKTTLESILLAWVPIDSRMALKGQONIVALLRLLIGQILLDSKARIAVDQVFTKQWIREWQ  
VLN  
KQ  
ISDTRRRWLYPNAYNTRQSTARNLHAHKQKLRVHEL SIPSLLDFQNNYAKLLQDEIRQYFQSG  
KTLAKD  
WL  
AQAKRWTDRLLGGTAGSITWGVIMLNFINTALTYRDLTRDGD FSAKDIGKVTYGLGYSFNLLMA  
VFVEAPW  
SV  
IRDATPELIDGKNVAILDRSSAYWKAKGNVTWGDAIRGFRVSMVAMGGFGIVAVVLELFDITD  
DFHEAKT  
SG  
EEYGIGIKGFSVLVMGLGSAAQLLAGIFPAGVFTIIAMNPWF SVALMATGFIYLIATMALNYFK  
QDSVWG  
WL  
RKCCWSRTLAYRYAETAEGEQEEVRALMEIQLSPQVHAKSTVHYEDRYLGKGDYYSVAVQNG  
AGVQVRLP  
NL  
LRGQSVHFNI VSSKRPWGVLPVEKMDDPLHEAFLDRGQFRKAEQFGTLTNKQAGKTS  
EDFTYPLMP  
PENE  
DL  
IWETWVPLDKDATYLELQIWYPNNLINPSEDDRGYLFQME LGTWGDTAIDGLAAVELEVQAS  
SRIGTLTL  
EV  
AESIPL-----  
--  
-----  
--  
-----  
--  
-----  
--  
-----

>A0A3M5FDR3\_PSESS/1-992  
MVG MHLGMYFCIQRAKLPVSAQRISRMTDKHGTHQORRAALFPKTPATATSLCPFRGPNVAIV  
PVRYALD  
RS  
RYDAAPEQLKPLPKQGKWTLMPTLKTRSYTLRQLYDGYLYVFD ETAGTLHEYVASANNGHLSR  
IVWTD  
AQ  
IG  
RDQRSGASDGKPFLLYPRRHTLHIAFSPQQWTRVCEHMRSSAPS RALWMKALDLASYCITMA  
EPDTLPL  
NR  
IAEAVADIDKGYVTDDGRFADSAIPTARPLSEDAETNPLWAPLGADVFWQGSVDDQDSSLLI  
ALDDPLAV  
FN  
DLGMQLAADQAAFRDWQAEHEHKIQIAQTVSGLCGAESDPQKLPASVRGNAARTHQYLSEVE  
AYFEQCIL  
EE  
AQISSSNVPGDFLLL PDMFKSLDMRKSIEARYGSAPTEEEAAQTWKDRHKWRREVDLGSAR  
QYLQQHLP  
SG  
DA  
LLQQVRDTQRDFQLWATHIGTDPLKLFIDTTRPTQLLYLQTIMLNLQIIYAQDSAATTWLAE  
QEANATTL  
FG  
SLRYGFSPALKQALHQEADALLNGLGDVTNLATRIGELNGALNHQGFADKPWMKALKQPVQGT  
FKALGEL  
AS  
GAGKTTLESILLAWVPIDSRMALKGQONIVALLRLLIGQILLDSTARIAVDQVFTKQWIREWQ  
VLN  
KQ  
ISDTRRRWLYPNAYNTRQSTARNLHAHKQKLRVHEL SIPALLDFQNNYAKLLQDEIRQYFQSG  
KTLAKD

WL  
AQAKRWTDRLGGTAGSITWGVIMLNFINTALTYRDLTRDGDGFSAKDIGKVTYGLGYSFNLLMAVFVEAPW  
SV  
IRDATPVLIDGKNVGVLDRSSAYWKAKGNVTWGDAIRGFRVSMVAMGGFGIAAVVLELFDITDDFHEAKT  
SG  
EEYGIGIKGFSVLVMGLGSAAQLLAGIFPAGVFTIIAMNPWFVALMATGFIYLIATMALNYFKQDSVWG  
WL  
RKCCWSRTLAYRYAETAEGEQEEVRALMEVQLSPQVHAKSTVHYEDVTLAKAITTA-----  
--  
-----  
--  
-----  
--  
-----  
--  
-----  
--  
-----  
--  
-----  
--  
-----  
--  
-----  
--  
-----

>A0A3M4C5Y3\_9PSED/1-1147  
MMNTVRKPKVPRMLHMTDKYGTGTHQORRAALFPKTPATATSLCPFRGNIAIVPVRYALDRSRYDVPDPRQL  
KP  
LPKDGHWHLPTLKTRSYTLRQLYDGYVYVFDASTLHEYAASATDGHLSRIVWTDTHIGNDQRNGAGE  
GQ  
PFLLYPREHRLHIAFSPMQWTWRMCEHMRSRALSALWMLKALDLASYCLTMAEPDTLPLDRIAEAVADID  
KD  
RVVDDGRFADSAIPTVRPPSEGAEPDPLWAPLGADVFWQGSVYDQDSSLVIALDDPLAVFNDLGMQLAAD  
QA  
AFREWQSAHEHKIQIAQTVATLCGAESEAEKLPASVRGDALRTHQYLSEVEAYFEQCILEEAQISSSNVP  
GD  
FLLLPDMFKSLDMRKSIIETRYGSAPTDEGAQAWKDRHKWRREVDLSSARQYLLQHLPTGDKRLQQRDTQ  
SD  
FQLWATHIGTEPLKLFIDATRPTQLLYLQTIILNLQIIYAQDSAANAWLAEQEANTSSLFGTLRYGFSPA  
LK  
HALHQEADALLNGLGDVTNLATRIGELNGLVNHQGFADKPWMKALKQPVQDTFKALGELASGAGKATFES  
VL  
LAWVPIDSRMALGKQQNIVALLRLLIGQILLGSTARVAINEQAVTKLKQWVREWRVLNKQISELVRSWQ  
YP  
NAYNTRQSTARNLQAHKHKLRVHELIPALLDFQNSEYAKLLQDEIRQYFQSGKTLAKDWLARAAGWTDR  
LG  
GTAGSITWGVMLNLINTAFLYRDLTRDGDGFSKDIGKVTYGLGYSFNLLMAVFVEAPWAIISTAKPLVI  
GG  
YDVGILDKSAAYWKARGNAVWGDAIRGFRGSMVAMGGFGLAAVTLELFDVADDFYAAKTPEEKNVIVK  
IS  
VFAMGVGSTFQLMSGLSPASTFTIVAMSPWFVALLVIGSIYLFITMALNYLKQDSVGGWLRKCCWSTTL  
DY  
RYAETAEGEHEEVRALMEIQLSPQVHVKSTVHYENRYLGKGDHYSVAVQNGAGVQVRLPNRVRGQSVHFN  
IV  
SSKRPWGVLPVEKIDDPLHQAFDRGQFRKVEQFGMLTNKPAGKASEDFTYPLMPENEDLIWETWVPLD

KD

AAYLELQIWYPASLLNTGEDDRSYLFQMELGPRGNTAIDGLAAVELEVKASN MAGALTLEVAEGTPL----

--

--

--

--

--

--

>A0A3M3XZ66\_9PSED/1-1128

MTDKNGTHQQRRAALFPKTPATATSLCPFRGNIAIVPVRYALDRSRYDVDPAQLKPLPKDGQWARLPTL

KT

RSYTLRQLYDGYVYVFEDETAGTLHEYAASASDGHL SRIVWTDTHIGNDQRNGADEGQPFLLYPRDNRLHI

AF

SPMQWTWRVCEHMRSRALSALWMLALASYCLTMAEPDTLPLDRIAEAVADIDKDRVLEDGRFADSAI

PT

ACPLSEDESHPWTPGLGVDVFWQGSVYDQDSSLVIALDDPLAVFNDLGMQLAADQAAFREWQSAHEHKI

QI

AQTVATLCGAESEAEKLPASVRRDALRTHQYLSEVEAYFEQCILEEAQISSSNVPGDFLLLPDVFKSPDM

RR

AIQARYGSAPSDEGAQAWKDRHKWRREVDLSSARQYLLQHLPTGDKRLQQVRDTQSDFQHWAHIGTDPL

KL

FIDTTRPTQLLYLQTIMLNLQIIYAQDSAANAWLAEQEANTSSLFGTLRYGFSPALKHALHQEADALLNG

LG

DVTNLATRIGELNGVLNHQGFADKPWTKALKQPVDTFKALGELASGAGKARFESVLLAWVPIDSRMAG

KQ

QNI VALLR TLLIGQILLDSTARVAINEQTVTKLKQWVREWQVLNKQISDIRRRWLYPNAYNTRQSTARNL

QT

HKHKL RVHEL SIPALLDFQNEYAKLLQDEIRQYFQSGKTQAKDWLARA KGWTDRLGGTAGSITWGVVML

NL

INTAFLYRDLTRDGFSTKDIGKVTYGLGYSFNLLMAVFVEAPWRVIRDATPVLIDGKNVAILDRSSAYW

KA

KGNTAWSDAIRGFRASMVAMGGFGLAAVTLEIFDIHDDWRKSKTSAEKNVIVTKGLATAAMGLGSLAQLL

AG

LSPASRLTFLVMSPWFSLALLTAGAIYLFATMALNYFKQDSVGWWRKSCWSWTSEHRHAETVRGGNNEM

YE

FLEIQLSPQIYVKSTVHYENRYLGKGDYISVAVQNGVSVQVRLPSALRGQSVHFNVISSKRPWGVLPVEK

ID

RPVHEDFLDRGQFRKLEQFGTLANKPAGKASDDFTYPLMPENEDVIWETWMALDQDASYLELQIWYPQH

LI

TSSQNDTGYWFQLELSTKGSIAFDGLTATELEVKSHNRTGFLTLEIAE-----

--

--

--

--

--

--

--

>A0A3M5LD29\_PSESX/1-1132

MTDKSGTHSQRRRAATFAKIPATATSLCPFRKPEVAIVPVRYALDRSRYDAAPEKLPKLLKGSRWAVMPKL  
KT  
RSYTLRQLYDGYVYVYDETAGTFHEYVSSAADGHLRSRIIWADAQIGSNRRSGADDGKPFLLYPRNNRLHI  
AF  
SAQQWTWRICEHLRSNPASRASWMKALDLKRYCMTMAEPDTLPLNRIAEAVADIDKEHVDDDRFADSAI  
PA  
ARPPSDSDEGKALFSPIGADVFWQGSVEDKNSSLLIALDDPLAIFNDLGMQLAADQAAYRNWQAEHEHKI  
QI  
AQTVTALCGAESEPEKLPASVRGNAALTHQYLSDVEAYFEQCIFEQEQIGNNTAPGGVLLLPDIFKSPERM  
RR  
SLEMYGSAAPSDEALQAWKDRHKWRREVDLSGARAYLQQHLPTGDTLLQQVRDTQSDFRQWSTHLGTEPL  
KL  
FVDTTHPESLLYLQTVMLNLQIIYAQDSAASAWLAEQEANDSSLFGTLRYGFSPALKHALHQEANALLNG  
LG  
DITNLATRIGELNGTLNHQGFADKPWMKALKQPVQDTFKALGQLASSAGKATFESILLAWVPIDSRMAVG  
KQ  
QNIVALIRTLIGQILLDSKARIAIDHNMLAKLKNWISEWRVLNKQISDTRRSWLYPTAYNPRKSIASHL  
RA  
LEQKLRLHELSPALLDFQNNQYARQLQDEIRLHFQSGKAITKEWLSTARRWFDGLGGIAGSITWGVIML  
NL  
INTAFTYRDLTQDGNFSTKDIGKVMYGLGYSFNLLMAVFVEAPWAVIRDATPVLIDGKNVGIIDRSAGYW  
RA  
KGNAAWSGAIRGFKVSMVAMGGFGLAAVTLELFDVTNDFYAAKTSEEKNAIIVKGISIFAMGVGSTFQLM  
AG  
LSPASTFTIVAMSPWFVSVALLVIGSIYLFITMALSFKQDSVGVWLRKCCWSRTLDRYPETAKGESEEV  
RA  
LMEIQLSPQIHVKSTVHYENRYLGKGDYYSVAVQNGAGVQVRLPKLVRGESVHFNMVSSKRPWGVLPVEK  
ID  
DPLHQAFDRGQFRKAEQFGTLTNNPAGKASEDFTYPLMPENEDLIWETWVPLDKDATYLELQIWYPAN  
LI  
NPGEDDRSYLFQMKLGTRGDTAIDGLAAVELEVKASSRIGTLTLEVAEGTPV-----  
--  
-----  
--  
-----  
--  
-----  
--  
-----  
--  
-----

>Q885D1\_PSESM/1-1142

MPVAAQRISRMTDKNGTHRQRRALFPKTPATATSLCPRGNIAIVPVRYALDRSRYDADPTQLKPLPK  
DG  
QWARLPTLKTRSYTLRQLYDGYVYVYVYDETAGTLHEYAASASDGHLRSRIVWSDAHIGNDQRTGADEGQPFL  
LY  
PREHRLHIAFSPMQWTWRMCEHMRSHAPSRALWMKALDLASYCLTMAEPDTLPLDRIAEAVADIDKDCVV  
ED  
GRFADSAIPSVRPPSEGAEPDPLWAPLGADVFWQGSVYDQDSSLVIALDDPLAVFNDLGMQLAADQAAFR  
EW  
QSAHEHKIQIAQTVATLCGAESEAEKLPASVRGDALRTHQYLSEVEAYFEQCILEEAQISSSNVPGDFLL

LP  
DMFKSLDMRKS IETRYGSAPTDEGAQAWKDRHKWRREVDLSSARQYLLQHLPTGDKRLQQVRDTQSDFQH  
WA  
AHIGTEPLKLFIDTTHPKTLLYLQTIMLNLQIIYAQDSAANAWLAEQEANTSSLFGTLRYGFSPALKHAL  
HQ  
EADALLNGLGDVTNLATRIGELNGLVNHGRGFADKPWMKALKQPVQDTFKALGELASGAGKARFESVLLAW  
VP  
IDSRMALGKQQNIVALLRLLIGQILLDSTARVAINEQTVTKLKQWVSEWQVLNKQISELVRSWQYPNAY  
NT  
RQSTARKLQAHKHKL RVHEL SIPALLDFQNEYAKLLQDEIRQYFQSGKTLAKDWLARARGWTDRLGGTA  
GS  
ITSGVVMLNLINTAFLYRDLTRDGFSTKDIGKVTYGLGYSFNLLMAVFVEAPWAIIRTA KPLVIGGYDV  
GI  
LDKSAAYWKARGNAVWGDAIRGFRGSMVAMGGFGLAAVTLELFDVIDDFFAAKTSEETYGIGIKGFSVLV  
MG  
LGAAAQLMAGISPAGVFTI IAMSPWF SVALLATGFIYLLATMALNYFKQDSVGVWLRKCCWSSTLDYRYA  
ET  
TDGEHEEVRALMEIQLSPQVHVKSTVNYENRYLGKGDYYSVAVQNGAGVQVRLPNVLRGQTVHFNVISSK  
RP  
LGVLTVEKIDQPIYEAFDRGQFRNTEQFGTLTNKPAGKASEDFTYPRMPPENEDLIWETWVPLDKDATY  
LE  
LQIWYPANFLNPGGDDRSYLFQMELGIRGDTAIDGLAAVELEV KASSRIGALTLEVAEGTPV-----  
--  
-----  
--  
-----  
--  
-----  
--  
-----  
--  
-----

>A0A2S4HXH3\_PSESY/1-1130  
MTDKSGTHTQRR AATFAKIPATATSLC PFRKPEVAIVPVRYALDRSRYDAAPEKLP LLKGSRWAVMPKL  
KT  
RSYTLRQLYDGYVYVYDETAETLHEYAVSAATGNLSRIVWTD AQLGSDQRSGGSDAKPFLLYPRNNLLRI  
AF  
SAQQWTWRTCEHLRSNPASRDSWMKALDLKRYCMTMAEPDTLPLNR IAEAVADIDKEHVDDDRFADSAV  
PT  
SESSSEETQPLFSPIGADVFWQGSVEDQDSSLLIALDDPLAIFNDLGMQLAADQAAYCNWQAEHEHKIQI  
AQ  
TVTALCGAESEPEKLPASVRDNAALTHQYMSDVEAYFEQCIFEQE QIGNNTAPGGVLLLLPDIFKSPERM  
SL  
EMRYGSAPSDEALQAWKDRQKWRREVDLSGARAYLQHLPTGDTLLQKV RDTQSDFRQWSAHLGTEPLKL  
FV  
DTTHPQSLLYLQTLMLNLQIIYAQDNAASAWLAEQETNDSSLFGTL RYGFSPALKHALHQEANALLNGLG  
DV  
TNLATRIGELNGTLNHQGFADKPWMKALKHPVQDTFKALGQLASGAGKATFESILLAWPIDSR LAVGKQ  
QN  
IVALIRTLIGQILLDSNARIAIDQKMFTKLKSWISEWRVLNKQISDIRR SWLYPTAYNPRKSIASHLRA  
LE  
QKLRLHEL SMPALLDYQNNQYAKQLQDEIRLHFQSGKAITKEWLSTARRWLDGLGGIAGSITWGVIMLNF

IN  
TAFTYRDLTRDGNFSAKDIGKVTYGLGYSFNLLMAVFVEAPWAVIRDAKPLSIGGYNIGILDKSAAYWKA  
RG  
NAVWGDAIRGFRVSMVAMGGFGLAAVTLEIFDVADDFYAAKTPEEKNVIVKGISVFTMGVGFSTFQLMGG  
LS  
PASAFATVAMSSWFSVALLIIGSIYLFMTMLNYFKQDSVGVWLRKCCWSRTLDRYRYAETAQGEHEEVRA  
LM  
EIKLSPQVYVKSTVYYENRYLGKGDHYSVAVQNGAGVQVHLPNLIRGQSVHFNIIVSSKRPWGVLPVEKID  
DP  
LHQTFLDRGQFRKAEQFGKLTNTPPGKASEDFTYPLMPPDNEDLIWETWVPLDKDATYLELQIWYPASLL  
DP  
GEEDRSYLFQMQLSPKGDTAIDGLAAVELEVKTSNRAGTLTLEVAEGTPL-----  
--  
-----  
--  
-----  
--  
-----  
--  
-----  
--  
-----

>W0MV53\_PSESX/1-1127

MTDKNGTRQQRRACFDKTPATATSLCPFKGPSIAIVPVRYALDRSRYDADPKQLKPLPKDGKWASLPTL  
KT  
RSYTLRQLYDGYVYVDFETAGTLHEYAVSAADGHLISKIVWSDAQVGSQDRSGGTDGKPFLLYPRSNRLHI  
AF  
SPLQWTWRICEHMRSNPPSRALWMKALDLPRYCITMAEPDTLPLNHIAEAVADVCKGNVIDDGRFADSAI  
PT  
ARSPSGDEATSLFSPVGADVFWLGSVDDKSSLLIALDDPLAVFNDLGMQLAADQAACRNWQAEHEHKIQ  
IA  
QTVTTLCGAESEPEKLPASVRGDAAGTHQYLSVVEAWFDQCIIEEAQINSSSVPGDFLVLPMFKSLDMR  
KS  
IEARYGSAPSEQDAQVWVKDRHKWRREVDLTGARQYLLHHL PAGDTLLQVRDTQSDFRQWSTYLGTEPLK  
LF  
IDTTHPNTLLYLQMILLNLQIIYAQDNAASAWLAEQEANTSSLFGTLRYGFSPALKDALHQEANALLNGL  
GD  
VTNLATRIGELNGALNHQGFADKPWMKALKQPVDTFKALGELASGAGKATLESILLAWVPIDSRHAIGK  
KQ  
NIVALIRTLIGQVLLDSPTRIAINPQVFTRLKQWIREWQVLNKQISDTRRSWLYPTAYNTRKSTANHLN  
AL  
RERLRLHELSPALLDFQNKYAKQLQDEIRQYFQTGKAITKDWLAHAKRWIDKLGGIAGSITWGVIMVN  
FI  
NTALTYRDLTKDGFSLKDIGKVTYGLGYSFNLLMAVFVEAPWRVIKDATPVLIDGRNVGILDRSSGYWK  
AR  
GNLEWGEAISGFRVSMVAMGAFGIAAAMLELIDIYDDLTKTKTTEEATATRIKFGSVGLMAAGSTFQVAA  
GF  
LPASSYTLVAMSPWFSVAILLTGVIYLLTSMALNYFKQDSVGVWLRQCSWSKSIYRYPADAGGQLEEKL  
AL  
LTIQLSPQVHVKSTTRDEDHYFGRDTPYSAPVQYAGVQILLPSAVRGQSVHFNIISSERPLGVLPVAKI  
DD  
PILDPFLDRGQFKKVDQFKNLVNKPARGAQEDFTFPLMPPEGEDIVWETWVPLGKDATYLELQIWYPDSL

IE  
PGQQDVGYL FQLELNSKGD TAADGLAHTELEIKASNRAS TLALEIAE-----  
--  
-----  
--  
-----  
--  
-----  
--  
-----  
--

>A0A0P9UUL7\_PSEA0/1-1132  
MTDKHGTHQRRRAALFSKTPATATSLCPFRGPNVAIVPVRYALDRSRYDAAPEQLKPLPKQGKWALMPTL  
KT  
RSYTLRQLYDGYVYVFEDETAGTLHEYVASANNHLSRIVWTD AQIGSDQRSGASDGKPFLLYPRRHQLHI  
AF  
APQQWTRICEHMRSSAPSRALWMKALDLASYCITMAEPDTLPLNRIAEAVADIDKGYVTDDGRFADSAI  
PT  
ARPLSEDEKNPLWAPLGADVLWQGSVDNQDSSLLIALDDPLAVFNDLGMQLAADQAAFRDWQAEHEHKI  
QI  
AQTVSGLCGAESDPLKLPASVRGNAARTHQYLSEVEAYFERCILEEAQISSSNVPGDFLLLPDMFKSLDM  
RK  
SIEARYGSVPTEKAAQAWKDRHKWRREVDLASARQYLQQHLPSGDALLQQVRDTQSD FQLWATHIGTDPL  
KL  
FIDTTRPTQLLYLQTIMLNLQIIYAQDSAATTWLAEQEANATTLFGSLRYGFSPALKQALHQEADALLNG  
LG  
DVTNLATRIGELNGALNHQGFADKPWMKALKQP VQGTFKALGELARGAGKATLESILLAWVPIDSRMAG  
KQ  
QNI VALLR TLLIGQILLDSKARIAVDQVFTK LKQWIREWQVLNKQISDIRRSWLYPTAYNTRKSNASHL  
RV  
LEEKLR LHESIPALLDYQNNQYAKQLQDEIRLHFQSGK TMAKDWLTTAKRWIDGLGGIAGAITWGVIML  
NF  
INTALTYRDLTRDGD FSAKDIGKVTYGLGYSFNLLMAVFVEAPWSVIRDATPVLIDGKNVGVLDRSSAYW  
KA  
KGNVTWGD AIRGFRVSMVAMGGFGIAAVVLELFDITDDFHEAKTS GEEYGIGIKGFSVLVMGLGSAAQLL  
AG  
IFPAGVFTIIAMNPWF SVALMATGFIYLIATMALNYFKQDSV GWWLRKCCWSRTLAYRYAETAEGEQEEV  
RA  
LMEIQLSPQVHAKSTVHYEDRYLGKGDYYSVAVQNGAGVQVRLPNLLRGQSVHFNI VSSKRPWGVL PVEK  
MD  
DPLHEAFLDRGQFRKAEQFGTLTNKQAGKTS EDFTYPLMPENEDLIWETWVPLDKDATYLELQIWYPNN  
LI  
NPGQDDRGYLFQME LGTRGDTDIDGLAAVELEVQASSRIGTLTLEVAESTPL-----  
--  
-----  
--  
-----  
--  
-----  
--  
-----  
--

>A0A0P9LGL2\_PSEA0/1-1158

MVGMHLGMYFCIQRAKLPVSAQRVSHMTDKHGTHQRRRAALFPKTPATATSLC PFRGPNVAIVPVRYALD  
RS  
RYDAAPEQLKPLPKQGK WALMPTLKTRSYTLRQLYDGYVYVFDETAGTLHEYVASANNGHLSRIVWTDQAQ  
IG  
NDQRSGASDGKPFLLYPRRNTLHIAFSPQQWTRVCEHMRSSAPSRALWMKALDLASYCITMAEPDTLPL  
NR  
IAEAVADIDKGHVADDDRFADSAIPTARPLSEDAETHLLWAPLGADVFWQGSVDDQDSSLLIALDDPLAV  
FN  
DLGMQLAADQAAFRDWQAEHEHKIQIAQTVSGLCGAESDPQKLPASVRGNAARTHQYLSEVEAYFEQCIL  
EE  
AQISSSNVPGDFLLL PDMFKSLDMRKSIEARYGSVPTEEAQAQWKDRHKWRREVDLSGARQYLQQHLPSG  
DA  
LLQQVRDTQRDFQLWATHIGTDPLQLFIDTTRPTQLLYLQTIMLNLQIIYAQDSAATTWLAEQEANASTL  
FG  
TLRYGFSPALKQALHQEADALLNGLGDVTNLATRIGELNGALNHQGFTDKPWMKALKQPVQGTFKALGEL  
AS  
GAGKATLESILLAWVPIDSRMALGKQONIVALLRTLLIGQILLDSKARIAVDQQVFTKLKQWIREWQVLN  
KQ  
ISDTRRRWLYPNAYNTRQSTARNLHAHKQKLRVHEL SIPALLDFQNEYAKLLQDEIRQYFQSGKTLAKD  
WL  
AQAKRWTDRLLGGTAGSITWGVIMLNFINTALTYRDVTRDGD FSAKDIGKVTYGLGYSFNLLMAVFVEAPW  
SV  
IRDATPELIDGKNVAILDRSSAYWKTGNATWGNAIRGFRVSMVAMGGFGVAAVTLELFGITDDFHEAKT  
SG  
EEYGIGIKGFSVLVMGLGSAAQLLAGIFPAGVFTIIAMNPWF SVALMATGFIYLIATMALNYFKQDSVGW  
WL  
RKCCWSRTLAYRYAETAEGEQEEVRALMEIQLSPQVHAKSTVHYEDRYLGKGDYYSVAVQNGAGVQVRLP  
NL  
LRGQSVHFNIVSSKRPWGLPVEKIDDPLHEAF LDRGQFRKAEQFGTLTNKQAGKTSDFTYPLMPPE  
DL  
IWETWVPLDKDATYLELQIWYPNNLINPGEDDRGYLFQMELGTRGDTAIDGLAAVELEVQASSRIGTLTL  
EV  
AESTPL-----  
--  
-----  
--  
-----  
--  
-----

>A0A454G7X5\_PSESF/1-1132

MTDKNGTHQRRRAALFPKTPATATSLC PFRGPNIAIVPVRYALDRSRYDADPRQLKPLPKDGYWARLPTL  
KT  
RSYTLRQLYDGYVYVFNETAGTLHEYAASASDGHLSRIVWTD A HIGNDQRNGAGEGQPFLLYPRDHRLHI  
AF  
SPMQWTRMCEHMRSHAPSRALWMKALDLASYCLTMAEPDTLPLDR IAEAVADIDKDRVDDGRFADSAI  
PT  
ARPPSEGAEPDPLWAPLGADVFWQGSVYDQDSSLVIALDDPLAVFNDLGMQLAADQAAFREWQSAHEHKI  
QI  
AQT VATLCGAESEPEKLPASVRGDALRTHQYLSEVEAYFEQCFEEAQIGSNAVPGLLLLLPDVFKSPDM

RR  
VIQARYGSAPTDEGAQAWKDRHKWRREVDLSGARQYLLQHLPTGDKRLQQRDTQSDFLWATHIGTDPL  
KL  
FIDTTRPTQLLYLQTIMLNLQIIYAQDSAANAWLAEQEANTSSLFGTLRYGFSPALKQALHQEADALLNG  
LG  
DVTNLATRIGELNGVLNHQGFAGKPWMTALKQPVQDTFKALGELASGAGKATFESVLLAWVPIDSRMALG  
KR  
QNIWALLRRTLLIGQILLDSTARVVIDEQAVTKLKQWVREWQVLNKQISDIRRRWLYPNAYNTRQSTARNL  
QA  
HKHKLRVHELIPALLDFRNNEYARLLQDEIRQYFQSGKTLAKDWLARAAGWTDRLGGTAGSITWGVVML  
NL  
INTAFLYRDLTRDGFSAKDIGKVTYGLGYSFNLLMAVFVEAPWSVIRDATPVLIDGKNVAILDRSSAYW  
KA  
KGNAAWGDPAIRGFRISMVAMGGFGLAAVTLELFDITDDFHAAKTSEEIYGIGIKGFSVMMGLGSAAQLM  
AG  
ISPAGVFTIIMSPWFSVALLATGFIYLLATMVLNYFKQGSVWLRKCCWSRTIDYRYAETAKGENEEI  
RA  
LMEIQLSPQVHVKSTAHYESRYLGKGDYYSVAVQNGAGVQVRLPNLLRGQSVHFNVISSKRPWGVLPVEK  
ID  
DPLHEAFLDRGQFRKVDQFGTLTNKPAGKASEDFTYPRMPENEDLIWETWVPLDKDATYLELQLWYPKN  
LI  
DPGEDDRSYLFQMELGTKGDTAIDGLAAVELEVKASSRVGALTLEVAEGTPV-----  
--  
-----  
--  
-----  
--  
-----  
--  
-----  
--

>A0A2V4RZH3\_PSESJ/1-1130  
MTDKSGTHTQRRATFAKTPATATSLCPRFGPDIAIVPVRYALDRSRYDAAPEKLPKLLKGSRWAVMPKL  
KT  
RSYTLRQLYDGYVYVYDETAGTFHEYVSSAADGHLSRIIWADAQIGSNRRSGADDGKPFLLYPRNNRLHI  
AF  
SAQQWTWRICEHLRSPESRASWMKALDLKRYCTTMAEPDTLPLNRIAEAVADIDKEYVVDDDRFADSAI  
PT  
SRASSEADPLFSPIGADVFWQGSVEDQDSSLLIALDDPLAIFNDLGMQLAADQAAYRNWQAEHEHKIQI  
AQ  
TVATLCGAESEPEKLPASVRGNAALTHQYLSVVEAYFEQCMFEQEIQGNNTAPGGVLLLDPDFKSPQMRR  
SL  
EMRYGSAPSEEALQAWKDRHKWRREVDLSGARQYLLQHLPTGDTLLKQVRDTQSDFFQQWTTHLGTEPLKL  
FV  
DTAHPESLLYLQTVMLNLQIIYAQDNAASAWLAEQEANDSSLFGTLRYGFSPALKHALHQEANALLNGLG  
DI  
TNLATRIGELNGTLNHQGFAGKPWMTALKQPVQDTFKALGQLASDAGKATFESILLAWVPIDSRSLAVGKQ  
QN  
IVALIRTLLIGQILLDSKARIAIDHTMLAKLKNWISEWQVLNKQISDTRRSWLYPTAYTPRKSIAHLRT  
LE  
EKLRHELSPALLDFQNNQYAKQLQDEIRLHFQSGKAITKEWLSTARRWLDGLGGIAGSITWGVIMLNF

IN  
TAFTYRDLTRDGNFSAKDIGKVTYGLGYSFNLLMAVFVEAPWVVISTAKPLSIGGYDIGILDKSAAYWKA  
RG  
NAVWGD AIRGFRGSMVAMGAFGIAAATLELKDILEDFDAARTLEEK TALS VKGASV FVMGAASTVQLSAG  
IS  
PASTITTIAMSSWLSIVLLMTGFIYLFATIALNHFKQDSVGVWLRCCWSKTVNFRHPETTKGEHEEIQT  
LL  
EIQLS PQVYVKSTVHYEDRYLGKGDYMRVAVQNGAGVQVRLPNLIRGNSLHFNVISSRRPWGLLPVEKID  
RP  
IQDSFLNRGQFRRVEQFKMFSNEPTGKASEDFTYPLMPPEDEDLIWETWVPLDKDATYLELQIWYPSNLI  
HS  
GEEDRGYLFQIELGTRGDTESDGLAAVELEV KALSRTGALTLEVAGSKPL-----  
--  
-----  
--  
-----  
--  
-----  
--  
-----  
--  
-----  
-----

>A0A2V0R6H9\_PSESF/1-1132

MTDKNGTHQQRAALFPKTPATATSLCPFRGNIAIVPVRYALDRSRYDVNPTQLKPLPKDGQWARLPTL  
KT  
RGHTLRQLYDGYVYVFD ETAGTLHEYAASASDGHL SRIAWTDAHIGNDQRNGAGEGQPFLLYPRDNRLHI  
AF  
SPMQWTWRICEHMRSHAPS RALWMKALDLASYCLTMAEPDTLPLDRIAEAVADIDKDRVDDGRFADSAI  
PT  
ARPPSEGAEPDPLWAPLGADVFWQGSVYDQDSSLVIALDDPLAVFNDLGMQLAADQAAFREWQSVHEHKI  
QI  
AQT VATLCGAESEPEKLPASVRGDALRMHQYLSEVEAYFEQCDFEDAQIGSNTVPGLLLLLPDVFKSPDM  
RR  
AIQARYGSAPTDEAAQAWKDRHKWRREVDLSSARQYLLQHLPTGDKRLQQRDTQSD FQLWATHIGTDPL  
KL  
FIDTTCPAQLLYLQTIMLNLQIIYAQDSAANAWLAEQEANTGSLFGTLRYGFSPALKQALHQEADALLNG  
LG  
DVTNLATRIGELNGVLNHQGFAGKPWMKALKQPVQDTFKALGELASGAGKATFESVLLAWVPIDSRMALG  
KQ  
QNI VALLR TLLIGQILLGSTARVAINEQAVTKLKQWVREWQVLNKQISDIRRRLYPNAYNARQSTARNL  
QA  
HKHKLRVHEL SIPALLDFQNEYARLLQDEIRQYFQSGKTLAKDWLARA KGWTDRLGGTASSITWGVVML  
NL  
INTAFLYRDLTRDGFSTKDIGKVTYGLGYSFNLLMAVFVEAPWSVIRDATPVLIDGKNVAILDRSSAYW  
KA  
KGN AVWGD AIRGFRAS MVAMGGFGLAAVTLELFDIADDFYAAKTSEEEYGLRVKWSSVLMMGLGSAAQLF  
GG  
LFPASAF AI IAMNPWFSVALFATGFIYLLATMALNYFKQDGVGWLRKCCWSNTVNYRYAETADGEHEEV  
RA  
LMEIQLSPKIHVKSTVNYENRYLGKGDYYSVAVQNGAGVQVRLPNVLRGQTVHFNVISSKRPLGVL PVEK  
ID  
QPIHEAFLDRGQFRNTEQFGTLTNKPAGKASEDFTYPRMPPEDEDLIWETWVPLDKDATYLELQLWYPAN

LL  
NPGGDDRSYLFQMELGIRGDTAIDGVAAVELEVKAISRIGALTLEVAEGTPV-----  
--  
-----  
--  
-----  
--  
-----  
--  
-----  
--

>A0A3M3HGZ4\_9PSED/1-1058  
MTDKNGTRQQRRAACFARTPATATSLCPFRGPNVAIVPVRYALDRSRYDVAPGQLKPLPKDGKWARQPPL  
KT  
RSHTLRQLYDGYVYVFDDETADTLHEYAVSALSGQLSRIVWAEAQIGNDQRNGASDGKPFIFYPRRNMLHI  
AF  
SPIQWTWRLCEHMRSNAPSRALWMKALDLARYCTSMAEPDTLPLDRIAEAVADIDLGHVIDDGRFADTSA  
PT  
ARPLSEDPDAQPSWAPLGADVFWQGSVGDQDSALVIALDDPLAVFNDLGMQLAADQAALRDWQSEHEHKI  
QI  
AQTVATLCGAESETDKLPASVRDNTLQTHQYLSELEAYFEQCDFEAAQIGSNTVPGGLLFLPDVFKSPDM  
RK  
SINARYGSNPTEEGAQVWKRHKWRREVDLTGAREYLLQHL PAGDRLRQQVRETQSDFRLWSTHIGTEPL  
KL  
FIDTTNTEALLYLQTTMLNLQIIYAQDSAASAWLAEQEINTNSLFGTLRYGFSAAKQALHEEADALING  
LG  
DVTNLATRIGELNGALNHQGFADTPWMKSLKQPVDTFKVLGELASGAGKATLESILLAWVPIDSRMAG  
KQ  
QNIVALIRTLIGQILLDSPARIEINQOMLIKQWVREWQVLNRQINDIRRSWLYPTAYNTRQSTSRNL  
HA  
HIQKLRLHELSPALLDFQNNQYAKQLQDEIRQYFQSGKTLTKDWLARAkwTDRLGGTAGTITWGVVML  
NL  
INTAFLYRDLTRDGFSTKDIGKVTYGLGYSFNLLMAVFVEAPWAIISTAKPLVIGGYDVGILDKSAAYW  
KA  
QGNVWGD AIRGFRGSMVAMGGFGLAAVTLELFDVADDFYAAKTSEEEYGLRVKWSSVLMMGLGSAAQLF  
AG  
FFPASAF AIAMNPWF SVALFATGFIYLLATMALNYFKQDSVGWWRKCCWSNTANYRYAETADGEHEEV  
RA  
LMEIQLSPQVHVKSTVNYENRYLGKGDYYSVAVQNGAGVQVRLPNVLRGQTVHLNVISSKRPLGVLTVKK  
ID  
PPIYEAF LDRGQFRNTEQFGMLTNKPAGKASEDFTYPRMPENEDLIWET-----  
--  
-----  
--  
-----  
--  
-----  
--  
-----  
--  
-----  
--

>A0A0P9SDQ6\_PSEA0/1-1135

MPRMTDKHGTHQRRRAALFPKTPATATSLCPFRGPNVAIVPVRYALDRSRYDAAPEKLPKQKWTLM  
PI  
LKTRSYTLRQLYDGYIYVFEDETAGTLHEYVASANNGHLSRIVWTDQAIGRDQRSGASDGKPFLLYPRRHQ  
LH  
IAFAPQQWTWRVCEHMRSSAPSRALWMKVLDLAGYCITMAEPDTLPLNRIAEAVADIDKGHVNDGGRFAD  
SA  
IPTARPLSEDAETNPLWAPLGADVFWQGSVDDQDSSLLIALDDPLAVFNDLGMQLAADQAAFRDWQARHE  
HK  
IQIAQTVSGLCGAESDPQKLPASVRGNAARTHQYLSEVEAYFEQCILEEAQISSSNVPGDFLLL PDMFKS  
LD  
MRKSI EARYG SVPT EEAQ TWKDRHKWRREVDLSGASQYLQQHLTSGDALLQQVRDTQRDFQLWATHIGT  
DP  
LKLFI DTT RPTQLLYLQTIMLNLQIIYAQDSAATTWLAEQEANASTLFGTLRYGFSPALKQALHQEADAL  
LN  
GLGDVTNLATRIGELNGALNHQGFADKPWMKALKQPVQGTFKALGELASGAGKATLESILLAWVPIDSRM  
AL  
GKQQNIVALLR TLLIGQILLDSKARIAVDQQVFTK LKQWIREWQVLNKQISDTRRRWLYPNAYNTRQSTA  
RN  
LHAHKQKLRVHEL SIPALLDFQNEYAKLLQDEIRQYFQSGKTLAKDWLAQAKRWTNRLGGTAGSITWGV  
IM  
LNFINTALTYRDVTRDGD FSAKDIGKVTYGLGYSFNLLMVVFVEAPWSVIRDATPVLIDGKNVGVLDRSS  
AY  
WKAKGNATWSDAIRGFRVSMVAMGGFGVA AVTLELFDITDDFYAAKTPEEKNTIIVKGISIFAMGVGSTF  
QF  
IAGLSPASTFTIVAMSPWFSVALLVIGSIYLF TTMALSYFKQDSVGVWLRKCCWSRTL DRYRPETVKGES  
EE  
VRALMEIQLSPQVYVKSTVHYESRYLGKGDHYSVAVQNGAGVQVRLPNLVRGQSVHFNVISSKRPWGVLP  
VE  
KIDDP LHEAFLAHGQFRKTEQFGTL TNKPAGKASEDFTYPLMP PENEDLIWETWVPLDKDATYLELQIWY  
PS  
NLIHPGEEDQGYLFQME LGTRGDTAIDGLAAVELEVKTSSSVGTLTLEVAEGTPV-----  
--  
-----  
--  
-----  
--  
-----  
--  
-----  
--  
-----  
-----

>A0A454G899\_PSESF/1-1132

MTDKNGTHQRRRAALFPKTPATATSLCPFRGPNIAIVPVRYALDRSRYDVNPTQLKLPKDGQWARLPTL  
KT  
RGHTLRQLYDGYVYVFEDETAGTLHEYAASASDGHLSRIA WTD A HIGNDQRNGAGEGQPFLLYPRDNRLHI  
AF  
SPMQWTWRICEHMRSHAPS RALWMKALDLASYCLTMAEPDTLPLDRIAEAVADIDKDRVDDGGRFADSAI  
PT  
ARPPSEGAEPDPLWAPLGADVFWQGSVYDQDSSLVIALDDPLAVFNDLGMQLAADQAAFREWQSVHEHKI  
QI  
AQT VATL CGAESEPEKLPASVRGDALRMHQYLSEVEAYFEQCFEDAQIGSNTVP GGLLLL PDVFKSPDM

RR  
AIQARYGSAPTDEAAQAWKDRHKWRREVDLSSARQYLLQHLPTGDKRLQQVRDTQSDFLWATHIGTDPL  
KL  
FIDTTCPAQLLYLQTIMLNLQIIYAQDSAANAWLAEQEANTGSLFGTLRYGFSPALKQALHQEADALLNG  
LG  
DVTNLATRIGELNGVLNHQGFAGKPMKALKQPVDQTFKALGELASGAGKATFESVLLAWVPIDSRMAG  
KQ  
QNIIVALLRLLIGQILLGSTARVAINEQAVTKLKQWVREWQVLNKQISDIRRRWLYPNAYNARQSTARNL  
QA  
HKHKLRVHELIPALLDFQNNYARLLQDEIRQYFQSGKTLAKDWLARAAGWTDRLGGTASSITWGVVML  
NL  
INTAFLYRDLTRDGFSTKDIGKVTYGLGYSFNLLMAVFVEAPWSVIRDATPVLIDGKNVAILDRSSAYW  
KA  
KGNVWGD AIRGFRASMVAMGGFGLAAVTLELFDIADDLYAAKTSEEEYGLRVKWSSVLLMMGLGSAAQLF  
GG  
LFPASAFI IAMNPWF SVALFATGFIYLLATMALNYFKQDGVGWLRKCCWSNTVNYRYAETADGEHEEV  
RA  
LMEIQLSPQIHVKSTVNYENRYLGKGDYYSVAVQNGAGVQVRLPNVLRGQTVHFNVISSKRPLGVLPVEK  
ID  
QPIHEAFLDRGQFRNTEQFGTLTNKPAGKASEDFTYPRMPENEDLIWETWVPLDKDATYLELQLWYPAN  
LL  
NPGGDDRSYLFQMELGIRGDTAIDGVAAVELEVKAISRIGALTLEVAEGTPV-----  
--  
-----  
--  
-----  
--  
-----  
--  
-----  
--  
-----  
--  
-----

>A0A0P9Q601\_PSESX/1-983  
MVGTHLGMFYFCIQRAKLPVSAQRVSHMTDKHGTHQORRAALFPKTPATATSLCPFRGPNVAIVPVRYALD  
RS  
RYDAAPEKLPKPKQGKALMPTLKTRSYTLRQLYDGYLYVFDETAGTLHEYVASANNGHLSRIVWTDAQ  
IG  
SDQRSGASDGKPFLLYPRRNTLHIAFSPQQWTRVCEHMRSSAPSRALWMKALDLASYCITMAEPDTLPL  
NR  
IAEAVADIDKGHVTDDGRFADSAIPTARPLSEDAETNPLWAPLGADVFWQGSVDDQDSSLLIALDDPLAV  
FN  
DLGMQLAADQAARFDWQAEHEHKKIQAQTVSGLCGAESDPQKLPASVRGNSALTHQYLSEVEAYFEQCIL  
EE  
AQISSSNVPGDFLLL PDMFKSLDMRKSIEARYGSVPTEEAQTWKDRHKWRREVDL SGARQYLQHLPSG  
DA  
LLQQVRDTQRDFLWATHIGTDPLKLFIDTTRPTQLLYLQTIMLNLQIIYAQDSAATTWLAEQEANASTL  
FG  
TLRYGFSPALKQALHQEADALLNGLDVTNLATRIGELNGALNHQGFADKPMKALKQPVQGTFKALGEL  
AS  
GAGKTTLESILLAWVPIDSRMAGKQNIIVALLRLLIGQILLGSKARIAVDQVFTKLKQWIREWQVLN  
KQ  
ISDTRRRWLYPNAYNTRQSTARNLHHTHKQKLHVHELIPALLDFQNKYAKLLQDEIRQYFQSGKTLAKD

WL  
AQAKRWTDRLGGTAGSITWGVIMLNFINTALTYRDLTRDGDFSAKDIGKVTYGLGYSFNLLMAVFVEAPW  
SV  
IRDATPELIDGKNVAILDRSSAYWKTGNATWGDAIRGFRVSMVAMGGFGIAAVTLEIIDNHDDWRKSKN  
PT  
EKNATVMKGLATAAMGLGSLAQLLAGISPASRLTFLVMSPWFLALLTAGAIYLFATIALNYFKQDSVSW  
WL  
RKSCWSWTSEHRHAETVEDRNNVMRNFQEIQLSQPQIYVKSTVLNRPG-----  
--

-----  
--  
-----  
--  
-----  
--  
-----  
--  
-----  
--  
-----  
--  
-----  
--  
-----  
--

>A0A3M3NS21\_PSESS/1-969  
MVGMLHGMFYFCIQRAKLPVSAQRVSHMTDKHGTHQORRAALFPKTPATATSLCPFRGPNVAIVPVRYALD  
RS  
RYDAAPEQLKPLPKQGWALMPTLKTRSYTLRQLYDGYVYVDFETAGTLHEYVASANNGHLSRIVWTDQAQ  
IG  
NDQRSGASDGKPFLLYPRRNTLHIAFSPQQTWRVCEHMRSSAPSRLWMKALDLASYCITMAEPDTLPL  
NR  
IAEAVADIDKGHVADDGRFADSAIPTARPLSEDAETHLLWAPLGADVFWQGSVDDQDSSLLIALDDPLAV  
FN  
DLGMQLAADQAAFRDWQAEHEHKKIAQTVSGLCGAESDPQKLPASVRGNAARTHQYLSEVEAYFEQCIL  
EE  
AQISSSNVPGDFLLL PDMFKSLDMRKSIEARYGSVPTEEAQAQAWKDRHKWRREVDLSGARQYLQHLPSG  
DA  
LLQQVRDTQRDFQLWATHIGTDPLQLFIDTTRPTQLLYLQTIMLNLQIIYAQDSAATTWLAEQEANASTL  
FG  
TLRYGFSPALKQALHQEADALLNGLGDVTNLATRIGELNGALNHQGFTDKPMMKALKQPVQGTFKALGEL  
AS  
GAGKATLESILLAWVPIDSRMAGKQONIVALLRLLIGQILLDSKARIAVDQQVFTKQWIREWQVLN  
KQ  
ISDTRRRWLYPNAYNTRQSTARNLHAHKQKLRVHEL SIPALLDFQNNYAKLLQDEIRQYFQSGKTLAKD  
WL  
AQAKRWTDRLGGTAGSITWGVIMLNFINTALTYRDLTRDGDFSAKDIGKVTYGLGYSFNLLMAVFVEAPW  
SV  
IRDATPELIDGKNVAILDRSSAYWKTGNATWGNAIRGFRVSMVAMGGFGVAAVTLELFGITDDFHEAKT  
SG  
EEYGIGIKGFSVLV MGLGSAAQLLAGIFPAGVFTIIAMNPWFVALMATGFIYLIATMALNYFKQDSVSW  
WL  
RKCCWSRTLAYRYAETAEGEQEEVRALMGDCQK-----  
--

---  
-----  
---  
-----  
---  
-----  
---  
-----  
---

>S3MFB0\_PSESY/1-1132  
MTDKSGTLTQRRATFAKIPATATSLCPFRKPEIAIVPVRYALDRSRYDAAPQKLKPLL TGSRWAVMPKL  
KT  
RSYTLRQLYDGYVYVYDETAETLHEYAVSAATGNLSRIVWTDQIGSDRRSGTDDGKPFLLYPRNNRLHI  
AF  
SPQQWTRICEDLRSNPASRASWMKMLDLKRYCMTMAEPGTLPLNRIAEAVADIDKEHVDDGRFADSAI  
PA  
ARPPSDSDEGKALFSPIGADVFWQGSVEDQDSSLLIALDDPLAIFNDLGMQLAADQAAYHNWQAEHEHKI  
QI  
AQTVTALCGAEGEPEKLPASVRGNAALTHQYLGELEAYFEQCILEEAQISSSNVPGDFLLMPDMFKSLDM  
RK  
SIEMRYGSAPSDEALQAWKDRHKWRREVDLSGARAYLQOHLPTGDTLLQQVRDTQSDFRQWSAHLGTEPL  
KL  
FVDTTHPQSLLYLQTVMLNLQIIYAQDNAASAWLAEQETNDSSLFGTLRYGFSPALKHALHQEANALLNG  
LG  
DITNLATRIGELNGTLNHQGFAEKPWMKALKHPVQDTFKALGQLASGAGKATFESILLAWPIDSR LAVG  
KQ  
QNIVALIRTLLIGQILLDSNARIAIDQKMFTKLKSWISEWRVLNKQISDTRRSWLYPTAYNPRKSIASHL  
RA  
LEQKLRLHELSPALLDYQNNQYAKQLQDEIRLHFQSGKAIKDWLSTARRWLDGLGGIAGSITWGVIML  
NF  
INTALTYRDLTRDGFSAKDIGKVTYGLGYSFNLLMAVFVEAPWAVIREATPVLIDGKNVGILDRSAGYW  
RA  
KGNAAWSDAIRGFRVSMVAMGGFGLAAVTLELFDVTNDFYAAKTSEEKNAIIVKGISIFAMGVGSTFQLM  
AG  
LSPASTFTIVAMSPWFVSVALLVIGSIYLF TTLALS YLKQDSVGWWRKCCWSRTLDYRYPETAKGESEEV  
RA  
LMEIQLSPQIHVKSTVHYESRYLGKGDYYSVAVQNGAGVQVRLPKLVRGESVHFNI VSSKRPWGVL PVEK  
ID  
DPLHQAF LDRGQFRKAEQFGTLTNNPAGKASEDFTYPLMPPENEDLIWETWVPLDKDATYLELQIWYPTN  
LI  
NPGEDDRSYLFQMELGTRGDTAIDGLAAVELEVKASSRIGTLTLEVAEGTPV-----

---  
-----  
---  
-----  
---  
-----  
---

>Q500A3\_PSEU2/1-1126

MTDKSGTHTQRRATFAKTPATATSLCPFRGPDIAIVPVRYALDRSRYDAAPEKLPKLLKGSRWAVMPKL  
KT  
RSYTLRQLYDGYVYVYDETAGTFHEYFSSAANGHLSRIIWTDAQIGSDRRSGADDGKPFLLYPRNNRLHI  
AF  
SAQQWTWRICEHLRSNPASRASWMKALDLKRYCMTMAEPDTLPLNRIAEAVADIDKEHVDDDRFADSAI  
PT  
SKASSEADPLFSPIGADVFWQGSVEDQDSSLLIALDDPLAIFNDLGMQLAADQAAYRNWQAEHEHKIQI  
AQ  
TVTALCGAEGEPEKLPASVRGNAALTHQYLSEVEAYFEQCMFEQEQIGNNTAPGGVLLLDPDFKSPQMRR  
SL  
EMRYGSAPSDEALQAWKDRHKWRREVDLSGARQYLQQHLPTGDTLLQQVQDTQSDFRQWSTHLGTEPLKL  
FV  
DTSHPESELLYLQTVMLNLQIIYAQDNAASAWLAEQEANDSSLFGTLRYGFSPALKHALHQEANALLNGLG  
DI  
TNLATRIGELNGTLNHQGFADKPWMKALKQPVQDTFKALGQLASDAGKATFESILLAWPIDSR LAVGKQ  
QN  
IVALIRTL LIGQILLDSKARIAIDHNMLAKLKTWISEWQVLNKQISDTRRSWLYPTAYNPRKSIASHLRV  
LE  
EKLRLHEL SMPALLDFQNNQYARQLQDEIRLHVQSGKAITKEWLT SARRWLDGLGGIAGSITWGVIMLNF  
IN  
TAFTYRDLTRDGFSAKDLGKVTYGLGYSFNLLMAVFVEAPWAVIRDATPVLIDGKNVGILDRSAGYWRA  
KG  
NLVWGD AIRGFRVSMVAMGAFGVAAVLEVLDIQDDL SRVNTSEEIIAMQLKFASVLMGAGSAIQLIAG  
IF  
PTTPLTAVAMSPWFSITLLLIGTVYLFATTALNYFKQDSVGVWLRCCWSRSIEYRYSTDAGGQHAEKLD  
LL  
TIQLSPQVHVKITTRLESRYLGKGDYYSTAVQDGAGVQLLFP S AVRAQSVHFNI ISSKRPWGVL PVEKID  
SP  
INESFLNRGQFRQAGQFGTLGNKAARNAHEDFTFPLMPHESEDLIWETWIPLAEATYLELQIWYPDSL I  
KP  
DQQDIGYLYQLKLNREGDTKVDGLITAELEV KALNRSTALTLEVAE-----  
--  
-----  
--  
-----  
--  
-----  
--  
-----  
--  
-----

>W0MTI8\_PSESX/1-1128

MTEKYGTRQRRATHFPKTPATATSLCPFRGPNIAIVPVRYALDRSRYDTPKQLKPLTKDGKWARLPKL  
KT  
RSYTLRQLYDGYVYVYFDETAQTLHEYVASAIGGHLNRIVWTD A HIGNDQRNSASDGQPFLLYPRSNLLHI  
AF  
SPVQWTWRLCEHMRSNPPSRALWMKALDLKRYCITMAEPDTLPLNRIAEVVADIDEGKVVEDGRFADSAI  
PT  
ACPPSDDNVTQALFSPLGADVFWRGSVDDQDSSLLIALDDPLAVFNDLGMQLAADQAAYLNWQAEHEHKI  
QI  
AQTVTTL CGAESEQEKL PASVRGNTLLTHQYLS DVEAYFEQCILEEAQISSSSAPGDFLLL PDMFKSLDL

RK  
AIEARYGSAPSEQGLQVWKDRHKWRREVDLNGARQYLLQHLSTGEKGLQQVRDTQSDFFQHWATRLGTEPL  
KL  
FIDTTNPKNLLYLQMIMLNLQIIYAQDDAANAWLAEQEANTSSLFGTLRYGFSPTLKHALHQEADALLNG  
LG  
DVTNLATRVGELNGALNHQGFADKPWMKSLKQSAQDTFKALGELSSGAGKATLESILLAWVPIDSRLTVG  
KQ  
QNIIVALIRTLLIGQVLLDSPARIAINQHVITQLKQWIREWRVLDKQISDTRRSWQYPTAYQPRKSIARDL  
AA  
HQQKLRAHELSPALLDFQNEAYAKQLQSEIRQYAQTGKDWLAQAKRWIDNLGGIAGSITWGVIMLNFIN  
TA  
LTYRDLTRDGFVSKDIGKVTYGLGYSFNLLMAVYVEAPWNAIKNAKPVLIDGKNVGILDKSAAYWKAKG  
NV  
AWAEAIGGFRGSMIAMGAFGIAAATLELKDISDFNAARTLQEKTAVKGIAMGAGSIIQLLAGVS  
PA  
STPTIIATGSWFSVALLVAGFIYLFATMALNYFKQDSIGWLLRCCWSRTIDYRYPDSTKGKYEERALL  
EI  
QLSPQIYVKSTVHYEDRYLGKGDYISVAVQNGAGVHVRLPGMVRGHSVHFNVISSKRPWGVLVPEKIDHP  
IH  
ESFLDRGQFKKAEQFGTLTNTPSGKASEDLTFPRMPENEDVIWETWVPLDKGATYLELQIWYPTTLISP  
GG  
DDRGYLFQMELGIRGDTDVDGLDVELEVKASSRMGSLTLEVAESTPV-----  
--  
-----  
--  
-----  
--  
-----  
--  
-----  
--  
-----  
--  
-----

>A0A066RSF6\_9GAMM/1-1404  
MSFKNNHPPVRYVNAAFPPLDERLCNSKAEPVPDVEPAPGFGYTVAFACRMETFRQYVSPYLSLQLKKTE  
EE  
AAIRQWDEKPGQHHTYVACDVRAAEKSLAVRWYNSPSSMLVIDAVEPHDACSAVVKEAFVPRPAIRMG  
EQ  
LGLPTEGYLYHFLEGRVSEFRCMGDTYPRFQVTQSRPEAMYPEPAVDRPLEYILALWQRNGQVIQDQYL  
LY  
SREALSDEAIQSMDTAFLQAHGVRLDMHQMIPLTENSQRQKHTVAEGETLSEIAEQHQITLETLLALNP  
YW  
RGRETKLTIGSSLYLEPVGIYNHGQDVSYPVSAALLGEGVFAIEPSKTRADFPVVQVAESDGRFTALSP  
VR  
YALDACNAQGQGLHPIPDTEFSGGIFQADDTPYTLRQLRDGWLYALSPVPDSETWTLEEKIEQGEFRR  
VI  
GQTAEARQKAEPGRPKTHILCVSDRPYYLAYAVKRWTDRICDYLLGNAEARDCWLRQVNLNTSGAATHRT  
DV  
AQVECYVADVNAQAQERFAGTCAPLSGDVDRPNDFIHIPKKTASYTYQAPSAYAQQIVALDDPLADLS  
DL  
YLALLEPVLTTTPDEPTHRKVVLAEAIRSMVRVPIPKDKMPEILPEQWVEFESALDVCLEYEYQKVHLPQ  
LG  
SDNMMPQRLKDLEAYRQASLKAQATLEGMGFFGVEDYVQDYTDRRKAHSQVNWDDLDAFYKDYLASQSHA

YA  
AIPGAFDRLLSALPKLGTEPMHLGLDILYSDHMGYLMELFGELLPALNSSAHDETMQRKLADALIQEKPD  
NL  
MALASSFFSAEFYAKTDELVKESDVIDLQRESVPVTGTVVAGLNSVLGYGLKSESGLYHLTLAMAVPLDGL  
IE  
SAIGALNKVTGQGFQRGCLTYQGIAMRKAGFRAGFNVAAMAWSLEQVSQGKIGMNPAFEGTSRAYRQRFT  
GA  
VLEWQSLENQLKRMPADSSNRASLELKQQKMEARVGMVTEAPGVFESFNGQDLRSYHGFVDRASQGF  
SR  
IG  
RLDFVVAFLNAINVVAQIAVAAILASTPNVDASTQLHVVGSTAWLMHATSEIFRGLAFERVKQHSVLL  
NQ  
RLNQIVSSGKIDVKAIAQNYVKRSVMTGMLGVIAAGWEAYRTFLDAGKADFNLEKGLLYTKSLILGVQ  
G  
FT  
WGILAIRGLISSANRLAIGAVLQGMVAAWLWLGIAYLVSVLLNMLQKSPLNWLKSIWGKEPQGDWT  
AT  
AEYQALLQILNQPIQGTVKSFKQLPGTVASPYAPLPYTFQOQLKITFPQQRPGQCVSVGTVSGLRERE  
VY  
EGYHKVMKVDAFSYPLTALDIARGYWEYDEHKVPALVLDIPIWVERIDTIRVFATVNNRNPFAETAQTAQ  
HY  
QYQLHPQLKTETDVMKDGKASDMIGHQLFSVKIEEL  
>A0A0Q5F031\_9PSED/1-1130  
MENLKQGTVRQCRATEFDKTPATGTSLCPFKGAGIAIVPVRYALDRSRYPNPTARKLLPKTGKWPALPS  
IR  
SRTYTLRQLYDGYVYVFEDETAGTFHEYAYSASDAGLQRIVWTD AHLGQDIRTGSGEAQPYLIYPRKNTLH  
IA  
YAPVQWTWRICEHMRSHEDSRALWMKRLDLAGYCITMNEPGTLPLESEMAKAVADV DAGEVHEDFRFYDAA  
IP  
STKPPFNPQEGEAAWVPLGADVHWLGSVPDKDSALLIALDDPLAIVKDLGMQLAGDLAAYQTWQAHEQHK  
VD  
MAIAVTGLCGMPSQPDSKQSPWPWIKDDPVSIQQYLLDMEAYLEQLALEEAQALGSGTTLDVAQQPVTD  
P  
PS  
LRMHETLVQRYKPSPTAEIQDWNARSKWRMQADLKAARLHLQQQLPILKRLQSQIENTRSDFRQWFEHI  
GI  
EPLKLFIDTANPNTLLYLQTITEELLTLWGQHDDAVGWINAQEDQATT LFGTLRYGFSAPLKEALHHQAD  
RL  
LNGLGDITNLVTRAGELNAVLNHSGFADAAMKALKQPVDTFKAMKELATGRGKQVAQAAILIALIPADS  
RL  
AQGKQPNLIALLRNFLIGKVLINTEGGTKIDEAFDKKLQAWERERLRLQRDLNIVQQRWFYPGKPWVRQS  
LT  
HDVNARDARLQAHD LKIPMLIDFRNNEYAKLFRQEIEKFFHSGKNVARHWQQHVRNVTKEWGIHGASISW  
SV  
IMLNFINTALVWQEVGRDGNLSAKDMVKVGYNLGYSFNLLMALYVEAPWEIVKSAQPVKVGYEVEGILER  
SA  
AYWKARGNTTWANAVSGFKIRLFATGAFIAAATGLEIWDLYDDYKNSNTEDEKKIIIKGFVSMALGG  
TL  
QIFSLLFKIKWIGAIMGPWFAASMLAAGMAYLFTTALLNFIKQDCVGLWLRKCTWARLPKYRHPETTDGQ  
KD  
EIKALLEIQFSPHVIKATTEQEINTGRTYNSISKRN GAWIQIRFPKALRGRNALVNVIIISKQPLGVFP  
VE  
KIESSVQKEFFDKGAFHPLSDWGKITNRRPELGFYPSIFPAIPEKEDIWKAWIPLYEKADFLEFKVVYP

SD

IAHELAHEVSYLELQLELNDEGESTFDGLSKTELTVNHEKRADACQLFIMP-----

--

-----

--

-----

--

-----

--

-----

>A0A0P9YA54\_PSESS/1-946

MVGMHLGMYFCIQRAKLPVSAQRVSHMTDKHGTHQORRAALFPKTPATATSLCPFRGPNVAIVPVRYALD  
RS

RYDAAPEQLKPLPKQGKWMPTLKTRSYTLRQLYDGYVYVFEDETAGTLHEYVASANNGHLSRIVWTDQAQ  
IG

NDQRSGASDGKPFLLYPRRNTLHIAFSPQQWTWRVCEHMRSSAPSRALWMKALDLASYCITMAEPDTLPL  
NR

IAEAVADIDKGHVADDGRFADSAIPTARPLSEDAETHLLWAPLGADVFWQGSVDDQDSSLLIALDDPLAV  
FN

DLGMQLAADQAAFRDWQAEHEHKIQIAQTVSGLCGAESDPQKLPASVRGNAARTHQYLSEVEAYFEQCIL  
EE

AQISSSNVPGDFLLL PDMFKSLDMRKSIEARYGSVPTEEAAQAWKDRHKWRREVDLSGARQYLQQHLPSG  
DA

LLQQVRDTQRDFQLWATHIGTDPLQLFIDTTRPTQLLYLQTIMLNLQIIYAQDSAATTWLAEQEANASTL  
FG

TLRYGFSPALKQALHQEADALLNGLGDVTNLATRIGELNGALNHQGFTDKPWMKALKQPVQGTFKALGEL  
AS

GAGKATLESILLAWVPIDSRMALGKQONIVALLRLLIGQILLDSKARIAVDQVFTKQWIREWQVLN  
KQ

ISDTRRRWLYPNAYNTRQSTARNLHAHKQKLRVHELIPALLDFQNNYAKLLQDEIRQYFQSGKTLAKD  
WL

AQAKRWDRLGGTAGSITWGVIMLNFINTALTYRDVTRDGDFAKDIGKVTYGLGYSFNLLMAVFVEAPW  
SV

IRDATPELIDGKNVAILDRSSAYWKTGNATWGNAIRGFRVSMVAMGGFGVAAVTLELFGITDDFHEAKT  
SG

EEYGIGIKGFSVLVMGLGSAAQLLAGIFPAGVFTIIAMNPWFVALMATGFIYLIATMALNYFKQDSVGW  
WL

RKCCGISIFF-----

--

-----

--

-----

--

-----

--

-----

--

-----

--

-----

>A0A0Q0ACX3\_PSESS/1-946

MVGMHLGMYFCIQRAKLPVSAQRVSHMTDKHGTHQORRAALFPKTPATATSLCPFRGPNVAIVPVRYALD  
RS  
RYDAAPEQLKPLPKQGKWMPTLKTRSYTLRQLYDGYVYVDFETAGTLHEYVASANNGHLSRIVWTDQA  
IG  
NDQRSGASDGKPFLLYPRRNTLHIAFSPQQTWRVCEHMRSSAPSRALWMKALDLASYCITMAEPDTLPL  
NR  
IAEAVADIDKGHVADDGRFADSAIPTARPLSEDAETHLLWAPLGADVFWQGSVDDQDSSLLIALDDPLAV  
FN  
DLGMQLAADQAAFRDWQAEHEHKKIQAQTVSGLCGAESDPQKLPASVRGNAARTHQYLSEVEAYFEQCIL  
EE  
AQISSSNVPGDFLLL PDMFKSLDMRKSIEARYGSPVTEEAQAQWKDRHKWRREVDLSGARQYLQQLPSG  
DA  
LLQQVRDTQRDFQLWATHIGTDPLQLFIDTTRPTQLLYLQTIMLNLQIIYAQDSAATTWLAEQEANASTL  
FG  
TLRYGFSPALKQALHQEADALLNGLGDVTNLATRIGELNGALNHQGFTDKPWMKALKQPVQGTFKALGEL  
AS  
GAGKATLESILLAWVPIDSRMALGKQONIVALLRLLIGQILLDSKARIAVDQQVFTKLKQWIREWQVLN  
KQ  
ISDTRRRWLYPNAYNTRQSTARNLHAHKQKLRVHEL SIPALLDFQNEYAKLLQDEIRQYFQSGKTLAKD  
WL  
AQAKRWTDRLLGGTAGSITWGVIMLNFINTALTYRDVTRDGD FSAKDIGKVTYGLGYSFNLLMAVFVEAPW  
SV  
IRDATPELIDGKNVAILDRSSAYWKTGNATWGNAIRGFRVSMVAMGGFGVAAVTLELFGITDDFHEAKT  
SG  
EEYGIGIKGFSVLVMGLGSAAQLLAGIFPAGVFTIIAMNPWF SVALMATGFIYLIATMALNYFKQDSVGW  
WL  
RNCCGSISFF-----  
--  
-----  
--  
-----  
--  
-----  
--  
-----  
--  
-----  
--  
-----  
--  
-----  
--  
-----  
-----

>A0A2V3QKJ8\_9PSED/1-1126

MTDKSGTHTQORRAATFAKTPATATSLCPFRGPDVAIVPVRYALDRSRYDAAPEKLPKLLKGSRWAVMPKL  
KT  
RSYTLRQLYDGYVYVDFETAGTFHEYLSSAANGHLSRIIWTDQAIGSDQRSGGSDAKPFLLYPRSNLLRI  
AF  
SAQQWTWRTCEHLRSNSASRESWMKALDLKRYCMTMAEPDTLPLNR IAEAVADIDKEHVNEDDRFADSAI  
PT  
SKASSEADPLFSPIGADVFWQGSVEDQDSSLLIALDDPLAIFNDLGMQLAADQAAYRNWQAEHEHKKIQI  
AQ  
TVTALCGAEGEPEKLPASVRGNAAL THQYLSEVEAYFEQCMFEQEQIGNNTAPGGVLLLLPGIFKSPQMR

SL  
EMRYGSAPSDEALQAWKDRHKWRREVDLSGARQYLQHLPTGDTLLQVRDTQSDFRQWSTHLGTEPLKL  
FV  
DTSHPESELLYLQTVMLNLQIIYAQDNAASAWLAEQEANDSSLFGTLRYGFSPALKHALHQEANALLNGLG  
DI  
TNLATRIGELNGTLNHQGFADKPRMKALKQPVQDTFKALGQLASDAGKATFESILLAWPIDSRSLAVGKQ  
QN  
IVALIRTLIGQILLDSKARIAIDHNMLAKLKTWISEWQVLNKQISDTRRSWLYPTAYNPRKSIASHLRV  
LE  
EKLRLHELSPALLDFQNNQYARQLQDEIRLHVQSGKAITKEWLTSARRWLDGLGGIAGSITWGVIMLNF  
IN  
TAFTYRDLTRDGFSAKDLGKVTYGLGYSFNLLMAVFVEAPWAVIRDATPVLIDGKNVGILDRSAGYWRA  
KG  
NLVWGDAIRGFRVSMVAMGAFGVAAVLEVLDIQDDLSRVNTSEEIIMQLKFASVLMGAGSAIQLIAG  
IF  
PTTPLTAVAMSPWFSITLLLLIGTVYLFATTALNYFKQDSVGVWLLRCCWSRSIEYRYSTDAGGQHAEKLD  
LL  
TIQLSPQVHVKITRLESRYLGKGDYYSTAVQDGAGVQLLFPRAVRAQSVHFNIISSKRPWGVLVPEKID  
SP  
INESFLNRGQFRQAGQFGTLGNKAARNAHEDFTFPLMPHESEDLIWETWIPLEAEATYLELQIWYPDSLI  
KP  
DQQDIGYLYQLKLNREGDTKVDGLITAELEVKALNRSTALTLEVAE-----  
--  
-----  
--  
-----  
--  
-----  
--  
-----  
--  
-----  
--  
-----

>A0A0Q0B8F0\_PSESX/1-981  
MHTAGELPVSAQRISRMTDKHGTHQORRAALFPKTPATATSLCPFRGPNVAIVPVRYALDRSRYDAAPEQ  
LK  
PLLKQGWALMPTLKTRSYTLRQLYDGYVYVFDDETAGTLHEYVASANNHLSRIVWTDAQIGSDQRSGAS  
DG  
KPFLLYPRRSTLHIAFSPQWTVRVCEHMRSSAPSRALWMKALDLASYCITMAEPDTLPVNRIAEAVADI  
DK  
GYVTDDGRFADSAIPTARPLSEDAETHLLWAPLGADVFWQGSVDDQDSSLLIALDDPLAVFNDLGMQLAA  
DQ  
AAFRDQWARHEHKIQIAQTVSGLCGAESDPQKLPASVRGNAARTHQYLSEVEAYFEQCILEEAQISSNV  
PG  
DFLLL PDMFKSLDMRKSIEARYGSAPTEEAAQTWKDRHKWRREVDLSGARQYLQHLPSGDALLQVRDT  
QR  
DFQLWATYIGTDPFKLFIDTTRPTQLLYLQTIMLNLQIIYAQDSAATTWLAEQEANASTLFGTLRYGFSP  
AL  
KQALHEEADTLNGLGDVTNLATRIGELNGALNHQGFADKPMKALKQPVQGTFKALGELASGAGKATLE  
SI  
LLAWPIDSRMVLGKQONIVALLRLLIGQILLDSKARIAVDQVFTKQWIREWQVLNKQISDTRRRW  
LY  
PNAYNTRQSTARNLHHTKQKLRVHEL SIPALLDFQNNYAKLLQDEIRQYFQSGKTLAKDWLAQAKRWD

RL  
GGTAGSITWGVIMLNFINALT YRDVTRDGD FSAKDIGKVTYGLGYSFNLLMAVFVEAPWSVIRDATPEL  
ID  
GKNVAILDRSSAYWKT KGNATWGDAIRGFRVSMVAMGGFGIAAVVLELFDITDDFHEAKTSGEEYGIGIK  
GF  
SVLVMGLGSAAQLLAGIFPAGVFTIIAMNPWF SVALMATGFTYLIATMALNYFKQDSVGVWLRKCCWSRT  
LA  
YRYAETAEGEQEEVRALMEIQLSPQVHAKSTVHYEDRYLGSISFF-----  
--  
-----  
--  
-----  
--  
-----  
--  
-----  
--  
-----  
--  
-----  
--  
-----  
--  
-----  
--  
-----  
--  
-----  
-----

>A0A1Q9GWL9\_PHODP/1-894  
MRQLNIQAFRLRMKGHHAGMAKKLESSVADIGSVTQDIINGFAITSTPLNADDTESNSGFENKAKPANP  
AS  
TYQVTLPESNVSNGLFIALEDPLADITDIALKLGSLHAQKERVFGSDEDKHKQLISEFVRSIARVPYDLK  
TA  
PEALKTKLKDNPQEV LKFESVLNQLRYQSPLNQAQYGSEAYAANALS YEQRLEAQKILNNTYHYTPD  
KD  
FEHFESRKNIDLIDWNKMSTFLDKKYAKLKAIEGDATTMPAELNRAFKDLGIYAARVGVDIEDTQGQLY  
LN  
TLFGHLFPLMTAVSQWDAAEEDTL LALAPFYYSPELSKAINKAIPNDALSVTNVSDMTNMVSRLGESIS  
FI  
YDGRIPESDEATKALITRVIQAAKNAITTAGDHVWDGLMDGLFPHQVSGESGLD SGLRLMVARSLVSKEG  
KL  
LISSGYVSKFDSFNDKLNPLLQKAEQLSGQLYANGTTAMRNNLNEIKGKIAKLIADEMPLLIKFEQEAMN  
DA  
IRRKSAASIRGLRSRFTSTVGQAVDNVNGVGT VVGGFAAICNLWNLWAVSQQVTSKLNANSTQDQADV  
IE  
LASALSWTLSAFAGVGRDSQVIASKFVEMTVKRALAESASTVNQQVVIKRFVAAAKVTAIFGLFAAGTEI  
YL  
TRRQWLQSDDTFEQALLIGKMGLATQGLVSVFQLARLFGSTALLGGIVAAMVSTLFYAGIAYLLFSAL  
YN  
YYHRDEIQSWLLHCAWGKSPKPQTLEQELTALENIIWKPNIELTKNSVDIYLPSYLLNDEKKHFDLQIVV  
HE  
KINLIYVSMNSHNETLKSTQIDVSQARRKNTANGVGYISIPVPHNEGDEVI IAINYDRAWTEECQSYVG  
TR  
SSAGTFDLERTKDVVSKRHGVAGLTLPVAG-----  
--  
-----  
--  
-----  
-----

---  
-----  
---  
-----  
---  
-----  
---  
-----  
---  
-----  
---

>A0A0Q0E8H8\_PSEA0/1-1100  
FRGPNVAIVPVRYPALDRSRYDAAPEKLPKQGWTLMPILKTRSYTLRQLYDGYVYVFDETAGTLHEY  
VA  
SANNGHLSRIVWTDQAIGSDQRSGASDGKPFLLYPRRHTLHIAFSPQQWTRVCEHMRSSAPSRALWMKA  
LD  
LASYCITMAEPDTLPLNRIAEAVADIDKGYVTDDGRFADSAIPTARPLSEDAETNPLWAPLGADVFWQGS  
VD  
DQDSSLLIALDDPLAVFNDLGMQLAADQAAFRDWQARHEHKKIQAQTVSGLCGAESDPQKLPASVRGNAA  
RT  
HQYLSEVEAYFEQCILEEAQISSSNVPGDFLLLPMFKSLDMRKSIEARYGSVPTEEAAQTKDRHKWRR  
EV  
DLGSARQYLQQHLPSGDALLQQVRDTQRDFQLWATHIGTDPLKLFIDTTRPTQLLYLQTIMLNLQIIYAQ  
DS  
AATTWLAEQEANATTLFGSLRYGFSPALKQALHQEADALLNGLGDVTNLATRIGELNGALNHQGFADKPW  
MK  
ALKQPVQGTFKALGELASGAGKTTLESILLAWVPIDSRMALGKQQNIVALLRLLIGQILLGSTARIAVD  
QQ  
VFTKCLKQWTREWQVLNKQISDTRRRWLYPNAYNTRQSTARNLHAHKQKLRVHEL SIPALLDFQNEYAKL  
LQ  
DEIRQYFQSGKTLAKDWLAQAKRWDRLGGTAGSITWGVIMLNFINTALTYRDVTRDGDGFSKDIGKVTY  
GL  
GYSFKLLMAVFVEAPWSVIRDATPELIDGKNVAILDRSSAYWKTGNATWGDAIRGFRVSMVAMGGFGIA  
AA  
ALEVLDIQNDLTQAKTSEERIAMQVKFASVLMMGAGSAIQFIAGLFP SITITAVAMSPWFSLTLLLIGAV  
YL  
FATTALNYFKQDSIGWWLRCCWSKSIDSRYSTDAGGQHEERLALLTIQLSPQVHVKTTRIESRYLGKG  
DY  
YSTQVQDGAGVQILLPSAVRGQSVHFNIISSKRPWGVLPVEKIDSPVQPPFLERGFQKQAGQFGKLDNQA  
AR  
NAYEDFTFPLMPPEGEDLIWETWIPLLEEEATYLELQIWYSDSLIKFSQQDIGYLYQLELNSEGDTKVDGL  
AS  
AEPGVTLDRSSALILEIAE-----

---  
-----  
---  
-----  
---  
-----  
---  
-----  
---

>A0A1H3FGG7\_9GAMM/1-1116

MSDRQAQQDARDAEFDETPFGATGMCPLNLEIAIFPVRYAIDEASSEKENAQGPHPLAESWASHGYPELQ  
TR  
SYCLRQLRDGWL YVWDEVDRTFHEYRIEGHQFTRIPWPEDVTETQPDERQGGEESKPYLLYSCRSRLSIA  
YS  
PVQWTWRICEHMRSNADARRRFMRSRLSAAIEAPEDTPHVGPLTELGEHVADITPQGAVREFDSATVMA  
RP  
LSEEEQQDEGESAYVTLAFKPEIDQNTVLAKVPNQDEALFVALDDPLGIANDLTMQLLGVEMALEQFEDE  
HG  
HRLNTALMVQRLCGIDESDLPDAVRDDPEKQRRALLDQHYRLRRSDELSTAINRGSPFDSAIRPNANA  
DS  
RQAQLEAYEAELAELGIDPRDDDDLQEWNAKAIWRNDVDYD GALHFIQERQPELEHLQAQCRHSREDLTA  
WL  
DRLPTSAQALCFDGCNVLQTRALIEFTRMVSEALGASEEGQWLIERARRRDNLVGLALFNFSPELEQAL  
TA  
VAKNFIETGEAEGPSVSDATSVASRANEIKGVLDLDGVRDSRAFKALAPHVQESLDTLITAVQGP AKLAW  
EG  
LAYQLLPAVGAGATVTTERLGQGLSQTMQAAFVHPDNAARNTQLVRDGGYESRHRRWRRDVRRQSLLRG  
LR  
EALKRPAAPHDRAAQIRNLNAEQQAIDELMTREPKRIVARQGGSSGGPAETLGYDELREQNRLKLEQGAA  
AA  
QARMRGWMNRFGGGLPLL VAGLNLN VGTTLATIERDGM DENAKQSLISGMGYTTNAVMALWMPYWNKH  
AL  
SQAAKIEGVTTKLAKAGVRQWSGAGQAAFARTAAKLTTRVAGMAVFGTIAGVVEAWQISGQISAATSNEE  
RV  
ALETKRLSTSMATVSGLQLIGALMGR LVPFAWIMAPWAAWTLAIAGVVYLFASFFVDYHREGVRLWLY  
RS  
GWGKSPRWADDDEGQATEWRALLEALYQPTVRLEPVTSLGYQGRRAAQVHQGFWLKIALPSMLAGETIKL  
SR  
NASRGFWAPASSLEERADRS GGTLPAPTDYDPKEPRIWQAWLPTDEQAAGAPFTLSIDYPETTLRSPHSA  
DY  
VFHKPQADEGSFDLEPGDNTAVCQPIGRLFSLTPN-----  
--  
-----  
--  
-----  
--  
-----  
--  
-----  
--  
-----

>A0A2S3TBL4\_9PSED/1-874

MTDKNGTHQQRRAALFPKTPATATSLCPFRGNIAIVPVRYALDRSRYDADPRQLKPLPKDGQWARLPKL  
KT  
RSYTLRQLYDGYVYVDFETAGTLHEYAASATNGHLSRIVWTD A HIGNDQRNGAGEGQPFLLYPRDNRLHI  
AF  
SPMQWTWRMCEHMRSHAPSRALWMKALDLASYCLTMAEPDTLPLDRIAEAVADIDNDRVDDGRFADSSI  
PT  
ACPPSEGAEPDPLWAPLGADVFWQGSVYDQDSSLVIALNDPLAVFNDVGMQLAADQAAFREWQSVHEHKI  
QI  
AQT VATLCGAESEPEKLPASVHG DALRTHQYLSEVEAYFEQCILEEAQISSSNVPGDFLLLPDMFKSLDM

RK  
SIETRYGSAPTEQAAQAWKDRHKWRREVDLGSARQYLQHLPTGDALLQVVRTQSDFLWATHIGTDPL  
KL  
FIDTTRPTQLLYLQTIMLNLQIIYAQDSAATNWLAEQEANASTLFGTLRYGFSAAKQALHQEADALLNG  
LG  
DVTNLATRIGELNGVLNHQGFADKPWMKALKQPVDQTFKALGELASGAGKATFESVLLAWVPIDSRMAG  
KQ  
QNIVALLRLLIGQILLGSTARVAINEQAVTKLKQWVREWRVLNKQISELVRSWQYPNAYNTRQSTARNL  
QA  
HKHKLRVHELIPALLDFQNEYAKLLQDEIRQYFQSGKTLAKDWLARAQGWTDRLGGTAGSITWGVVML  
NL  
INTAFLYRDLTRDGFSTKDIGKVTYGLGYSFNLLMAVFVEAPWAIISTAKPLVIGGYDVGILDKSAAYW  
KA  
RGNVWGD AIRGFRGSMVAMGGFGLAAVMLELFDVADDFYAAKTSEEEYGLRVKWSSVLMMGLGSAAQLF  
GG  
FFPASVPSQN-----

---  
-----  
---  
-----  
---  
-----  
---  
-----  
---  
-----  
---  
-----  
---  
-----  
---  
-----

>A0A2K4WH10\_9PSED/1-874  
MTDKNGTHQORRAALFPKTPATATSLCPRFGPNIAIVPVRYALDRSRYDADPRQLKPLPKDGQWARLPKL  
KT  
RSYTLRQLYDGYVYVFDDETAGTLHEYAASATNGHLSRIVWTDHIGNDQRNGAGEGQPFLLYPRDNRLHI  
AF  
SPMQWTWRMCEHMRSHAPSRALWMKALDLASYCLTMAEPDTLPLDRIAEAVADIDNDRVDDGRFADSSI  
PT  
ACPPSEGAEPDPLWAPLGADVFWQGSVYDQDSSLVIALNDPLAVFNDVGMQLAADQAAFREWQSVHEHKI  
QI  
AQTVALTCGAESEPEKLPASVHG DALRTHQYLSEVEAYFEQCILEEAQISSSNVPGDFLLLPDMFKSLDM  
RK  
SIETRYGSAPTEQAAQAWKDRHKWRREVDLGSARQYLQHLPTGDALLQVVRTQSDFLWATHIGTDPL  
KL  
FIDTTRPTQLLYLQTIMLNLQIIYAQDSAATNWLAEQEANASTLFGTLRYGFSAAKQALHQEADALLNG  
LG  
DVTNLATRIGELNGVLNHQGFADKPWMKALKQPVDQTFKALGELASGAGKATFESVLLAWVPIDSRMAG  
KQ  
QNIVALLRLLIGQILLGSTARVAINEQAVTKLKQWVREWRVLNKQISELVRSWQYPNAYNTRQSTARNL  
QA  
HKHKLRVHELIPALLDFQNEYAKLLQDEIRQYFQSGKTLAKDWLARAQGWTDRLGGTAGSITWGVVML

NL  
INTAFLYRDLTRDGFSTKDIGKVTYGLGYSFNLLMAVFVEAPWAIISTAKPLVIGGYDVGILDKSAAYW  
KA  
RGNVWGDVIRGFRGSMVAMGGFGLAAVMLELFDVADDFYAAKTSEEEYGLRVKWSSVLMGLGSAQLF  
GG  
FFPASVLSQK-----  
---  
-----  
---  
-----  
---  
-----  
---  
-----  
---  
-----  
---  
-----  
---  
-----  
---

>A0A1E5CW3\_9VIBR/1-1079  
MSDSADAQAKKQPSERVGSVVGICPLKTESIEIVPIRYAIDEYAEDKKQPNPLPAYWRGSPFFSDDIKEN  
SF  
TLRQLRDGWLIVCKEDGTPANQFHEYQVSGANLIKVDLWVCDGPRDQRGSAGKTSTVLTYNKRDTLWLAFL  
SK  
NRWSGRVCEHMRSNSSSRYKWMRRLNLASYCHSLSARHVGALTDLAQAVSDIDVSAVQDNRFAGMASNTS  
KD  
SDVDNEFKPVASENSYISQCQDIENAI FIALDDVIADLTNITTHLACIVSENRFQEEEEGNKIFLAQQVL  
DL  
TLAKASDDFVYPVGVNTEAVKRNYEYKVTLEFDLKEEVLNTNKRKYGYTDEKAIKKLTEEIKKTYGAEP  
KG  
DLVAWYRRKKYREVVDWKWAQKEYDDLTKSEKRIEIHQAANDLIASLARLDTNPMACFLDNQCAEDQI  
YL  
QSIFANIVEVITQNISEKHAKWLLKDFESPNTLLALSLSGYSMELHKAIGE QFIDPETNSWIQASDMSNV  
LA  
RRNDLMSFITHSEIENSILFQGVSKSVQKVALAFNHAISSSTVSSGSVKLISIMIAGLSPSMINSNGVPNA  
GF  
TFRSFFAQRYATQVKLTVTAQPEYQHQLKGWQQERAFEFEEVATNRAINNGIKRGLSELDMIGLEQKYH  
IA  
VDKYHQVSAASPFAIAVDNPQMMVAVRQNI AEVITNKGKVLSGSAWDFAGGFAGIVAILNVWSMSEAIN  
IA  
HNNNPSSSEYQYLAQTAGYSAAAFVAIFQGKAWGKISYDASVMSMRVSYWKTATPTSSISMGMKQSRSF  
IR  
YTTFAAGFGVVAGFFESKALSNEQEQAIGFDKYLLFSKKIAVFAMMGANIGQLVVRIAPQFLNWGIGAF  
AP  
WIVSTLLVAGFAYLLITMIQNSLYKDEFQQLKTPWGNKQDLNITSESMADSLLELKSIMLKPSLYIVS  
RP  
KYEATGHLNWEGYPEIKQSKQIQLAVSKLYEQAISLTLDGQYMAKERLAGHWQAVNSPFADCETGN  
AN  
IRIYTLTLTVPIQRKTIKMNVNFDGMDYCFVVKVSSSGYVTNPVVSQTRSADIIDDVLARTHLPLHVGIN

R-

-----  
--  
-----  
--  
-----  
--  
-----  
--

>A0A399PQF9\_9PSED/1-1125  
MADKSGTLQQQRNASFPATPANATGVCPLNGPDVAIIPMRYALDRSRYDEHPKCLKPLLKTGTWSSLPVL  
KT  
RSYTLRQLRNGYVYVDFDETEKTLHEYKYQADTAMLTRIKWEADILGKDERSSSGASKTHLLYPRKNTIRI  
AY  
STLQSWRICEFIRSNGGSRKDWMQKLDLKEYCLTMKSAHTLPLTQIVDAVADIDKGTVTRDKRFSDSAY  
PP  
DGSSADKGNLVPLASDVVWTGVSVPASAMVIALDDPLAMLEDLNWQLIGDQAAYIEWQDEHQHKVGIAE  
IV  
DNLGANGDKSLLPTSIAGNDEKKRQYTSDIEDYFSQLKLEDQLYNGNDTILIPPNLPSLEMAADLKKKY  
GS  
IPSQALKESWEARTKWRNQVDLTSARNYISKKNKNGTRLISKVNDTQKDLINLAQYIGAEPRLRFIDTTR  
PE  
PHLYLATIISEVLKTLGQDQAICEWLTQDIKASTLLGLARFGFSLEIQSALTNEANKLVQGTGDITAI  
SR  
IGELNSFITHDAIADKAWMKGLTDPAKLTLKTITILAKERGKAVFEQTLALLPVDSRLARSKQONLPA  
LR  
NILVGHILANHKDRLEFDKSGNDRLSKWKNRFILAQVSLDNHLKQWHIPRAAHDVSLGRNLIKLNQNDVQ  
LS  
THELPALLDYQNNKYAQILGDEIRNTLKRGGLAANQWQQRKAWSAKYGIDAAAITWGVAIANLFNTAVT  
YN  
TVSKDGEISEKDRAKIFSSFSYTANALMAIFIETKWSSMKGLNITVGTKTINIADRSKAWELTKSAKNW  
GK  
IIRGFSWRLVGLGGTSLLATGFYWDIQDDLKTTSNKDERAALIAKQGAVITMSLIGAVQLLAGVTGLLG  
GS  
NLVAFAMNPWFAVAALIAGIVYLIATAALNYFKRDAIGQWLHKCTWSRTASERINDQNEENRSLLEIQMS  
PT  
IFVKPTFISQIQYGPQMIPHESKKQDGAWIQMHFPAELRGNVVRTNLAASHRPFYIGPVTKLDDQLQAPF  
LN  
NGQSVEATTFRSPPIRPLANASLGAIPPRPREGTSLVWQTVWPLTTDAQNVEIQIWYPIEILASGEGDR  
GY  
RYQLELDKEGVEDQKDSRISSLDNSTLVVQQLGGRNDAAVLPLLN-----

-----  
--  
-----  
--  
-----  
--  
-----  
--

>A0A0W0PRR1\_PSEF/1-1124

MTDKNGTHQORRAALFPKTPATATSLCPFRGNIAIVPVRYALDRSRYDVNPTQLKPLPKDGQWARLPTL  
KT  
RSYTLRQLYDGYVYVFNETAGTLHEYAASASDGHLSTRILWTDHIGNDQRNGAGEGQPFLLYPRGHRHLHI  
AF  
SALQWTWRICEHMRSHAPSRALWMKALDLASYCLTMAEPDTLPLDRIAEAVADIDKDRVDDGRFADSAI  
PT  
ARPPLEGAEPDPLWAPLGADVFWQGSVYDKDSSLVIALDDTLAVFNDLGMQLAADQAAFREWQSAHEHKI  
QI  
AQT VATLCGAESEPEKLPASVRGDALRMHQYLSEVEAYFEQCFEDAQIGSNTVPGLLLLLPDVFKSPDM  
RR  
AIQARYGSAPTDEAAQAWKDRHKWRREVDLSGARQYLLQHLPTGDKRLQQRVDTQSDFLWATHIGTDPL  
KL  
FIDTTRPTQLLYLQTIMLNLQIIYAQDSAANAWLAEQEALRYGFSPALKQALHQEADALLNGLGDVTNLA  
TR  
IGELNGVLNHQGFAGKPWMKALKQPVDTFKALGELASGSGKTFESVLLAWVPIDSRMALGKQONIVAL  
LR  
TLIGQILLGSTARVAINEQTVAKLKQWVREWRVLNKQISELVRWQYPNAYNTRQSTARNLQAHKHKLR  
VH  
ELSIPALLDFQNEYGKLLQDEIRQYFQSGKTQAKDWLARAkwTDRLGGTAGSITWGVMLNLINTAFL  
YR  
DLTRDGFSTKDIGKVTYGLGYSFNLLMAVFVEAPWSVIRDATPVLIDGKNVAILDRSSAYWKAKGNAAW  
GD  
AIRGFRVSMVAMGGFGLAAVTLELFDITDDYYAAKTSEEKSSITVKGISVFALGVGSTFQLISGLSPASA  
FT  
IVAMSPWFSVALLVIGSIYLFITMALNYFKQDSVWLRKCCWSRTLDRYRYAETAEGEHEEVRALMEIQL  
SP  
QVHVKSTVHYENRYLGKGDYYSVAVQNGAGVQVRVNLVRGQSVHFNIISSKRPWGLPIEKIDQPIHEA  
FL  
DRGQFRKAEQFGTLTNKPAGKASEDFTYPLMPENEDLIWETWVPLDKDATYLELQIWYPANLLNPGEDD  
RS  
YLFQMELGTRGDTAIEGLAAVELEVKASSRIGALTLEVAEGTPV-----  
--  
-----  
--  
-----  
--  
-----  
--  
-----  
--  
-----

>A0A0P9KGC3\_PSEA0/1-1147

MMNTVKKSVTGMPRMTDKHGTHQORRAALFPKTPATAISLCPFRGNVAIVPVRYALDRSRYDAAPEQL  
KP  
LPKQGWALMPTLKTRSYTLRQLYDGYVYVFDETAGTLHEYVASANNGHLSRIVWTDQIGSDQRSGASD  
GK  
PFLLYPRRNTLHIAFSPQQTWRVCEHMRSSASSRALWMKVLDLACYCITMAELDTLPLNRIAEAVADID  
KG  
HVTDDGRFADSAIPTARPLAEDAETNPLWTPGADVFWQGSVDDQDSSLIALDDPLAVFNDLGMQLAAD  
QA  
AFREWQSAHEHKIQIAQTVSGLCGAESDPQKLPASVRGNAATHQYLSEVEAYFEQCILEEAQISSSNVP

GD  
FLLLPDMFKSLDMRKSIEARYGNVPTTEAAQTWKDRHKWRREVDLASARQYLQQHLPDPSGDALLQQVRDQ  
RD  
FQLWATHIGTEPFKLFIDTTRPTQLLYLQTIMLNLQIIYAQDSAATTWLAEQEANASTLFGTLRYGFSPA  
LK  
QALHQEADALLNGLGDVTNLATRIGELNGALNHQGFADKPWMKALKQPVQGTFKALGELASGAGKTTLES  
IL  
LAWVPIDSRMALGKQONIVALLRLLIGQILLDSKAPIAVDQOVFTKLKQWIREWQVLNKQISDTRRRWL  
YP  
NAYNTRQSTARNLHAHKQKLRVHELIPALLDFQNNYAKLLQDEIRQYFQSGKTLAKDWLAQAKRWTDR  
LG  
GTAGSITWGVIMLNFINTALTYRDVTRDGFSAKDIGKVTYGLGYSFNLLMAVFIAPWSVIRDATPVL  
IDG  
KNVGVLDRSSAYWKAKGNATWSDAIRGFRVSMVAMGGFGVAAVTLELFDITDDFYAAKTPEEKNTIIVK  
IY  
IFAMGVGSTFQFMAGLSPASTFTIVAMSPWFSVALLVIGSIYLFITMALSIFKQDSVGVWLRKCCWSR  
LDY  
RYSETVKGESEEVRLMEIQLSPQVYVKSTVHYENRYLGKGDHYSVAVQNGAGVQVRLPNLVRGQSVH  
FNI  
SSKRPWGVLPVEKIGDPLHEAFLAHGQFRKAEQFGTLTNKPAGKASEDFTYPLMPENEDLIWETWV  
PLDKD  
ATYLELQIWYPSNLIHPGEEDQGYLFQMELGTRGDTAIDGLAAVELEVKTSSSVGTLTLEVAEGTPV  
----  
-----  
-----  
-----  
-----  
-----  
-----  
-----

>A0A1I3FXP2\_9PSED/1-1140  
MTDSNRQAAKDSLRAFNPSSAVSTGQCPMQGEVAIFPVRYAIDESPCKAGQPGPNSLPAGWQGLSEMP  
RL  
HTRTYTLRQLRDGWVYVFDRTAKTFHEYRLIGCQFTRIKWADKQLNQDTRTGSGETKPYLLYPKTSSLL  
IAY  
SVAQWTWRTCERMRSTPKLQSQWMRELDLPRYCQSLKAPHTAPLSRLAELVADIDPGAASARASFTSS  
ILPT  
LAQAEGQECKPIIGSDQIIGSVPDKDTALMLALQDPLAAVDDLAMQLTGRHIEQHLFEKEHHHRLEV  
AGNIE  
MFAGLPLDPFNESDWPRGALKDEAKRQVFIRDAQKYLDSYMAVKPSFPVFDPAVSAARSTALGMEGR  
DLDK  
KYGAGTATKLEKKAQLWISRAPLRDQVKYQEALDYRRDRHRELVVLMRHIDSARNDLIPWLEYIKTD  
PGKVF  
LDPCAEQQSALLIRTAQGLFDVFGQTEAGKNWLCQEYAQPKTLLGLALYNFDAELAHTLEAIATNFA  
ASGSL  
DPGLATSAVTRANETYSLLTDDSVRNSKLFQAMSLPARQAYDTLQKVARVVAHDTWQLLVYKLLPAL  
STKFA  
PTWKPIAYSLVMVTHIDTEVVKPYVVYDHGYPAKKQWDKFAQLAKKIKGQTRTATFGAKHEKAAAN  
RQL  
VQLYEGRQLLMANEPNRILAKGEVRVQQRITLIQQQVEFLHTLGKSELVEQLELKRRNYSAYLGR  
LKKWM

AS  
GLGNGLAALVAALNIWNFKNSMDQARADGHSQDDLKSLSSAGAQLGNVVMALTLMPRWAAMSKLSVVAY  
LE  
GNPVTTKFTQASIQSWAVANAELATMVRSFALRAVGMATLGVIANGVDAWQLHSAAGNASGSDEALALRT  
KG  
IAAIAMAGLSFAQLGYGLAGAFGFKAIGLVFASWILWGFFIAGVIYLAATFIANNLKREGLKLWLWRCW  
TQ  
DKAPYWANTSQGRQDELKALHEVLMRPTLCAKTVTGNYGASSVCLQIALPADLEGKRVRLHPIMVEEGLL  
WM  
PDKQTYRAGMYGSYIAEGEWPTSALGNFERKASAFVPYNEGEARVWQVSLPHSKGMDRLELEILYPED  
VV  
SRQDGRGYRFSIELDDIAEGKLQENPFESHICEPVDQDSLMLVEKVPENQRVYFNLSVI-----  
--  
-----  
--  
-----  
--  
-----  
--  
-----  
--  
-----

>F9R7Y6\_VIBSN/1-1137

MSDENASASQQPSTEVGSIAGQCPMAMGIDIIPVRYAIDESLEDGSGRFGLPEKWQNGIYADDLTRSN  
YT  
LRQLRDGWL YVISDHDKTFHEYEVCQTQLKKYNLDSWEKEQGKAERGEAGENKPFLTYNQENTLYIAWSK  
QR  
WTWRLFNYVLTNKSCKQWMRKVDLSKHCQTLNEPHMGLATDIAEAVSDISHTDSSEAYFTGTSVPTTLA  
ED  
GDAANTEIKPIAQYGAITNGIKKGAIFVALDDPLVDLQDLSLILGEKVLDHADLQEKNSHKWALLET  
QV  
TALSQPEGLNYPDTVKTEEEKQYYQDLTPYMEYKRQAENALKQGGNFGAGRGYLDVQQAEMAKNVLFDK  
YG  
KHDIDNAALLERWSATQKWREEVDAKKIYQAIDDFNANEKPVLEALVDTLNI FRDQLVAATQRFGWEPEK  
GF  
VDIEEQGQDYLSEVHFFINEVVTKVLDEKTTAWIEKEFESPTLLPLYLSGYSKALYEKIGDELIPAES  
DY  
VSFNDTGNFTSRINEMNAFLGTEEVQDSRIYAALSKPLQQVMKAFQASISEMVDGGVSIIARKSAALAVM  
FP  
KMHFIDRTTVVERIAIDKKITLQEDFLNQRRNMAERQRVAKELNQAYHEFNANKLASHIDIVGYDSQSA  
KQ  
NIAAQSDALEREIDALSQKQSFDELHQAEAEYKNNATPETAARYQKALNQMGELYYGMPMYLLAEQDI  
AK  
EFRTNIKQQMARGLKVTASTYNSLGGLGFMVFLNNAKDLYTGYGDLQKNSVTTSREKAELAQQFFYS  
LNA  
LG  
SIFQSKAWAKVDKGTARFLRQSIQDASAQQAGRVAKFVNLTRVTATLGAIAVGIELFYVLDDYSKAESKE  
EK  
FCLGVKAASLFGMGTTFILQRAAIALGSR LAMSVLLAIASPVVALIIGGVYLISLVLNSLKKDDYQKWL  
SR  
LPWSADNDSTKFTDTPEGVAEALLALYQFTMQPKLSAQLMVERVENKISSYPAAIATTTGFKLIVDLP  
GT  
LN  
QVGNIVKVGINSPECTNLNPATVVWSQMGDALRYEHNQTLNKKTSLAFDIEVSFYMQPEKSSHLHKKITYH

YT  
FSGGQLSDIQLTPIQPLTADEVNTKSQTQVYDPSYYTDRKAIWAGADTPWSNYALLI-----  
--  
-----  
--  
-----  
--  
-----  
--  
-----

>J2XII6\_9PSED/1-1126  
MADKSGTLQQQRNACFPSTTAKATGGCPLTGPDVAIVPMRYALDRSRYDEDPKKLKPLLKSGKWTSLPVL  
KT  
RSYTLRQLYKGYVYVYDETEKTLHEYSYSTSTGQLTRIKWTDADIGKDERSESGECKNHLLYPRKNTLHI  
AY  
SPNQWTRICEHVRSNPRSRKEWMKVLNLPKYCITQSAKDTLPLSSIADAAADVDDKDAVQLDKRLADSAI  
PP  
TASAGSIGEPVFNLSAADVFWAGEVPDKDSALIIALDAPLYILNDLGMQLAADHAAYQRWQEQHEHRIKV  
AQ  
TVEALCGSSLAKEKMPSEIKDDIGKTRQYQRELDSSYTTQRETEEDLAIASASGSAPLIVPSQRFKAIQM  
RK  
ALESKYSITLSEADYVAWKSREKWRRHVDLDGAHAYLQNHAKAGEILLQQTIIETQADFETWAKHMGVDPE  
KL  
FCDTANEGQLLDLQNTFANLLGIYCQNDSSSKWLAKEEVTSTSLFGSVRFGFSEQLKAAFGEPSNKLLDG  
IG  
DYTNLATRAGEINSLVNHEEFHQWPKLEKSIQDTYENIRTLSDIKGKKTANAIILSLLPSDSRLASG  
KT  
QNLAALLRNMLIGQVLTNSPERIVVDAQIKEKIDIWKSEKRNLTKELDSSRKQWKISKRNNGRRGQGRKI  
KA  
LEASINLHELKPKVILDFQNNKYAELLRDDIRKFAISKANATTAWASKAKSIAQRGGVNSASITWGVIIIL  
NI  
INTANTYHQAAKDGVIDRTDLIKTTYSAGYSANLIAAVFVESKWSSLKGLSTINGSSTGIMEQSAAFWS  
ST  
QGETQLWGNAIKRSRRLAAMGGLAIFSTALELWDIKDDYATANSSAEKAALWAKGLAVAGMGVGGALQL  
IA  
VTLFRSWTVVVMGAWFAFGMLVMGTIYLLATVALNYFKNDAIGIWLSKCSWAKTRSNSALGSPAEEH  
RS  
LLEIQLSPQIHVQSTIEYRREYVPKIGSRMVPFQTGAWVQWRLPSALRGKTVEFNITGSKSRLNILPVTR  
TD  
DPVQDPFLDKGVLLGDDHFEKIGNSSPSQVAEKFDSEKVDPGKDFIWQAWVPLGENTDYLEFQIWYPLLI  
IS  
GSDDRGYLYQVEISTDGSTEADGLSKKNLQVKSASRNESLVLVLD-----  
--  
-----  
--  
-----  
--  
-----  
--  
-----

>A0A2K4WSK3\_PSESX/1-1132

MTDKHGTHQORRAALFPKTPATATSLCPFRGPNVAIVPVRYALDRSRYDAAPEKLPKQKWTLMPIIL  
KT  
RSYTLRQLYDGYVYVDFETAGTLHEYVASANNGHLSRIVWTDAQIGSDQRSGASDGKPFLLYPRRSTLHI  
AF  
SPQQWTWRVCEHMRSSAPSRALWMKALDLASYCITMAEPDTLPVNRIAEAVADIDKGYVTDDGRFADSAI  
PT  
ARPLSEDAETHPLWAPLGADVFWQGSVDDQDSSLLIALDDTLAVFNDLGMQLAADQAAFRDWQARHEHKI  
QI  
AQTVSGLCGAESDPQKLPASVRGNAARTHQYLSEVEAYFEQCILEEAQISSSNVPGDFLLLPDMFKSLDM  
RK  
SIEARYGSVPTEEAQAQAWKDRHKWRREVDLSGARQYLQHLPSGDALLQQVRDTQRDFQLWATHIGTDPL  
KL  
FIDTTRPTQLLYLQTIMLNLQIIYAQDSAATTWLAEQEANASTLFGTLRYGFSPALKQALHQEADALLNG  
LG  
DVTNLATRIGELNGALNHQGFADKPWMKALKQPVQGTFKALGELASGAGKTTLESILLAWVPIDSRMAG  
KQ  
QNIWALLRLLIGQMLLGSKARIAVDQVFTKLKQWIREWQVFNKQISDTRRSWLYPTAYNTRKSNASHL  
RV  
LEEKRLHELHLSIPALLDYQNNQYAKQLQDEIRLHFQSGKTMADWLTAKRWIDGLGGIAGSITWGVIML  
NF  
INTALTYRDLTRDGDFSAKDIGRVTYGLGYSFNLLMAVFVEAPWAVISTAKPVVIGTYTVGILDQSAAYW  
KA  
RGNVWGDPAIRGFRSSMVAMGAFGIAAATLELKDILEDFTARTIEEKTAISVKGTSVFMGAGSTIQLA  
AG  
ISPTAKITAVAMSSWLNVALLVAGFIYLFATMALNYLKQDSVGVWLRKCCWSKNLDYRYAETAHGENEEI  
QA  
LLEIRLSPQVYVKSTVHYEERYLGKGDYSSAAVQNGAGVQVRLPNLVRGQSVHFNIIVSSKRPWGVLPVEK  
ID  
QPIHDAFLDRGQFRKSEQFGTLTNKPAYKASEDFTYPLMPHEDEDLIWETWVPLDKDATYLELQIWYPSN  
LI  
HPGEEDRGYLFQIELGTRGDTSDGLTAVKLEVKALSRTGTLTLEVAESRPL-----  
--  
-----  
--  
-----  
--  
-----  
--  
-----  
--  
-----

>A0A3M3TBR4\_PSEA0/1-1148

MHTAGELPVSAQRISRMTDKHGTHQORRAALFPKTPATATSLCPFRGPNVAIVPVRYALDRSRYDAAPEK  
LK  
PLPKQKWTLMPIILKTRSYTLRQLYDGYVYVDFETAGTLHEYVASANNGHLSRIVWTDAQIGSDQRSGAS  
DG  
KPFLLYPRRSTLHIAFSPQQWTWRVCEHMRSSAPSRALWMKALDLASYCITMAEPDTLPVNRIAEAVADI  
DK  
GYVTDDGRFADSAIPTARPLSEDAETHPLWAPLGADVFWQGSVDDQDSSLLIALDDTLAVFNDLGMQLAA  
DQ  
AAFRDWQARHEHKIQIAQTVSGLCGAESDPQKLPASVRGNAARTHQYLSEVEAYFEQCILEEAQISSSNV

PG  
DFLLL PDMFKSLDMRKSIEARYGSPTEEEAAQAWKDRHKWRREVDLSGARQYLQQHLPSGDALLQQVRDT  
QR  
DFQLWATHIGTDPLKLFIDTTRPTQLLYLQTIMLNLQIIYAQDSAATTWLAEQEANASTLFGTLRYGFSP  
AL  
KQALHQEADALLNGLGDVTNLATRIGELNGALNHQGFADKPWMKALKQPVQGTFKALGELASGAGKTTL  
SI  
LLAWVPIDSRMALGKQONIVALLRLLIGQMLLGSKARIAVDQQVFTKLKQWIREWQVFNKQISDTRRSW  
LY  
PTAYNTRKSNASHLRVLEEKLRRLHEL SIPALLDYQNNQYAKQLQDEIRLHFQSGKTMAKDWLTTAKRWID  
GL  
GGIAGSITWGVIMLNFINTALTYRDLTRDGFSAKDIGRVTYGLGYSFNLLMAVFVEAPWAVISTAKPVV  
IG  
TYTVGILDQSAAYWKARGNAVWGDAIRGFRSSMVAMGAFGIAAATLELKDILEDFTARTIEEKTAISVK  
GT  
SVFVMGAGSTIQLAAGISPTAKITAVAMSSWLNVALLVAGFIYLFATMALNYLKQDSVGGWLRKCCWSKN  
LD  
YRYAETAHGENEEIQALLEIRLSPQVYVKSTVHYEERYLGKGDYSSAAVQNGAGVQVRLPNLVRGQSVHF  
NI  
VSSKRPWGVLPVEKIDQPIHDAFLDRGQFRKSEQFGTLTNKPAYKASEDFTYPLMPHEDEDLIWETWVPL  
DK  
DATYLELQIWYPSNLIHPGEEDRGYLFQIELGTRGDTSDGLTAVKLEVKALSRTGTLTLEVAESRPL--  
--  
-----  
--  
-----  
--  
-----  
--  
-----  
--  
-----

>A0A3M4SEX7\_PSEA0/1-1010  
MHTAGELPVSAQRISRMTDKHGTHQORRAALFPKTPATATSLCPFRGNVAIVPVRYALDRSRYDAAPEK  
LK  
PLPKQGKWTLMPIKTRSYTLRQLYDGYVYVFDETAGTLHEYVASANNHLSRIVWTDAQIGSDQRSGAS  
DG  
KPFLLYPRRSTLHIAFSPQQTWRVCEHMRSSAPSRALWMKALDLASYCITMAEPDTLPVNRIAEAVADI  
DK  
GYVTDGGRFADSAIPTARPLSEDAETNPLWAPLGADVFWQGSVDDQDSSLLIALDDTLAVFNDLGMQLAA  
DQ  
AAFRDWQARHEHKIQIAQTVSGLCGAESDPQKLPASVRGTAARTHQYLSEVEAYFEQCILEEAQIISSNV  
PG  
DFLLL PDMFKSLDMRKSIEARYGSPTEEEAAQAWKDRHKWRREVDLSGARQYLQQHLPSGDALLQQVRDT  
QR  
DFQLWATHIGTDPLKLFIDTTRPTQLLYLQTIMLNLQIIYAQDSAATTWLAEQEANASTLFGTLRYGFSP  
AL  
KQALHQEADALLNGLGDVTNLATRIGELNGALNHQGFADKPWMKALKQPVQGTFKALGELASGAGKTTL  
SI  
LLAWVPIDSRMALGKQONIVALLRLLIGQMLLGSKARIAVDQQVFTKLKQWIREWQVFNKQISDTRRRW  
LY  
PTAYNTRKSNASHLRVLEEKLRRLHEL SIPALLDYQNNQYAKQLQDEIRLHFQSGKTMAKDWLTTAKRWID

GL  
GGIAGSITWGVIMLNFINTALTYRDLTRDGD~~FS~~AKDIGKVTYGLGYSFNLLMAVFVEAPWAVISTAKPVV  
IG  
TYTVGILDQSAAYWKARGNAVWGDAIRGFRSSMVAMGAFGIAAATLELKDILED~~FG~~TARTIEEKTAISVK  
GT  
SVFVMGAGSTIQLAAGISPTAKITAVAMSSWLN~~V~~ALLVAGFIYLFATMALNYLKQDSVGVWLRKCCWSKN  
LD  
YRYAETAHGENEEIQALLEIRLSPQVYVKSTVHYEERYLGKGDYSSAAVQNGAGGTSALAQS~~G~~TRAVRAF  
QH  
CQ-----  
--  
-----  
--  
-----  
--  
-----  
--  
-----  
--  
-----  
--  
-----  
--  
-----  
--  
-----  
--  
-----  
-----

>A0A3M4AB07\_PSEA0/1-1148  
MHTAGELPVSAQRISRMTDKHGTHQORRAALFPKTPATAISLCPFRGPNVAIVPVRYALDRSRYDAAPEK  
LK  
PLPKQGKWTLMPI~~L~~KTRS~~Y~~TLRQLYDGYVYV~~F~~DETAGTLHEYVASANNGHLSRIVWTDAQIGSDQ~~R~~SGAS  
DG  
KPFLLYPRRSTLHIAFSPQQTWRVCEHMRSSAPSRALWMKALDLASYCITMAEPDTLPVNRIAEAVADI  
DK  
GYVTDDGRFADSAIPTARPLSEDAETHPLWAPLGADVFWQGSVDDQDSSLLIALDDTLAVFNDLGMQLAA  
DQ  
AAFRDQWARHEH~~K~~IQIAQTVSGLCGAESDPQKLPASVRGNAARTHQYLSEVEAYFEQCILEEAQISSNV  
PG  
DFLLL~~P~~DMFKSLDMRKSIEARYGSPTEEAAQAWKDRHKWRREVDLSGARQYLQQHLP~~S~~GDALLQQVRDT  
QR  
DFQLWATHIGTDPLKLFIDTTRPTQLLYLQTIMLNLQIIYAQDSAATTWLAEQEANASTLFGTLRYGFSP  
AL  
KQALHQEADALLNGLGDVTNLATRIGELNGALNHQGFADKPWMKALKQPVQGT~~F~~KALGELASGAGKT~~T~~LE  
SI  
LLAWVPIDSRMALGKQQNIVALLR~~T~~LLIGQMLL~~G~~SKARIAVDQQVFTK~~L~~KQWIREWQVFNKQISDTRRSW  
LY  
PTAYNTRKSNASHLRVLEEKLRLHEL~~S~~IPALLDYQNNQYAKQLQDEIRLHFQSGKTM~~A~~KDWLTTAKRWID  
GL  
GGIAGSITWGVIMLNFINTALTYRDLTRDGD~~FS~~AKDIGRVTYGLGYSFNLLMAVFVEAPWAVISTAKPVV  
IG  
TYTVGILDQSAAYWKARGNAVWGDAIRGFRSSMVAMGAFGIAAATLELKDILED~~FG~~TARTIEEKTAISVK  
GT  
SVFVMGAGSTIQLAAGISPTAKITAVAMSSWLN~~V~~ALLVAGFIYLFATMALNYLKQDSVGVWLRKCCWSKN  
LD  
YRYAETAHGENEEIQALLEIRLSPQVYVKSTVHYEERYLGKGDYSSAAVQNGAGVQVRLPNLVRGQSVHF  
NI  
VSSKRPWGVLPVEKIDQPIHDAFLDRGQFRKSEQFGTLTNKPAYKASEDFTYPLMPHEDEDLIWETWVPL

DK  
DATYLELQIWYPSNLIHPGEEDRGYLFQIELGTRGDTSDGLTAVKLEVKALSRTGTLTLEVAESRPL---

-----  
-----  
-----  
-----  
-----

>A0A0P9RND1\_PSEA0/1-1132  
MTDKHGTHQORRAALFPKTPATATSLCPRGPNVAIVPVRYALDRSRYDAAPEQLKPLLKQGWALMPTL  
KT  
RSYTLRQLYDGYVYVDFETAGTLHEYVASANNHLSRIVWTDQIGSDQRSGASDGKPFLLYPRRSTLHI  
AF  
SPQQWTWRVCEHMRSSAPSRALWMKALDLASYCITMAEPDTLPVNRIAEAVADIDKGYVTDDGRFADSAI  
PT  
ARPLSEDAETHLLWAPLGADVFWQGSVDDQDSSLLIALDDPLAVFNDLGMQLAADQAAFRDWQARHEHKI  
QI  
AQTVSGLCGAESDPQKLPASVRGNAARTHQYLSEVEAYFEQCILEEAQISSSNVPGDFLLLPDMFKSLDM  
RK  
SIEARYGSAPTEEAAQTWKDRHKWRREVDLSGARQYLQOHLPSGDALLQQVRDTQRDFQLWATHIGTDPF  
KL  
FIDTTRPTQLLYLQTIMLNLQIIYAQDSAATTWLAEQEANASTLFGTLRYGFSPALKQALHEEADTLLNG  
LG  
DVTNLATRIGELNGALNHQGFADKPWMKALKQPVQGTFKALGELASGAGKTTLESILLAWVPIDSRMAG  
KQ  
QNIWALLRLLIGQILLGSTARIAVDQVFTKLKQWIREWQVLNKQISDTRRSWLYPTAYNTRKSNASHL  
RV  
LEEKLRHLHLSIPALLDYQNNQYAKQLQDEIRLHFQSGKTMAKDWLTTAKRWIDGLGGIAGSITWGVIML  
NF  
INTALTYRDLTRDGFSAKDIGKVTYGLGYSFNLLMAVFVEAPWAVISTAKPVVIGTYTVGILDQSAAYW  
KA  
RGNVWGDVIRGFRSSMVAMGAFGIAAATLELKDILEDFTARTIEEKTAISVKGTSVFMGAGSTIQLA  
AG  
ISPTAKITAVAMSSWLNVALLVAGFIYLFATMALNYLKQDSVWLRKCCWSKNLDYRYAETAHGENEEI  
QA  
LLEIRLSPQVYVYKSTVHYEERYLGKGDYSSAAVQNGAGVQVRLPNLVRGQSVHFNISSKRPWGVLPVEK  
ID  
QPIHDAFLDRGQFRKSEQFGTLTNKPADKASEDFTYPLMPHEDEDLIWETWVPLDKDATYLELQIWYPSN  
LI  
HPGEEDRGYLFQIELGTRGDTSDGLTAVELEVKALSRTGTLTLEVAESRPL-----

-----  
-----  
-----  
-----  
-----

>A0A2K4WEY4\_9PSED/1-749

MTDKYGTHQRRALFPKTPATATSLCPRFGPNIAIVPVRYALDRSRYDADPRQLKPLPKDGQWARLPKL  
KT  
RSYTLRQLYDGYVYVDFETAGTLHEYAASATNGHLSRIVWTDTHIGNDQRNGAGEGQPFLLYPRDNRLHI  
AF  
SPMQWTWRMCEHMRSHTPSRALWMKALDLASYCLTMAEPDTLPLDRIAEAVADIDNDRVDDGRFADSAI  
PT  
ACPLSEDAETHPLWTPLGADVFWQGSVYDQDSSLVIALDDPLAVFNDVGMQLAADQAAFREWQSVHEHKI  
QI  
AQT VATLCGAESEPEKLPASVHGDALRTHQYLSEVEAYFEQCILEEAQISSSNVPGDFLLLPDMFKSLDM  
RK  
SIETRYGSAPTEQAAQAWKDRHKWRREVDLGSARQYLQQHLPTGDALLQQVRDTQSDFQLWATHIGTDPL  
KL  
FIDATRPAQLLYLQTIMLNLQIIYAQDSAATNWLAEQEANASTLFGTLRYGFSALKQALHQEADALLNG  
LG  
DVTNLA TRISELNGVLNHQGFADKPWMKALKQPVQDTFKALGELASGAGKATFESVLLAWVPIDSRMALG  
KQ  
QNI VALLR TLLIGQILLDSTVRVAINEQTVTKLKQWVREWRVNLNKQISELVRSWQYPNAYNTRQSTARNL  
QA  
HKHKLRVHEL SIPALLDFQNNYAKLLQDEIRQYFQSGKTLAKDWL LARAKGWTDR LGGVAGSITWGVVML  
NL  
INTAFLYRDLTRDGD FSTKD IGKVTYGLG-----  
--  
-----  
--  
-----  
--  
-----  
--  
-----  
--  
-----  
--  
-----  
--  
-----  
--  
-----  
--  
-----  
--  
-----  
--  
-----  
--  
-----  
--  
-----  
--  
-----  
--  
-----  
--  
-----  
--  
-----  
--  
-----  
--  
-----

>A0A0F5V895\_9GAMM/1-1402

MSPDYKQPKRFVKAAYQPLDERIYSSKPEPVPETDPAPAYAYSVSFACRAELYRQYVKPYLSLQLNQTAE  
EG  
ARSQWSEKAQQH THVSCEVSKQEEKTFRASWRDSPLVTLGADGVLPHDKSATVIQEAFVVRPAIQMGE  
QL  
GLPTKGYLYHFLEGR LISEYRCMGETYPRFQVTQSRPEAMYPEPAIDRPLEFILALWQRNGQTVQDQYLL  
YS  
QEALTD DVIKSVDTVFLDQHGVKLD MQIIPLTENGRQRQKHTVAEGETLSGIADQYQMTLETLLSLNPF  
WR  
GKETQLSIGSALYLESVGIYNHGQDVAYPAAAMMLADGVFAISASQQRADFPVVKVAEADAGQFTALSPV

RY  
AIDALNEKGQGLHPIQNTEVFSGGIFQSEYTAYTLRQIRDGWLYALRPLPESEAWQLEEKIEQGEFRRV  
EG  
HTAQARAAAEPQPPKSHILCATASLYLAYSVKRWTDRCNFYLTDAQARDNWLKVDLTTSGAHCHRAD  
VA  
MVECAVADVNVVEGQDPFAGTCAPLTGEPGKPNDFIHVPPKKTLASYYQAPSAHGQQIVALDDPLADLSD  
LY  
LALLEPVLTTTPDEQTHRKVVLAEAIRSMVRVSIPQDKMPDIEPEQWVEFESALDVCLEYQYQIPILHTG  
PD  
NTLSARLELLNQYKQASLKAQAKLEAMGFFGVEDHVQEYTERKKAHSQVNWGDLDTFYKAYLASQAGAYA  
AI  
PGAFDRLLAALPRLGTEPMRLGLDMLYSDHMAYLMELFGEILPALNSSASDDAMQQKLAELVQETPDNL  
MA  
LATSFFSAEFYTKADELVKESDVLDLQRESVPVTGVVAGLNSVLGFGLGTESALYQKTLSMVVPLGGLID  
SA  
IEAVKKTAGMGFQKGYFTYLGIAMKKGGRSGFNVAAMSWSLAQIAQKIGLNPAFEETSQAFRQRFSGA  
VS  
EWQSLDEQLKMPADSPNRTALELKQKMETRVAQMVTEAPGVYESFNGAKLQSFNRALDRANQGF SRLG  
RL  
DFVVAFLNAINVVAQQYAVEETLASTPNADVNTQRHVVGFFSTAWLMHATSEIFRGLAFDQVKQDPRLKK  
KI  
DELARKGVSLETRALAKSYLQRSMLAGMLGVVAAGWEAYRTILDAMNADFRVEKGLLALKAGVLIGQGV  
WG  
ALFVRGLIAGTNRLAVGVVLQGMVAAWFWLGIAYLAVSVIINALQKSPLESWLRKSVWGQEPKGDWTAE  
TE  
YQALLQILNQPQIKAVIKSARQLPGKFASPYAPLPYTFQQQLKLTFFPQQRPGQRIE VGVTVTGLREREVY  
EG  
YYKTTKADAFTYQLTGQHITRGEWEWDEHQVPTLALNIPIWVERIDTIRVFAVVNNHNPFTESQQTAYY  
KY  
QLHPQLQPETDVMKDSQASEMKGHQLISVKIEDV--  
>A0A3M5T6B4\_9PSED/1-900  
MSAYFLERCSAYTAGELPVAAQRM SRMTDKNGTHQORRAALFPKTPATATSLCPFRGNIAIVPVRYALD  
RS  
RYDADPRQLKPLPKDGHWARLPKPKTRSYTLRQLYDGYVYVFD ETAGTLHEYAASASDGHL SRIVWTD  
AH  
IG  
NDQRNGAGEGQPFLLYPRDNRLHIAFSPMQWTWRMCEHMRSHAPSRTLWMKALDLASYCLTMAEPDTLPL  
DR  
IAEAVADIDNDRVDDGRFADSSIPTACPPSEGAEPDPLWAPLGADVFWQGSVYDQDSSLVIALDYPLAV  
FN  
DLGMQLAADQAAFREWQSVHEHKKIQAQTVATLCGAESEPEKLPASVRGDALRTHQYLSEVEAYFEQCIL  
EE  
AQISSSNVPGDFLLL PDMFKSLDMRKS IETRYGSAPTEQAAQAWKDRHKWRREVDLGSARQYLQHLPTG  
DA  
LLQQVRDTQSDFLWATHIGTDPLKLFIDTTRPAQLLYLQTIMLNLQIIYAQDSAATNWLAEQEANASTL  
FG  
TLRYGFS AALKQALHQEADALLNGLGDVTNLATRIGELNGVLNHQGFADKPWMKALKQPVQNTFKALGEL  
AS  
GAGKATFESVLLAWVPIDSRMALGKRQNI VALLRLLIGQILLDSTARVAINEQTVTKLKQWVREWRVLN  
KQ  
ISELVRWQYPNAYNTRQSTARNLQAHKHKLRVHEL SIPALLDFQNNYARLLQDEIRQYFQSGKTLAKD

WL  
ARAKGWTDR LGGTAGSITWGVV MLNLINTAFLYRDLTRDGFSTKDIGKVTYGLGYSFNLLMAVFVEAPW  
AI  
ISTAKPLVIGGH DVGILDKSAAYWKARGNAVWGDAIRGFRGSMVAMGGFGLAAVMLELFDVADDFYAAKT  
SE  
EEYGLRVKWSSV LMMGLGSAAQLFGGFFPASVLFSK-----

-----  
-----  
-----  
-----  
-----  
-----  
-----  
-----  
-----  
-----

>A0A0C2NFN8\_PSEST/1-1143  
MSATTSDKTLQQA KRNQAFENNPATANGQCPLKAGEIAIHPVRYAIDESPARGSAQGNPLPNGWSAGHL  
PK  
LKTRSYTLRQLR DGWLYVWDETDRTLHEYQVEGHQFTRHKWGSAQLGEDERN NPGDSKPYLLYPKRSRL  
IA  
YSPVQWTWRLCEK MRSNPQEQKRWMRALNLPQYCTQMQAHAAPIREIGSAVADILAGGEAPTFKSCLVT  
AN  
KDDSSRPCKQP IDQALILG SVPDQDSALFVALDDPMAIVDDLAMNLQGRWLELAAADKQHANKINSATLI  
QG  
LCGVKLD PFIKSVLANPSRKQAFIKDAHNLLDSEAQLLNHSGSDATLTLKSLQVQRAQQFRTNWGNPP  
SG  
PKWRALVEEWQ QKKTWREDVRFDEAWSYLQERSDETERLNAHIQRSESDLLAWLKSLSPKAEV FYDPCH  
PQ  
QSTDLLDTMANLYEQ LGASDTGKQWLCEQYGEPTTLAGLALFNFS AELSALIDKISANFTTYGAIDNQGR  
QA  
DGSGQAHGGLSDTT SEVSRANEVKSVL DLPSVQASNLYKNLSEPGKRAFETLRNVVGQKAKDSWNLMAFV  
LL  
PALSTKFAPKVRI FAFSVTQVLVSTEISTQTRLILDPEFAKKNRQWQMVAQLEKNIKGLQRTLALPGKG  
PD  
KRSARIQ LLELEQKRGLNLRPN EIGSVATETKISNVQTRQVNAWLATLGQSELLEQLQKAKSATGY  
AA  
RSRQWINQELGGS L PVLVAGLNVWNFINSLDKARNDGIFSADELRTVGANAAYTANALMALWTVPAWNKW  
AS  
LKAVVNEKT VQLAQVGVKAWGINTQYRSLARSLALRTAGMAAFGAIAAGVEAWQVSKDIDKATSAGETYA  
LR  
TKQITLGLMSV VAGVQLVGSALGF WFGFAWMSNPATIIIIALLGVIYLIASMVANQYKREGLRLWLYRSS  
WG  
KSPTWTHSDEH HKELRTLKEICLRPSLAARASTLPYYGRGPRIYTGFWLQLLLPSELAGASVKLQPAMV  
DS  
GWFSDSLMOGMAD KFYDQFLEGHWAPIEQFGOPPAQRPNGPLPGDTLYPDGTQHRLWQTIAYQRPPVLE

LE  
VRYPEQVLESTNGQGYMFRVDIGTSSSEADLKSDAFSKEPNSDMVLSSQSTRWLSLQVPHTSK-----

--

-----

--

-----

--

-----

--

-----

>A0A0P9YMM1\_PSESX/1-1088  
MRYALDRSRYDTAPQKLKPLLKGSRWAVMPKLTSTRSYTLRQLYDGYVYVYDETAETLHEYAVSAATGNLGR  
RI  
VWADTQLRSDRRSGADDGKPFLLYPRNNRLHIAFSPLQWTWRTCEHLRSNPASRSAMKALDLKRYCMTM  
AE  
PDTLPLNRIAEAVADIDKEHVDDGRFADSAIPTSKASSEETQPLFSPIGADVFWQGSVDDQHSSLLIAL  
DD  
PLAIFNDLGMQLAADQAAYRNWQAEHEHKIQIAQTVTALCGAEGEPEKLPASVRSNAALTHQYLSDVEAY  
FE  
QCMFEQEQIGNNTAPGGVLLLSDVFKSPEMRRSLEMRYGSAPADEALQAWKDRHKWRREVDLSGARQYLQ  
QH  
LPTGDTLLQQVRDTQSDLRQWSTHLGTEPLKLFVDTTHPESLLYLQTLMLNLQIIYAQDNAASTWLAEQE  
AN  
DSSLFGTLRYGFSPALKHALHQEANTLLNGLGDVTNLATRIGELNGTLNHQGFADKQWMKALKQPVDTF  
KA  
LGQLASSAGKATFESILLAWVPIDSRLAVGKQQNIVALIRTLIGQILLDSKARIAIDHKMLAKLKNWIS  
EW  
QVLNKQISDTRRSWLYPTAYNSRKSIAHLRTLEQKRLHEL SMPALLDFQNNYARQLQDEIRLHFQSG  
KA  
IAKDWLATAKRWLDGLGGIAGSITWSVIMLNFINTAFTYRDLTRDGD FSAKDIGKVTYGLGYSFNLLMAV  
FV  
EAPWAVISTAKPLVIGGYNIGILDKSAAYWKARGNAIWGDAIRGFRGSMVAMGGFGIAAAALEILDIGND  
LN  
DIKTSEERIASEIKIASVAMMLLGSAILQSAGIFPTTFLAAFAMASWFSVLLLLTGVVYLLATMALNYFK  
QD  
SIGWWRKCCWSKSIEYRYSTNGEGQLEEKLALLTIQLSPQVYVKSTTRDETRYLGKGDYYSTPEQYGAG  
VQ  
ILLPKAVRGQSVHFNVISSKRPWGVLPVKKIDSSIQESFLSRGQFKKTDHFGNLANLPARNAEEDFTFPR  
MP  
PESEDLVWETWVPLEKEAAYLELQIWYSDNLLNSGPQDIGYLFQLELSGKGETAINGVDTTVLEVKSASR  
IN  
ALTLEIAD-----

--

-----

--

-----

--

-----

--

-----

>A0A330KC33\_PSEX/1-853

MTDKHGTHQRRRAALFPKTPATATSLCPRFGPNVAIVPVRYALDRSRYDAAPEQLKPLPKQGKWTLMPTL  
KT  
RSYTLRQLYDGYLYVFDDETAGTLHEYVASANNGHLSRIVWTDQAIGRDQRSGASDGKPFLLYPRRHTLHI  
AF  
SPQQWTWRVCEHMRSSAPSRALWMKALDLASYCITMAEPDTLPLNRIAEAVADIDKGYVTDDGRFADSAI  
PT  
ARPLSEDAETNPLWAPLGADVFWQGSVDDQDSSLLIALDDPLAVFNDLGMQLAADQAAFRDWQAEHEHKI  
QI  
AQTVSGLCGAESDPQKLPA SVRGNAARTHQYLSEVEAYFEQCILEEAQISSSNVPGDFLLLPDMFKSLDM  
RK  
SIEARYGSAPTEEAQTWKDRHKWRREVDLGSARQYLQHLPSGDALLQQVRDTQRDFQLWATHIGTDPL  
KL  
FIDTTRPTQLLYLQTIMLNLQIIYAQDSAATTWLAEQEANATTLFGSLRYGFSPALKQALHQEADALLNG  
LG  
DVTNLATRIGELNGALNHQGFADKPWMKALKQP VQGTFKALGELASGAGKTTLESILLAWVPIDSRMAG  
KQ  
QNI VALLRTLIGQILLDSTARIAVDQQVFTKLKQWTREWQVLNKQISDTRRRWLYPNAYNTRQSTARNL  
HA  
HKQKL RVHEL SIPALLDFQNE YAKLLQDEIRQYFQSGKTLAKDWLAQAKRWTDRLLGGTAGSITWGVIML  
NF  
INTALTYRDLTRDGD FSAKDIGKVTYGLGYSFNLLMAVFVEAPWSVIRDATPVLIDGKNVGVLDRSSAYW  
KA  
KGNVTWGD AIRGFRVSMVAMGGFGIAAVVLELFDITDDFHEAKTSGEEYGIGIKETLKKTS-----  
--  
-----  
--  
-----  
--  
-----  
--  
-----  
--  
-----  
--  
-----  
--  
-----  
--  
-----  
--  
-----  
--  
-----  
--  
-----  
--  
-----  
--  
-----

>J3IH61\_9PSED/1-1162

MTQPATEAQLKQANRNQAF TNAPMGSGQCSLMAGEVAIFPVRYALDESPQKGS AQGNPLPKNWSGKPAE  
LK  
TRSYTLRQLRDGWLYVWDSVDKTFHEYQVKGEQFTRHKWADGQLNQDVRNNPGETHPYLLYPRRNQLRIA  
YS  
PVQWTWRMCELMRSSATEQTQWMRKVDLAGFCASGKVGHG GPITELGKS VSDILAAGETSPTFKSTLLPT  
QA  
PEKGGPFKPAFEEALVRGKVPEQDTALFIALEDPLAMVDDL SMNLAGRLMEQGRFENLNQYKLQSAIAVQ  
NL  
CGFDTNSFTPDSIKDPIKRQDYADDLYNLLGTNDEM ERGKDLVTGDQAAMVEMGSASSTTAAQAKFKAKW

GH  
LPDREKWQAAL EEWNAKRYWREDVRFDEVQKYL SKTTTEAQLQDHCQRSEQDLIKWLDLLSPSAEAVFH  
DT  
TDEAQACLLIETAHALYTLLGNGEKGQEWLCKQAKQPSKLFGMALFNFNPELATLIKQVTHNFTTTGNLD  
DQ  
GREGDGSAAATLPTSSSDATNIATRVAEIKAVLDLDDVVKNSKLYKAVSNAAKQSLATLIKVANNQAKDAW  
HG  
LSTLLL PAMKQEIALTLAVPQVLISTEISSATQLSFNPNYQREYQAWQMKLSTLNKKMDGARGVLERPGA  
AY  
DQRSARISLQAFEQELKVL FSTQPHQIVAKASGSTRLDAGLPKINSWLADLGQSELAQAQLRSAGTIEYVT  
RT  
KTWVGQNLGNALPALLVGLNVWVYNTAKQAQNDGNFTKDELRLNGSSAAYAANAIAALWVGPAWSRAGA  
MS  
LEVGEKTLKLAQASYAQWIDEAKTAIKTNGSGSTDVTAANKMATYSKGLILRTLWAVFGVIATGLEAWQ  
LS  
KDIEGATSDTEKNLLKTKRIIVLGMFAIAGIQTVGAALGFWFGFAWMSNPVTIILAVLGVAYLMITMAA  
NR  
YKREGLRLWL YRCNWGRGALPEWLGSDGHSKQMQLLETLQRPSVVGALYGGGSTPRKSFQFWAQIQF  
PA  
SLDGINVALQPAMIQNNYFSKNKLEATQAGFYDQFLLGNWIDPKLTGELPSYVGPKNPPDFVYKKTQDQ  
RL  
WQVWIETSNDDPAFEIEIKYPPGSFQKSENSRGYMFKIAMESTSRNAESVNDISSGEIKDDIVLSQKSTK  
TL  
TLAVPNWTK-----  
--  
-----  
--  
-----  
--  
-----  
-----

>A0A2G0W244\_9PSED/1-1159  
MTQPATAAQLKQANRNQAFQNTSMAKGQCPLMQGEVAIFPVRYALDESPKKGSAQGNPLPSNWSGGTLP  
SL  
KRSYTLRQLRDGWIYVWNSTEKTFHEYQVKGEMLTRHTWTDGQLNKDVRNPNPGTTQPYLTYPRNSQLRI  
AY  
SPVQWTWRMCELMRSRATEGTQWMRKVDLPTYCTQAKVSHGAAITELGKSVADILVAGEKAPTFTSTLLP  
TQ  
ATEADAPFKPAFEEALVRGRVPAQDTALFVALDDPLALVDDLNMNLIGRLMEQSQFEALHQHKLQSAFAV  
QN  
LCGLNTDALIPSSIKDPIQRQAYTDDL YALLSTNDQVERGKDLVSGIEAPLVEMGAASIISASQTLFTSK  
WG  
KLPEHTAWQNAVEEWNARLWREDVRFDEVQYLSQTTREALQLQQHIQRSEADLLTWLDQLSPSAEAVY  
HD  
TCNEEQATQLLETAHALYTALGNAQAGQTLCEQAKKPTKLFGLALFNFNPHVANLIKQVTHNFSTTGNL  
DD  
QREGDGGSAALSPTSAGDATSLARTGEIKAVFDLELVKNSKLYKAMSDAACAAMTTLIKVANNQAKDA  
WH  
GLSGLLLPAMKQQLGLLLAVPQVLISTEISSATQLVFNPTYQRDFQAWALKVATLQKKIDGDKRIVHRPG  
TP  
HDQRSARISLQAHEAQLKNMLERPNIQIVAKASGSTRLNAGLPTINQWLADLGQSEVIAQLKLTGTHAYL

DR  
TRAWMNQNLGNALPVLLVGLNVWNVFNSANKAYNDGQFSADEWRTVGANAGYAANAIAALWVGPAWSRAG  
GM  
MAEVGQKTRSLAQSSYKSWLSEAKDAAATGNSAKATVANEMAAASKGLILRTVTWAALGAIAGLEAWQI  
SK  
DAGGATSKEESTVLWAKFGVVFMSFIATGQLVGAALGSFFGFVWVWSTPVTIILAILGIAYLMITMVAN  
RY  
KREGLRLWLFRCSWGRETESKWLGDGHPKQMQUALLETLQRPSVLGRALYYGGGSTPRTWLGFWVQIQVP  
TA  
LVGKDITLQPAMVEKKYLFSDNKLQTTATGFYEQLLHGNWVDPKQLGLLPDGPGGKIGLTDVYKNTQEQY  
RV  
WQAWIGTSTASPIFELEVRYPAGVLQRNDGRGYLFRLLALEWASSEADRANNAFSGELTEKDDIVLRLSGT  
QL  
LKLAVPS-----  
--  
-----  
--  
-----  
--  
-----

>A0A3A9IL24\_9GAMM/1-723  
MNRTYQIKQGDTLSDIARRHHTTADEIAKRNAIPAPHILYPGQTLILPDANALALDSAASIEGAMLAALC  
AS  
NKDCKSPVGPCPFNNAETALVPVRYALDEPFEAPATQPHPLPATGFKGPLALNTPYTLRQLRDGWLIVFD  
ET  
AHILDEYEVKGTQFIHANKGSKGHVLYPARHTVAMAFSHQRWTERLKTAYCEQDDLRSKGMRRFALPSLA  
RN  
MGGPHAGLPALLASHVADMGLPNDGFVMSCAPLKAPDGVPEGLLWRDKPAGSSYASRANMPDPQSALVVA  
LD  
DLISDMHDVTIRQAAVWCMREAPFDDDLSRHKWTMATITEMIGLPPVDEWQLPAAVKGNRLATFQFKKNL  
LA  
YANAEWERRKFMRAPSTDYSTPQMAASLTERVEQALAVLQGYKPTPELAQAWGEYRYQDVVRWQELESYI  
AQ  
HQPLEDKLSQQWASTCDDALTGLEALPINPLLLGFDTQTPAGQTYLIASLSEWLSTAQMMGADEKRAAAL  
QK  
ILQKGALPAQAYYGFDAAVKEELVAKRPWLNISHVTAGMNAAAGWSLLANEGRLLDSKLFAGLGASSKAT  
MD  
ALHQAIAGPAIKAWERLMMMLRPLVLKGSSGAAWAAATLEAVHTGQAVRFNKSFGTELKAWLQQQRDAA  
GM  
QSRLLGTPGRAITSYQTQGLGQAGQQLQRVHWPRLLLIEGKQVELEANMARYQSLLRQGGRQSYWEGWQS  
VG  
WLG-----  
--  
-----  
--  
-----  
--  
-----  
--  
-----



>A0A2T3NRG1\_9GAMM/1-1137

MTNANDNASNQSQDEAGALSGQCPMQLGVDIVPVRYAIDEEDDNGEGKFGLEQWQNGIFQRNLIESD  
YT  
LRQLRDGWLVIADYDKTFHEYEYVKGSDFIKYNLESWVKEKGTDRGAPGSQSPFLTYHQNTLYIAWSK  
ER  
WSWRLFNFVLENKSNSKSWMRVSLNQYCRTLQASHAGEAEKIAEAVADISESASDTLLFEGHMAQTAES  
QT  
TETEDSTQTEIKPVITKGTVTGAMADVKSALFVALDDPYTDLQDLSLALTREL FVLEALNDEKGHKHAL  
LE  
TTAQVIGLNTPKDTQYPTSIKTLKEKKQYHQLLSEYYNIKKAVQDHSILIRDKQSLIDDGSYDYHLSHH  
ER  
LKEKLTAAQQDNLKQKYRGIEPNNEFNFRWKDTKKWRDEINEDALITDIDEYAQNLPILAEQAQKVERY  
RS  
QLQAACRTFGWHPERGFVDNETREGQDFLSEINYFLIESMSKALDDKAVEWLKNEFDSPKTLMPLYLSGY  
SK  
ALYQAIQEELPEPSIYLTGNDYDDAANTLTAIDDFLSNKTIQDTKFFKDLKAPLQNVLTVFSESVKVISE  
GA  
ISSIAHKSSLLILANNHFIHFNIIAEKVALNTNLRTNPHYADEIKKWSAKYNAASQELRYLELEAHL  
KA  
SRMHDISIAGMDDSIDSEIETQKRKMTDLQRAAQAKLSDLNDIYYDNPSVFYLAKDNIDDLKDFRLDI  
KN  
KIKMGVAITSNSYNRLGGFGFMVFLNVDLKLAFSSMQAKRVVSESERVEILQKIGYLSAFSSIFQAK  
AW  
SNITIKNDKKFHQKSIRFLIKKANPKELKNISKYLKITRLVTVFSLLAIGSELYTYNDFKASSDTVKIL  
NG  
LKITSLILSFGVSAVQLGACLFKGIFTFGVFTGPIVAIIIGLIAGIAYIFATITLNLARKDDYQKWLQQT  
WG  
SKPNLHWSIDTSDGVINALLALYKITLKPCLTAKHHTETIHSQSYPAIRKEIIGITLLELSHEINPEY  
VD  
LNFIEPRNIVSNHGIWTKVKDRINSKNNIHTYTLKINFSQKNQDFDIKVNL PFTP DENSQLFKIVTYRYV  
FD  
YTMFTDVETPIPALNDDEIDIHKKIQEQKNIDYCLFLHGKPAGEYHFIGDKQCLII-----  
--  
-----  
--  
-----  
--  
-----  
--  
-----  
--  
-----

>A0A1G9WNX4\_9PSED/1-1143

MSATTSDKTLQAKRNQAFENKPATANGQCPLKAGEIAIHPVRYAIDESPARGSAQGNPLPNGWSAGHL  
PK  
LKTRS YTLRQLRDGWL VVWDETDRTLHEYQVEGHQFTRHKWGS AQLGEDERNNPGDSKPYLLYPKRSRL  
IA  
YSPVQWTWRLCEKMRSNPQEQKRWMRALNLPQYCTQMQAHAAPIREIGSAVADILAGGEAPTFKSCLVA  
AN  
KDDSSRPCKQPIDQALILGSVPDQDSALFVALDDPMAIVDDLAMNLQGRWLELAAADKQHANKINSATLI  
QG  
ICGVKLDPFIPKSVLANPSRKQAFIKDAHNL DSEAQLLNHSGSDATLTLKSLQVQRAQQQFRTNWNPP

SG  
PKWRALVEEWQKKTWREDVRFDEAWSYLQERSDETERLNAHIQRSESDLLAWLKSLSPKAEVFPCH  
PQ  
QSTDLLDTMANLYEQLGASDTGKQWLCEQYGEPTTLAQLALFNFSALSALIDKISANFTTYGAIDNQGR  
QA  
DGSGQAHGGLSDDTTSEVSRANEVKSVDLPSVQASNLKYLSEPGKRAFETLRNVVGGQKAKDSWNLMAFV  
LL  
PALSTKFAPKVRIFAFSVTQVLVSTEISTQTRLILDSEFAKKNRQWQIQVAQLEKNIKGLQRTLALPGKG  
PD  
KRSARIQLELEQKRGTLNLQRPNEVIGSVVTETRITKVQTRQVNVWLATLGQSELLDQLQLKAKSATGY  
AA  
RSRQWINQELGGSLPVLVAGLNVWNFINSLDKARNDGIFSADELRTVGANAAYTANALMALWTPAWNKW  
AS  
LKAVVNEKTVQLAQVGVKAWGINTQYRSLARSLALRTAGMAAFGAIAAGVEAWQVSKDIDKATSAGETYA  
LR  
TKQITLGLMSVAVGQVLVGSALGFWFGFAWMSNPATIIIIALLGVIYLIASMVANQYKREGLRLWLYRSS  
WG  
KSPTWTHSDEHHKEELRTLKEICLRPSLAARASTLPYYGRGPRIYTGFWLQLLLPSELAGASVKLQPAMV  
DS  
GWFSDSLMQGMADKFYDQFLEGHWAPIEQFGQPPAQRPNGLPGDLYPDGTQHRLWQTWIAYQRPPVLE  
LE  
VRYPEQVLESTNGQGYMFRVDIGTSSSEADLKSDAFSKEPNSDMVLSSQSTRWLSLQVPHTSK-----  
--  
-----  
--  
-----  
--  
-----  
--  
-----  
--  
-----  
--

>A0A0P9TAR4\_PSEA0/1-904  
MTDKHGTHQORRAALFPKTPATATSLCPRFGPNVAIVPVRYALDRSRYDTAPGKLLPKQGWALMPTL  
KA  
RSYTLRQLYDGYVYVFDDETAGTLHEYVVSANNGHLNRIVWTDQAIGSDQRIGPSDGKPFLLYPRRNTLHI  
AF  
SLLQWTRICEHMRSSAPSRARWMKALDLASYCITMAEPDTLPLNRIAEAVADIDKGHVTDDGRFADSSI  
PT  
ARPLSEDAETHPLWAPLGADVFWQGSVDDQDSSLLIALDDPLAVFNDLGMQLAADQAAFRDWQAEHEHKI  
QI  
AQTVSGLCGAESDPQKLPASVRGNAARTHQYLSEVEAYFEQCILEEAQISSSNVPGDFLLLPMFKSLDM  
RK  
SIEARYGSAPTEEAQTWDRHKWRREVDLGSARQYLQHLPSGDALLQVVRTQSDQFLWATHIGIDPL  
KL  
FIDTTRPTQLLYLQTIMLNLQIIYAQDSAATTWLAEQEANASTLFGTLRYGFSPALKQALHQEADALLNG  
LG  
DVTNLATRIGELNGALNHQGFADKPWMKALKQPVQGTFKALGELASGAGKATLESILLAWVPIDSRMAG  
KQ  
QNIVALLRLLIGQMLLGGSKARIAVDQVFTKLKQWIREWQDLNKQISDTRRSWLYPTAYNTRKSNASHL  
RV  
LEEKLRHLHLSIPALLDYQNNQYAKQLQDEIRLHFQSGKTMAKDWLTTAKRWIDGLGGIAGSITWGVIML

NF  
INTALTYRDLTRDGDFAKDIGKVTYGLGYSFNLLMAVFVEAPWAVISTAKPVVIGTYTVGILDQSAAYW  
KA  
RGNAVWGDAIRGFRSSMVAMGAFGIAAATLELKDILEDFTARTIEEKTAISVKGTSVFVMGAGSTIQLA  
AG  
ISPTAKITAVAMSSWLNVALLVAGFIYLFATMALNYLRRV-----

-----  
-----  
-----  
-----  
-----  
-----  
-----  
-----  
-----  
-----

>A0A3M5NIM4\_PSEX/1-816  
MSLSNRKVPISSEGERCTPNICSYPLNCASTCLMNTVRKPKVPRMLRMIDKNGTHQORRAALFPKTPATAT  
SL  
CPRGPNIAIVPVRYALDRSRYDVNPRQLKPLPKDGQWARLPTLKTRS YTLRQLYDGYVYVFDEMAGTLH  
EY  
VASATNGHLSRIVWTD AHI GNDQRKGAGEGQPFLLYPRDNRLHIAFSALQWTWRICEHMRSHAPSRALWM  
KA  
LDLASYCLTMAEPDTLPLDRIAEAVADIDKDRVDDGRFADSAIPTARPPSEGAEPDPLWAPLGADVFWQ  
GS  
VYDQDSSLVIALDDPLAVFNDLGMQLAADQAAFREWQSVHEH KIQIAQTVATLCGAESEPEKLPASVRGD  
AL  
RMHQYLSEVEAYFEQCFEDAQIGSNTVPGLLLLLPDVFKSPDMRRAIQARYGSAPTDEAAQAWKDRHKW  
RR  
EVDLSSARQYLLQHLPTGDKRLQQVRDTQSD FQLWATHIGTDPLKLFIDTTRPAQLLYLQTIMLNLQIIY  
AQ  
DSAANAWLAEQEANTGSLFGTLRYGFSPALKQALHQEADALLNGLGDVTNLATRIGELNGVLNHQGFADK  
PW  
MKALKQPVQNTFKALGELAGGAGKATFESVLLAWVPIDSRMALGKQQNIVALLR TLLIGQILFDSTARVA  
IN  
EQAVTKLKQWVREWRV LNKQISDIRRRWLYPNAYNARQSTARNLQAHKHKL RVHEL SIPALLDFQNEAYA  
RL  
LQDEIRQYFQSGKTLAKDWLARA KGWTDRLGGTAGTITWGVVMLNLINTAFLYRDLTRDGD FSTKDIGKV  
TY  
GLGYSFNLLMAVFVEAPWAIISTA-----

-----  
-----  
-----  
-----

---  
-----  
---  
-----  
---  
-----  
---  
-----  
---

>A0A3D5QFH1\_PSESP/1-1143  
MSATTSDKTLQQAQRNQA FENKPATANGQCPLKAGEIAIHPVRYAIDESPARGSAQGNPLPNGWSAGHL  
PK  
LKTRS YTLRQLRDGWL YVWDETDR TLHEYQVEGHQFTRHKWGS AQLGEDERN NPGDSKPYLLYPKRSRLL  
IA  
YSPVQWTWRLCEKMRSNPQEQKRW MRALNLPQYCTQMQAHAAP IREIGSAVADILAGGEAPT FKSCLVA  
AN  
KDDSSRPCKQPIDQALILGSVPDQDSALFVALDDPMAIVDDLAMNLQGRWLELAAADKQHANKINSATLI  
QG  
ICGVKLDPFIPKSVLANPSRKQAFIKDAHNLLDSEAQLLNHSGSDATLTLKSLQVQRAQQQFRTNWGNPP  
SG  
PKWRALVEEWQQKKTWREDVRFDEAWSYLQERSDETERLNAHIQRSESDLLAWLKSLSPKAEVFPYDPCH  
PQ  
QSTDLLDTMANLYEQLGASDTGKQWLCEQYGEPTTLAGLALFNFS AELSALIDKISANFTTYGAIDNQGR  
QA  
DGSGQAHGGLSDTTSEVSRANEVKSVDLPSVQASNLYKNLSEPGKRAFETLRNVVGQKAKDSWNLMAFV  
LL  
PALSTKFAPKVRIFAFSVTQVLVSTEISTQTRLILDSEFAKKNRQWQIQVAQLEKNIKGLQRTLALPGKG  
PD  
KRSARIQLLELEQKRGTLNLQRPNEVIGSVVTETRITKVQTRQVNVWLATLGQSELLDQLQLKAKSATGY  
AA  
RSRQWINQELGGSLPVLVAGLNVWNFINSLDKARNDGIFSADELRTVGANAAYTANALMALWTPAWNKW  
AS  
LKAVVNEKTVQLAQVGKAWGINTQYRSLARSLALRTAGMAAFGAI AAGVEAWQVSKDIDKATSAGETYA  
LR  
TKQITLGLMSV VAGVQLVGSALGFWFGFAWMSNPATIIIIALLGVIYLIASMVANQYKREGLRLWLYRSS  
WG  
KSPEWTHSDEDHKKELRTLMEINLRPSLAARASTLPYYGRGPRIYTGFWLQLLLPSELAGASVKLQPAMV  
DS  
GWFSDSLMQGMADKFYDQFLEGHWAPIEQFGQPPAQRPNGLPGDTLYPDGTQHRLWQTWIAYQRPPVLE  
LE  
VRYPEQILESTNGQGYMFRVDIGTSSSEADLKSDAFSKEPNSDMVLSSQSTRLLSLQVPHTSK-----

---  
-----  
---  
-----  
---  
-----  
---

>Q6LQF5\_PHOPR/1-1136

MANANVDASKQSQDEAGAPSGQCPMQUALGIDIVPVRYAIDQEDDEGLGTFGLPEQWQNAIFQGS LIESD  
YT  
LRQLRDGWLYVIADYDQTFHEYEYVNGSEFIKYDLNSWVKEQKTD RGS PGNQNPFLTYNQNTLYLAWSK  
ER  
WSWRLFNFLVLENKSNSKSWMRRVSLNQYCRTLQASHAGQAEKIADAVADISHSASDEILFEGYMAQTAQS  
KN  
TEDDGIDLEIKPVLSKGAVTGAMNDVKSAFFVALDDPYTDLQDLSLALSREV LLL ES LNEEKGHKHALLE  
AT  
AQVTGLNTPVHLQHPESVKT LAEQKQYYQDLANYDYDTKADIQKHHALLQKSGPSSEH IHSTNFDRSRREF  
KA  
ISEKFKQHYS D IEP SDDAYFTRWQETEKWRDEIDDNALKADIEEFAQNERPILEAQLRRVHRYRSQLQAA  
CR  
AFGWEPERGFVDSETREGQDFLSEVHYFLMESMSKALDDNAVQWMKNEFDSPSTLIPLYLSGYSKELYDA  
IQ  
EKLPEPTNYLTGNDYDDVANRANELDSLSTELIKDSPFFKALTAPLQNVLTAFSGS IQVASDAAVSSIA  
HK  
SASLLVLTNNHNF LHF NIVA EKIALNASIRIADNYKADVQKWRARYNNASQELRWIEQELRHLKASRKHN  
VS  
IAGIDERDSERIKSQKKKMSVLQREAQVKLSLDDIYYDNPSALVVAKGNVNDLAKDFRKG IQTRIKMGM  
EI  
TSSSYNKLGGFGFIVFLLNVNDFRLAFGAMQAKRVVSDRERVEVLQKMGYTL SAFGAI FQAKAWSSVTNG  
VE  
REFYKQSITSAIKGTSNLNAENNLKNAKNINKFLKITRAVSILSLLAVGSEMYTTYDYDIKKATGIEKWLO  
LA  
KLGSLGGMGFISAIHLGATLFPASAIIGIFALIGIIIAGAVVGVVYIITIVLNALKKDDYQKWLQQTPW  
GN  
IPNKSWTIDSSEGVINALLALYTISLQPKLTVKKS IKRIESGKDYPANTRTTGFTLKL ELSHDITPDHV  
DI  
KFIEPINLNSDDGIWTRVKDPIIVDKYIPTYT LQAGFSQE HQNIDIEIGLFFVANENNQLFKEVFYRYVF  
DY  
SMFGDLETRISPLYDDQKAVHLKDLQGKNSRDYCLHLHGKPIEETYFSDAKQCLLI-----  
--  
-----  
--  
-----  
--  
-----  
--  
-----  
--  
-----

>A0A2N1YXA1\_9GAMM/1-1145

MSTTTSDKTLQAKRNQAFENKPASANGQCPLKAGEIAIYPVRYAIDESPARGSAQGNPLAKGWSSKHL  
PS  
LKTRS YTLRQLRDGWLYVWDETDR TLHEYQVQGHQFIRHQWGS AQLGKDERSNPGA AKPYLLYPRRNRL  
IA  
YAPVQWTWRLCEKMRSNPHEQKRWMRALDLSQYCNM QAHAAPIRELGS AVADILAGGQAPT FNSCLVA  
AS  
TTDASRPCKRPIDQALV LGSVPDQDSALFVALDDPLAIVDDLAMNLQGRWLELAAAETQHGNKTSSATLV  
QK  
LCGVELAPYIPKAVAASPTRKQAFIKDAHNLDDKEAQLRHHNGSDATLTLKSLNVQQAQKQFRTTWGTL P

SG  
PKWQLLVEEWHQKKIWREDVRFDEAWAYLQERSDEMERNLNGHIQRSETDLLAWLESLSPKAEEVSYPCH  
PQ  
QTTELLATMANLYEQLGASETGKRWLCKQYGRPTTLAQLALFNFNPELSALIDKVSANFSTYGTIDDQGR  
QG  
DGSGQAHGGLSDTTSEATRTNEVKSVDLPSVQSSQLYKSLSEPAKRAFETLRTVVGQKAKDSWNLIAFT  
LL  
PALSTEFAPKVRIFAYSVTQVLVSTEISTQTQLVIDADFAKKNRQWQMQFAQLEKQIKGLQRTLALPGKG  
PD  
KRSARIQLGGLEQQRETLNLQRPNEIVGAIVSETRITTVQTRQVNIWLATLGQSELLDQLQLKLNAAAGH  
AA  
RSRQWVNQELGGSLPVLVAGLNIWNFLNSLDKANNDGILSADELRSVGANAAYTANALMALWVPAWNKW  
AG  
LQGSRLRTRTSQLAKAGVSAWLKAGSPEFAVLARKLVLRTMGMAAFGAIAGVEAWQVSKDIEKSTSTAEK  
SA  
LVTKVAALGMMTLLAGAQLIGSTLGFWFGFAWMSNPVTIIIIALLGVIYLISSMIANQYKREGLRLWLRYR  
CS  
WGKTPTWSHSDHDEHKDELRTLREICLRPNLVARATSLPYYDRGPRAYTGFWLQLLLPSELAGTSVQLQPA  
MV  
DSGWFSDSLMOGMSDKFYNQLLLEGHWAPVEQFGQPPAQRPSGALPGDCTYKAAQHRVWQTWVAYQRRPM  
LE  
LEVRYPEQVLASANGRGYMFRLAVDSSADEADLKSDAFSKEPNADMVLSSQGTQLLTLNIPNASQ-----  
--  
-----  
--  
-----  
--  
-----  
--  
-----  
--  
-----  
--  
-----  
--  
-----  
--  
-----

>A0A3M5FN15\_PSESS/1-860  
MVGMHLMGYFCIQRAKLPVSAQRVSHMTDKHGHQRRRAALFPKTPATATSLCPFRGPYVAIVPVRYALD  
RS  
RYDAAPEQLKPLPKQGKALMPTLKTRSYTLRQLYDGYVYVFDETAGTLHEYVVSANNGHLSRIVWTDQAQ  
IG  
NDQRSGASDGKPFLLYPRRNTLHIAFSPQQWTWRVCEHMRSSAPSRALWMKALDLASYCITMAEPDTLPL  
NR  
IAEAVANIDKGHVADDGRFADSAIPTARPLSEDAETHLLWAPLGADVFWQGSVDDQDSSLLIALDDPLAV  
FN  
DLGMQLAADQAAFRDWQAEHEHKIQIAQTVSGLCGAESDPQKLPASVRGNAARTHQYLSEVEAYFEQCIL  
EE  
AQISSSNVPGDFLLLPMFKSLDMRKSIEARYGSAPTEEAQTWKDRHKWRREVDLGSARQYLQHLPSG  
DA  
LLQQVRDTQRDFQLWATHIGTDPLKLFIDTTRPTQLLYLQTIMLNLQIIYAQDSAATTWLAEQEANATTL  
FG  
SLRYGFSPALKQALHQEADALLNGLGDVTNLATRIGELNGALNHQGFADKPMKALKQPVQGTFKALGEL  
AS  
GAGKTTLESILLAWVPIDSRMALGKQONIVALLRLLIGQMLLGSKARIAVDQVFTKLKQWIREWQVLN  
KQ  
ISDTRRSWLYPTAYNTRKSNASHLRVLEEKLRLHELIPALLDYQNNQYAKQLQDEIRLHFQSGKTMAKD

WL  
TTAKRWIDGLGGIAGSITWGVIMLNFINTALTYRDLTRDGDGFSKDIGKVITYGLGYSFNLLMAVFVEAPW  
AV  
ISTAKPVVIGTYTVGILDQSAAYWKARGNAVWGDAIRGFRSSMVAMGAFGIAAATLELKDILEDGIL---

-----  
--  
-----  
--  
-----  
--  
-----  
--  
-----  
--  
-----  
--  
-----  
--  
-----  
--  
-----  
--  
-----  
--  
-----  
--  
-----  
--

>A0A3M5WSP5\_9PSED/1-1057  
MKTRSYYTLRQLYDGYVYVYDEDAKTLDEYAVSAATGNLSRIVWTDAQLGSDQRSGGSDAKPFLLYPRNNL  
LR  
IAFSAQQWTWRICEHLRSNPESRASWMMKALDLKRYCMTMAEPDTLPLNRIAEAVADIDKEHVVGDDRFAD  
SA  
IPTSKASSEETQPLFSPIGADVFWQGSVEDQDSSLLIALDDPLAIFNDLGMQLAADQAAAYRNWQAEHEHK  
IQ  
IAQTVTTLCGAEGEPEKLPASVRNNAALHQYLGELEAYLEQCILEEAQISSSNVPGDFLLMPDMFKSLD  
MR  
KSIEMRYGSAPSDEALQAWKDRHKWRREVDLSGARAYLQQHLPTGDTLLQKVRDTQSDFRQWSTHLGTEP  
LK  
LFVDPTHPESELLYLQTLMLNLQIIYAQDNAASAWLAEQEANDSSLFGTLRYGFSPALKHALHQEANALLN  
GL  
GDVTNLATRIGELNGTLNHQGFADKPMKALKQPVQDTFKALSQLVSSAGKATFESILLAWVPIDSRMAV  
GK  
QQNIVALIRTLIGQILLDSKARIAIDHNMLAKLKNWSEWRVLNKQINDTRRSWLYPTAYNPRKSIASH  
LR  
ALEQKRLRHELSPALLDYQNNRYAKQLQDEIRLHFQSGKAITKEWLG TARRWLDGLGGIAGSITWGVIM  
LN  
FINTALTYRDLTKDGDGFSMKDIGKVITYGLGYSFNLLMAVFVEAPWRVIKASPVLIDGRNVGILDRSAGY  
WK  
ARGNVAWGEAISGFRVSMVAIGAFGVAAATLEIFDIQDDL TGLKTNEEQIATQIKIASVGMGLGSAACL  
IS  
GIYPSSFLTAFAMGSWFSVVLMLTGAVYLLSTMALNYFKQDSIGWWRKCSWSNSIAYKYPTNAEGQFEE  
KR  
ALFKIQLSPQIHVKSTTRDKDHYFGRDSPYSAPAQYGAGVQILFPGALRGQSVHFNVISSKRPWGVLPVE  
EI  
KSPIHEPFLDRGQFKSVDQFKTLANKPLGNAHEDFTFPLMPPAGEDVVWETWVPLEEGATYLELQIWHSD  
EL  
INPGPEDIGYLFQVKLNSEGETKMDGLSTTDLEVKAASRLGSPTLEIAE-----



>A0A3M4VWH0\_PSECI/1-790

MRSTASSRFTSKYPLKTHLTARPMTKKYGTQERRAARFDKSPSSATCACLYKTADIAIVPVRYALDRSR  
YD  
VEPTQLKPLPARGQWSPLPRLKTRSYTLRQLYDGYVYVDETAGTFHEYISASDACLTRIVWTAHLGQ  
DV  
RRGDGEGHPYLLYPRKNRHLAFSPVQWTWRICEHMRSRSHADSRALWMKPLDLSNFCATRNEPGALPLMAL  
AT  
AVADIDKNYVVEDKRFADSSIPTAGPESQPDQAEQSVFNPLGADVWLGWVDPDRCSLLVALDDPLGVFN  
DL  
GMQLAGDQAAFQWQHEHEHTLQIAQTVTALCGANGDVQKLPASVRGDSARTQHLYLNEMEEYFDQMDLEE  
ML  
TMHGNSPGGSLGTMDMYKSADMRDALRSRYGRYPSEDDRQAWKDREKWRREVDLKGARAHLHHHLPLSEA  
LL  
QQVRDTQADFQWAEYLGNDPLKLFIDTANPKTLLYLQTVMTDLLMVYGDQDQASAWLADQEARGGSLFG  
TL  
RYGFSPGLKDALDQEANALLGGIGDFTNLATRAGELNAVLNHQGFADAAMKTLKQPVQNTFKALRELAS  
GA  
GKTIAENMLLAWVPVDSRLALGKSQNLVALIRNFMIGQILANTPEMIRINEQLASQLKQWKREQRHLIKQ  
ID  
DTRFNWLYPLDPRERRHLARQLQSQDALRLHELKIPGLLDFQNNQYAQLLQEEIRAFFKSGLDVAKDWH  
TR  
AKAWSERLGGAGITWGVILLNFINTAFLYEDLTRDGDVSGKDIVKVGYSLGYSFNLLMAVFVEAPWAV  
--  
-----  
--  
-----  
--  
-----  
--  
-----  
--  
-----  
--  
-----  
--  
-----  
--  
-----  
--  
-----  
--  
-----  
--  
-----  
--  
-----  
-----

>A0A427DV21\_9PSED/1-1127

MNQKNGSPEQRRATLFAKTPATATSLCPFKAIEVAIVPVRYALDRSRYDVCQTLKPLPASGVWADLPTL  
RS  
RTYTLRQLYDGYLYVYDETAGTFHEYAVSASDSTLARIVWTDQAQVGNDRSGAADPKPFLLYPRMNRLHL  
GF  
SPRQWTWGLCEHMRSNADSRARWMQPLDLAAYCTTMAEPGTLPLSRIAEAVADVRENKQDGRFDDSSV  
PT  
TNGNAEAAYSAAAGCAPAGADVWLGSPDKDSALLVALDDPLAMLTDLGLQLAADQAALRAWQDEHGKKA  
GT  
AKTVTNLCASSNDPNLPAAVSNDVVLTRQRYLGEVDACLERRLTEESEQLASSLRGDALMTPVSLQSREM

KE  
ALQARYGTILSDQDYTFWEQRAKWRREIDLEGARAYIARHQAPAGDLLTQAVRDSQADLIQWADYIGVDPG  
VV  
FIDTANPGSLLYLQSIMSELLIILAQDAHTHEWILLEQEETATSLFGTMRYGFSAGLKDALHQDADRLNG  
LN  
DYTNLATRAGELNSVLNHPVADSAWMKLLKQAVRETFALSSELAAGEGKGAETILMAWLPMDSRVKG  
AH  
QNLTAIIRTLMIGRVLNSPQRLAIDAEVGNRLKTKRENRLDCHKIRGLQRSWQYPTTGGYDRRSLTRQ  
LQ  
QLNETLQLHYLKIPALLDFQDRQYAQLISNEVRTFLQSGQPFERWQATANNWIGRQKMDGATGITWGVIM  
FN  
LINTAFLYADLTRDGFSELDIIVKGYGLAYTVNLLMGVYVTAPWAVIQAAQPLVAGGKTVTILERSSSY  
WA  
ARGNPVWADAVRGFRAGMVMAGAFGVAGAVLEWVDLWQDIKNAQTPQEKALLWVKSGAVALMGLGALAYL  
TA  
GILPKAIAAAVMSAWMLGVLISAIGVIYLFSTMLLNHLKQDSVGLWLRCCWSISNGSRYPDTPEGAAEEQ  
RH  
FLKIALSPTVLVKQTFQYENLLVINRGIVRIPAQNGAWIQILLPHNLRGRSIELNIISSERPLSIMTVEK  
SS  
ANLDTYFLNYGQFRSTASFGSVTNERPPRNPNDLCFPPTPPEEDIVWQTWVPLEKQAGFVELQIWFPKDL  
VV  
PDESDTGYYLQIESSRDAEITVDGLLPVQLEVKTLPRTGSMKLEVPA-----  
--  
-----  
--  
-----  
--  
-----  
--  
-----  
--  
-----  
--  
-----  
--  
-----  
--  
-----

>A0A3M4XKQ6\_PSESS/1-809  
HQORRAALFPKTPATATSLCPFRGPYVAIVPVRYALDRSRYDAAPEQLKPLPKQGKVALMPTLKTRSYTL  
RQ  
LYDGYVVYVDETAGTLHEYVASANNGHLSRIVWTDQAIGNDQRSGASDGKPFLLYPRRNTLHIAFSPQQW  
TW  
RVCEHMRSSAPSRALWMKALDLASYCITMAEPDTLPLNRIAEAVADIDKGHVADDGRFADSAIPTARPLS  
ED  
AETHPLWAPLGADVFWQGSVDDQDSSLLIALDDPLAVFNDLGMQLAADQAAFRDWQAEHEHKIQIAQTVS  
GL  
CGAESDPQKLPASVRGNAARTHQYLSEVEAYFEQCILEEAQISSSNVPGDFLLLPDMFKSLDMRKSIEAR  
YG  
SAPTEEAAQTWKDRHKWRREVDLGSARQYLQQHLPDGDALLQQVRDTQRDFQLWATHIGTDPLKLFIDTT  
RP  
TQLLYLQTIMLNLQIIYAQDSAATTWLAEQEANASTLFGTLRYGFSPALKQALHQEADALLNGLGDVTNL  
AT  
RIGELNGALNHQGFADKPWMKALKQPVQGTFKALGELASGAGKATLESILLAWVPIDSRMALGKQQNIVA  
LL  
RTLLIGQILLDSKARIAVDQQVFTKQWIREWQVLNKQISDTRRRWLYPNAYNTRQSTARNLHAHKQKL  
RV  
HEL SIPALLDFQNEAYAKLLQDEIRQYFQSGKTLAKDWLAQAKRWTDRLGGTAGSITWGVIMLNFINL

TY  
RDVTRDGD FSAKDIGKVTYGLGYSFNLLMAVFVEAPWSVIRDATPELIDGKNVAILDRSSAYWKTKGNAT  
WG  
NAIRGFRVSMVAMGGFG-----

---  
-----  
---  
-----  
---  
-----  
---  
-----  
---  
-----  
---  
-----  
---  
-----  
---  
-----  
-----

>A0A0P9GG94\_PSESX/1-690  
MHTTRDIARFCAEIPCMTDKSGTHTQRRRAATFAKIPATATSLCPFRKPEVAIVPVRYALDRSHYDTAPQK  
LK  
PLLKGSRWAVMPKLKTRSYTLRQLYDGYVYVYDEDAKTLDEYAVSAATGNLSRIVWTDAQLGSDQRSGGG  
DA  
KPFLLYPRNLLRIAFSAQQWTWRICEHLRSNPESRASWMKALDLKRYCMTMAEPDTLPLNRIAEAVADI  
DK  
EHVVGDDRFADSAIPTSKASSEETQPLFSPIGADVFWQGSVEDQDSSLLIALDDPLAIFNDLGMQLAADQ  
AA  
YRNWQAEHEHKKIQAQTVTTLCGAEGEPEKLPASVRNNAALHQYLGELEAYLEQCILEEAQISSSNVPG  
DF  
LLMPDMFKSLDMRKSIEMRYSAPSDEALQAWKDRHKWRREVDLSGARAYLQQHLPTGDTLLQKVRDTQS  
DF  
RQWSTHLGTEPLKLFVDPHPESLLYLQTLMLNLQIIYAQDNAASAWLAEQEANDSSLFGTLRYGFSPAL  
KH  
ALHQEANALLNGLGDVTNLATRIGELNGTLNHQGFADKPWMKALKQPVQDTFKALSQ LASSAGKATFESI  
LL  
AWVPIDSRMAVGKQQNIVALIRTLLIGQILLDSKARIAIDHNMLAKLKNWSEWRV LNKQINDTRRSWLY  
PT  
AYNPRKSIASHLRAL EQKRLRHEL SMPALLDYQNNRYAKQLQ-----

---  
-----  
---  
-----  
---  
-----  
---  
-----  
---  
-----



>A0A3M4BRN0\_PSEAV/1-758  
MTDKHGTHQORRAALFPKTPATATSLCPFRGANVAIVPVRALDRSRYDAAPEKLKPLPKQRKWALMPTL  
KT  
RSYTLRQLYDGYLYVFDETAGTLHEYVASANNGHLSRIVWTDQAIGSDQSRGASDGKPFLLYPRRNTLHI  
AF  
SPQQWTRVCEHMRSSAPSRALWMKALDLASYCITMAEPDTLPLNRIAEAVADIDKGHVTDDGRFADSAI  
PT  
ARPLSEDAETNPLWAPLGADVFWQGSVDDQDSSLLIALDDPLAVFNDLGMQLAADQAAFRDWQARHEHKI  
QI  
AQTVSGLCGAESDPQKLPASVRGNAARTHQYLSEVEAYFEQCILEEAQISSSNVPGDFLLLPDMFKSLDM  
RK  
SIEARYGSVPTEEAQAWKDRHKWRREVDLASARQYLQQHLPSGDALLQQVRDTQSDFQLWATHIGIDPL  
KL  
FIDTTRPTQLLYLQTIMLNLQIIYAQDSATSTWLAEQANATTLYGTVRYGFSPALKQALHQEADALLNG  
LG  
DVTNLATRIGELNGALNHQGFADKPWMKALKQPVGTFKALGELASGAGKTTLESILLAWVPIDSRMALG  
KQ  
QNIVALLRTELLIGQILLDSKARIAVDQVFTKQKQWIREWQVLNKQISDTRRRWLYPNAYNTRQSTARNL  
HA  
HKQKLRVHELIPSLLDFQNNYAKLLQDEIRQYFQSGKTLAKDWLAQAKRWDRLGGTAGSITWGVIML  
NF  
INTALTYRDLTRDGFSAKXXXXXXXXXXXXRCLLHLGA-----  
--  
-----  
--  
-----  
--  
-----  
--  
-----  
--  
-----  
--  
-----  
--  
-----  
--  
-----  
--  
-----  
--  
-----  
--  
-----  
--  
-----  
--  
-----  
-----

>A0A3M5H7Y7\_PSESS/1-927  
MVGMLGMYFCIQRAKLPVSAQRVSHMTDKHGTHQORRAALFPKTPATATSLCPFRGPNVAIVPVRALD  
RS  
RYDTAPGKPKPLPKQGWALMPTLKARSYTLRQLYDGYVYVVFDETAGTLHEYVVSANNGHLSRIVWTDQA  
IG  
SDQRIGPSDGKPFLLYPRRNTLHIAFSLQWTRICEHMRSSAPSRARWMKALDLASYCITMAEPDTLPL  
NR  
IAEAVADIDKGHVTDDGRFADSSIPTARPLSEDAETHPLWAPLGADVFWQGSVDDQDSSLLIALDDPLAV  
FN  
DLGMQLAADQAAFRDWQAEHEHKIQIAQTVSGLCGAESDPQKLPASVRGNAARTHQYLSEVEAYFEQCIL

EE  
AQISSNVPGDFLLL PDMFKSLDMRKSIEARYGSAPTEEAAQTKDRQKWRREVDLASARQYLQQHLPSG  
DA  
LLQQVRDTQRDFQLWATHIGTDPFKLFIDTTRPTQLLYLQTIMLNLQIIYAQDSAATTWLAEQEANASTL  
FG  
TLRYGFSPALKQALHEEADTLMNGLGDVTNLATRIGELNGALNHQGFADKPWMKALKQPVQGTFKALGEL  
AS  
GAGKTTLESILLAWVPIDSRMALGKQONIVALLRLLIGQMLLGSKARIAVDQVFTKQWIREWQVLN  
KQ  
ISDTRRSWLYPTAYNTRKSNASHLRVLEEKLRLHELIPALLDYQNNQYAKQLQDEIRLHFQSGKTKMAKD  
WL  
TTAKRWIDGLGGIAGSITWGVIMLNFINTALTYRDLTRDGDFAKDIGKVTYGLGYSFNLLMAVFVEAPW  
AV  
ISTAKPVVIGTYTVGILDQSAAYWKARGNAVWGDAIRGFRSSMVAMGAFGIAAATLELKDILEDFTART  
IE  
EKTAISVKGTSVFMGAGSTIQLAAGISPTAKITAVAMSSWLNVALLVAGFIYLFAMALNYL-----  
--  
-----  
--  
-----  
--  
-----  
--  
-----  
--  
-----  
--  
-----  
--  
-----  
--  
-----  
--  
-----  
--  
-----  
--  
-----  
--  
-----  
--  
-----  
-----

>A0A2X4AG92\_PAULE/1-1128  
MADKNGTLSQRRDARFADKPLSGTGTCPFKGPDIAIVPTRYALDRSRYDVDPARLTPLSAETQWEYFKPL  
QS  
RGHTLRQLRDFVYVYDETAEVLHEYRYDAKDASLMRVDWAEALPTLDVRPAEGERRTHLLYPRTHKLRI  
AF  
SPWQWTCRMCQLMSTSTVNRLSWMRELDLREYSRKKSARHGLPLTRLSNRVVADVDPYPINHDGRFTDSA  
HP  
PVADEEGKYPSVALAADVLWTGTVPDKESAVLIAALDDPVAMLEDLGMQLAADQAALFEFQAEHEHALNIA  
GV  
VESLCGVGGDKALLPASVRDDEVKSRQYIRDIEAYFEQLQVEDDSTQGQDSLTYGLAERPSQMLGEELKA  
KY  
GKLDPALRKSQDRSKWRREVDLDAARDYSEIQQAQLKTLRARVTETQEDIK VIAEWTGTEPMRLFVDT  
TH  
PASLLCLLDVMSDLLCNLSQDLSFSNWQLKEEEKSKTLLGLTRFGFSLAIKEALTDEANRIMQGVSDFTA  
LA  
GRAGELNGFLNHQALAEKPWIKLTTEPARLTL SALEELAKGAGRTALENIQLAFLPVDSRLSKGAVGDSA  
AL  
MLRNLVMGHVLLSHPEKMQINEDFAKRHAAWRADLKKGRDLYQTAHRWLYQANEYDRRATAKLMQDIQH  
EL  
KRHLLNEPRPFDYHSKRYAEAMQNKISTFFARNGQLTQEWTHQAKAWSAEHGLNAAAITWGIAAINLFNT

MI  
TYEIASRDGELSKKDWAKIGSAAAYTGNALMAVAVFVETGWGVMKDLSVPGKDSKPIKITHQSAAQWRAVGK  
PG  
WGKLLNAFGARLVGLGGFAVVAAALELWDIGDDYASTDVSLDKSVILMKKYAVLGFLIVGGIQVSAGVAL  
LL  
GSGAMAALVMSPWFLGVTALIGLVYLLSTLTLNLYLKRDLVGSWLQKCRWSRYWEERFKSEIEETHAFFEI  
QL  
APAVFVKPTFEIKYSSSSVGS LPTETQNGAWVQLLFP GAVRGEI I KLNVAATGRPFPGFPVEKVAGSLK  
EY  
FTGYGTVEAVGQWRNAPPSKTQMRWNEPPYKNSPPTDEVVIWQTWVPLGEDAQYLELQVWYAPETIAIRE  
GD  
NGYRFQIELVKGGQIDNSES RVVGTNKGSL E IETL GGRDEALALPVPI-----  
--  
-----  
--  
-----  
--  
-----  
--  
-----  
-----

>A0A077LQ77\_9PSED/1-1125  
MTEKYGTARQRCASEFDKRPLSGTSLCPFKGPNIAIVPVRYALDRSRYDPAPEALKPLARAGKWARLPPL  
KS  
RTYTLRQLYDGYVYVYDETAGTLHEYLYTASDAHLARITWTQAHLGQDERSGAANAQPFLLYPRNHVLHI  
AY  
APLQWTWRICEHMRSNAVGRSQWMKRLDLGSYCITMNEPDTLPLAQLASAVADIDPCKVNEDLRFSDSAL  
PS  
SQPPFNRQDGSSPWVPLGADVHWLGSVEDKDSSLLIALDAPLSILEDLGMQLLADQAAYQSWLSQHEHKL  
RM  
ASTVSQLCGVSDDTASLPESVRDDPALRQQYLLDVEAYFRERLIDQASLAGSASTSSFSVSEIKSARMH  
RE  
LIQRYGKVPEDQLQAWQDRKKWRREVDLKAARQHIMQQPEHDRLLRQVQNTQADIKQWAIQIGLEPLRL  
HC  
DTGNPKHLLLLQNSFEELLSILTQSQGANEWLADQEQNASTLFGTLRYGFSPALKEALQAEADKLLNGFN  
DL  
TNLATRLGELNNTVLNHPDFADTAWMKALQQPARDTFNTLRELARGAGKQTAEAILMAWLPIDSQRAMGKR  
KD  
LPALLRSL L IGLVLGNAPQRLVIDARIGSEVRTWHANWNRLNANLRTL YSHWN SPQERGQRKHLSSLLQQ  
ER  
DRLRAHELKLPLIIDFQDNQYARLLRDKIHDFHSGKDIAKHWNAEARRWVQQTGLHGSGIAWGVIMLNF  
IN  
TALVWEEVSRDGQLNNKDLVKVGYSLGYTLNLLMAVYVEAPWEVVKNAKPVMINRKNVSILERSAAFKA  
QG  
NTHWSQTVTQLRSRLLVTGAFGIAAAGMEIWDLRDDYKNAKTDEERSAIATKMIGVYIMSTGAAAQVLAS  
TT  
TIRQLGTATTLVMSGLFSKIIIFIGGLIYLLASVILNTIKQDSVGYWLKKCSWSRIQETRYPDTPQNAEE  
QR  
AFYEIQLTPKVLVKSTRERAYMGMADSQMQLQNGAWIQIQFPHAIRRRTILFETSSSTRILPLLPLRPGA  
LP  
IRESFQENGLFY SIEHWDKIDNQRPVFTYPR LHCPLL PDNEDVIWQTWVPLVPEAVYLEIQIWYPVDSFK

PS  
PEDTGYLYQLEISVNSNSTFDGLLKPQLLMKNTSRSTALPLLIAP-----  
--  
-----  
--  
-----  
--  
-----  
--  
-----

>A0A239GPN7\_9PSED/1-1173  
MTQPATTPQIKQAQRNQAFDDTPLSHGQCCLMAGEVAIFPVRYALDESPEKGTNQGNPLPSDWQGGALP  
SL  
QTRSYTLRQLRDGWVYVWDSIDKTFHEYEVKGEQFTRHKWTDKQLNQDVRNNPGESLPYLLYPRRSRLRI  
AF  
SPVQWTWRICELMRSSTKEQGQWMREVNLPAFCLSGRVANGGPICALGESLADILPTPKKPTFATTTLPT  
QA  
GDDEPAGPFKATFEEALVRGKVPDQDTALFVALDDPLALVEDLNMNLMGRLAEQSLYENQHQHKLQSAQS  
VI  
QLCGVDTDALTPASVKDPVQRADCAKDIYQRLSAEDKATALRNSMSPIAQGMHGMPDTRFIDAQQIAEAA  
QA  
AFNSKWGAHISDQQWQATLKDWSKSKWREDFVFFEDVVSFYAETTQQLLRLQAHQRSEHDLITWLNALK  
PN  
AEAVYYDSCNAAQSAELLGLAYAVYVALSGCEAGKEWLLKQKAPDNLLGMALFNFSPLEAMVKQVSAN  
FA  
ATGSLDDQGGQDSSPLLDPSSPGDITNVSTRVAELKGVLDTGVLQKTAVYKALSSDAKQAFDTRLRLVAN  
DI  
ASEAWHGLSOLLIPAMKEVNAIKLSALQVLISTEISGATQLVKNPNYASEFQAWTRKVIPLNRQKSALQR  
VL  
YSPGLAHDKRSARIQLNKLDEELNALFLQRPLETFKAVQGGGRISLGPDKVQILLSDLGQAEVAAQLRLK  
AL  
NTAAYSQRAKAWVGQNLGKSLPALLVGLNAWNFYVSKQAANDGSFSADEWRNMGSSAAFTANAMMTFAV  
AP  
MWERAAAGMAATLDEKVTKVAKASYRAWVGEARAAAASTAGGSAVAGEFAAFSKALILRTATWAVLGAVAC  
GL  
EAWQLYKDAHNATSKQEEKLIYAKMGIVAVMGTVAGVQLVGALAGFFFGFSWVMATPIGIFLAVLGAAYL  
IL  
SMMINNAHREGVRRWL FHCNWGREPNPEWSVETDTGHAAQMNALVETLQQPTLVSRAVEDVHQYSTPYGG  
GV  
SVSTPKGFWLQLLL PKLVAGHDVMLQPAMVDTHWFTDDTLRATPAGYSEQFLNGFWADPKTFQTLPTTEG  
GN  
TLPADYRYNDEDTHRLWQAWIDTSLRSPVLELEVYTPPEVLQRKGGRGYILQLAISTSQADRQNNAFE  
AA  
LNKELVLARHSTQQLTLPVPN-----  
--  
-----  
--  
-----  
--  
-----

>S6JSY2\_PSEST/1-1145

MSTTTSDKTLQAKRNQAFENKPATANGQCPLKAGEIAIHPVRYAIDESPARGSAQGNPLPKGWNAGHL  
PK  
LKTRSYTLRQLRDGWLYVWDETDRTLHEYQVKGHQFIRHQWGNAQLGKDGRNPNPGDSKPYLLYPKRSRLL  
LA  
YSPMQWTWRLCEKMRSNPQEQKRWMRALNLPQYCTQMQAHAAPIREIGSAVADILAGGEAPTFKSCLVA  
TN  
KDDSSRPCKQSIDQALILGSVPDQDSVLFVALDDPMAIVDDLAMNMQGRWLELAAAQKQHANKLNSAENV  
QR  
LCGVNLDPLIPKSVSANPSRKQAFIKEAHSLLDSEAQLLNHSGSDATLTLKFLQVQQAQKQFRTNWGTLP  
SG  
PEWRALVEEWQKKIWRDVRFDEVWTYLQERANEKDRLNTHIQRSESDLLDWLKNLSPKAEVFPYDPCH  
PQ  
QSTDLLDTMANLYEQLGASDTGQQWLCKQYGNPSTLAGLALFNFSTELSTLIEQISTNFTTYGTIDNLGR  
QS  
DGSQAHGGLSDDTSEVSRANEVKSVDLPSVQASNLKSLSEPGKRAFETLRNVVGGQKAKDSWNLMAFV  
LL  
PALSEKFVPTVRIFAFSVTQVLVSTEISTQTRLILDPEFAKKNRQWQMQVAQLEKNIKGLQRTLSPGKG  
PD  
KRSARIQLLGLEQKRETLNLQRPNEVIGSVVTESKITKVQTRQVNMWLATLGQSELLDQLQLKAKNSAGY  
AA  
RSRQWINQELGGSLPVLVAGLNIWNFINSLDKARNDGIFSEDELRTIGANAAYTANALMALWTPAWNKW  
AN  
MQGTLRTRTTQLAKAGASTWLKAGSTEFVSLARQLVLRMTGMMAAFGAIAAGVEAWQVSKDVKATSKAEE  
TA  
LNVKMYALMGMTAVAGVQLVGSVLGFWFGFAWMSNPVTIIIIALLGVIYLIASMVANQYKREGLRLWLYR  
SS  
WGKSPTWTHSDEDHKKELRTLTEICLRPSLAARASTLPYYGRGPRIYTGFWLQLLLPSKLEGTAVKLQPA  
MV  
DSGWFSDSLMOGMADKFYDQFLEGHWAPIEQFGQPPAQRPNGLPGDTLYPEGTQHRLWQTIAYQRPPV  
LE  
LEVRYPEQILESANGQGYMFRVDIGTSSSEADLKSDAFSKEPNNDMVLSSQSTRLLSLQVPHTSK-----  
--  
-----  
--  
-----  
--  
-----  
--  
-----  
--  
-----

>A0A1H0X0M2\_9PSED/1-1145

MSTTTSDKTLQAKRNQAFENKPATANGQCPLKAGEIAIHPVRYAIDESPARGSAQGNPLPKGWNAGHL  
PK  
LKTRSYTLRQLRDGWLYVWDETDRTLHEYQVKGHQFIRHKWGNAQLGKDERNPNPGDSKSYLLYPKRSRLL  
LA  
YSPVQWTWRLCEKMRSNPQEQKRWMRALNLPQYCTQMQAHAAPIREIGSAVADILAGGTAPTFSCLVA  
TN  
KDDSSRPCKQSIDQALILGSVPDQDSALFVALDDPMAIVDDLAMNMQGRWLELAAAQKQHANKLNSAENV  
QR  
LCGVNLDPFIPKSVSANPSRKQAFIKEAHSLLDSEAQLLNHSGSDATLTLKSLQVQQAQKQFRTNWGTSP

SG  
PEWRALVEEWQKKIWREDVRFDEVWTYLQERANEKDRLNTHIQRSESDLLDWLKNLSPKAEVFPYDPCH  
PQ  
QSTDLLDTMANLYEQLGASDTGQQWLCKQYGNPSTLAGLALFNFSTELSTLIEQISTNFTTYGTIDNLGR  
QS  
DGSGQAHGGLSDTTSEVSRANEVKSVDLPSVQASNLYKSLSEPGKRAFETLRNVVGQKAKDSWNLMAFV  
LL  
PALSEKFVPTVRIFAFSVTQVLVSTEISTQTRLILDPEFAKKNRQWQMVAQLEKNIKGLQRTLSPGKG  
PD  
KRSARIQLLGLEQKRETLYLQRPNEVIGNVVTESKITKVQTRQVNMWLATLGQSELLDQLQLKAKNSAGY  
AA  
RSRQWMNQELGGSLPVLVAGLNIWNFINSLDKARNDGIFSEDELRTVGANAAYTANALMALWTPAWNKW  
AN  
MQGTLRTRTTQLAKAGVSTWLKAGSAEFSVLARQLVLRMTGMAAFGAIAGVEAWQVSKDVKATSKAEE  
TA  
LNVKMYALMGMTAVAGVQLVGSALGFWFGFAWMSNPVTIIIIALLGVIYLIASMVANQYKREGLRLWLYR  
SS  
WGKSPETHSDEDHKKELRTLMEISLRPSLAARASTLPYYGRGPRIYTGFWLQLLLPSKLEGTAVKLQPA  
MV  
DSGWFSDSLMQGMADKFYDQFLEGHWAPIEQFGQPPAQRPNGPLPGDTLYPEGTQHRLWQTWIAYQRPPV  
LE  
LEVRYPEQILESANGQGYMFRVDIGTSSSEADLKSDAFSKEPNNDMVLSSQSTRLLSLQVPHTSE-----  
--  
-----  
--  
-----  
--  
-----  
--  
-----  
--  
-----

>A0A0H3YTE1\_PSEST/1-1145  
MSTTTSDKTLQAKRNQAFENKPATANGQCPLKAGEIAIHPVRYAIDESPARGSAQGNPLPNGWNAGHL  
PR  
LKTRSYTLRQLRDGWLYVWDETDRTLHEYQVKGHQFIRHQWGAQLGKDERRNPGDSKPYLLYPKRNRL  
IA  
YSPVQWTWRLCEKMRSNPQEQKRWMRALNLPQYCTQMQAHAAPIREIGSAVADILAGGEAPTFKSCLVA  
AN  
KDDTSRPCKQPIDQALIVGSVPDQDSALFVALDDPMAIVDDLAMNLQGRWLELAAAQKQHANKLNSAKNV  
QL  
LCGVNLDPLTPKSVSANPSRKQAFIKDAHSLLDSEAQLLNHSGSDATLTKSLQVQAKKQFRTNWTSP  
SG  
PEWHALVKEWQKKIWREDVRFDEVWTYLQERANEKDRLNTHIQRSESDLLAWLKNLSPKAEVFPYDPCH  
PQ  
QSTDLLDTMANLYEQLGASDTGQQWLCKQYGNPSTLAGLALFNFSTELSTLIEQISTNFTTYGTIDNLGR  
QS  
DGSGQAHGGLSDTTSEVSRANEVKSVDLPSVQASNLYKSLSEPGKRAFETLRNVVGQKAKDSWNLMAFV  
LL  
PALSEKFVPTVRIFAFSVTQVLVSTEISAQTRLILDPEFAKKNRQWQMVAQLEKNIKGLQRTLSPGKG  
PD  
KRSARIQLLGLEQKRETLNLQRPNEVIGSVVTESKITKVQTRQVNMWLATLGQSELLDQLQLKAKNSAGY

AA  
RSRQWINQELGGSLPVLVAGLNIWNFINSLDKARNDGIFSEDELRTIGANAAYTANALMALWTPAWNKW  
AN  
MQGTLRTRTTQLAKAGASTWLKAGSTEFVSLARQLVLRMTGMAAFGAIAGVEAWQVSKDVKATSKAEE  
TA  
LNVKMYALMGMTAVAGVQLVGSALGFWFGFAWMSNPVTIIIIALLGVIYLIASMVANQYKREGLRLWLYR  
SS  
WGKSPTWTHSDEDHKELRTLTEICLRPSLAARASTLPYYGRGPRIYTGFWLQLLLPSKLEGTAVKLQPA  
MV  
DSGWFSDSLMQGMADKFDQFLEGHWAIEQFGQPPAQRPNGLPGDTLYPEGTQHRLWQTWIAYQRPPV  
LE  
LEVRYPEQILESANGQGYMFRVDIGTSSSEADLKSDAFSKEPNNDMVLSSQSTRLLSLQVPHTSK-----  
--  
-----  
--  
-----  
--  
-----  
--  
-----  
--  
-----

>A0A1E4UZ61\_9PSED/1-1140

MTATAQNKQLQRAQRDQAFEQK PANASGQCPLKAQEFALFPVRYAIDESPPKGSRQGNPLPATWPTRHL  
PA  
LKTRSYTLRQLRDGWL YVWNETDKTLHEYQVKGYQFTRHKWTA AQLNRDTRHNPGETRPYLLYPKRSHLL  
IA  
YSPVQWTWRLCERMRSNPREQQRW MRS L DLSQYCTTLKASHAAPLRELGR TVADISTDGKSPAFQTCLVT  
AQ  
LDKDPERACKLGLHEALVLGQVPDQDSALFVALDDPLGVVDDLALNLQGRWQELLTHELDHANSTHTATL  
VQ  
ELCGVSLDPFMPKEVAKNPQRR AAYIRDAHALLDRSADCLHDAGSDGTLGYKATALERESKSFRTWGS  
PS  
GEGWLQAVEHWHRKRLWRNDVRYEEASLFLDEKSQAERLDAHRQRSEQDLQAWLERLSPRAEEVFYDPC  
HP  
EQATELLETMATLYSQLGASETGSTWLCKQYGRPTSLAGLALFNFSPELSSMVDRISENFIRYGTLDALG  
RQ  
DDGSGKAHGGIADTTSEVSRLNEVKAVLDLPSVKRSQIYRALSEPVR AAFD TLRDVVEQKASQSWNTIAF  
TL  
LPALSERFAPNLRIFAFSVTQVLVSQEISTQTQLIKDPGYKKKHQSWQMKMQTLLKKMAGQQQVIARPGK  
GV  
DKRAAQVQLAQLHAQRQELELRRPHEVTGAIHTTTRLTQVNATEITYLLATLGQSELLDQLQLKARNAAA  
YA  
ARAQKWFNRELGGSLPVLVAGLNVWNTLNSLEN AKRDGIFTAAELRTVSANAAYTANALMALWTPAWNK  
WA  
KLEGNIRGRTTQLAKAGVTSWASRNPGYATLARRLILRTMGMAAFGAIAGVEAWQVHQDVGSATSQEEA  
VL  
LKMKL GALGGMALMSGVQLIGSGLGFWFGFAWMSTPITLIVAVLGVLYLLVSLAANHFKREGLRRWLYL  
CS  
WGKAPRDHSDDQHKHELNALSEICLRPSVVARATALPYYDRGPRTYTGFWVQVLVPAELAGHEVTLQPA  
MV  
AKDRLRQGTGPDFYQRFQAGHWAPVSAYGNPPSKPPQ GALTTDTRYQAGDTHRLWQAWVSHPGKPELELE

VI  
YPQQFLANLRGQGYLFRLAIDVEADEAELKSDPFDPTPVKGMALSRQCTYWLPLTVPYGS-----

---  
-----  
---  
-----  
---  
-----  
---

>A0A3M5K888\_PSESS/1-851  
MVGTHLGMFYFCIQRAKLPVSAQRVSHMTDKHGTHQORRAALFPKTPATATSLCPFRGPNVAIVPVRYALD  
RS  
RYDAAPEKPKPLPKQGWALMPTLKTRSYTLRQLYDGYLYVFDDETAGTLHEYVASANNGHLSRIVWTDQAQ  
IG  
SDQRSGASDGKPFLLYPRRNTLHIAFSPQQWTRVCEHMRSSAPSRALWMKALDLASYCITMAEPDTLPL  
NR  
IAEAVADIDKGHVTDGDFADSAIPTARPLSEDAETNPLWAPLGADVFWQGSVDDQDSSLLIALDDPLAV  
FN  
DLGMQLAADQAAFRDWQAEHEHKKIQAQTVSGLCGAESDPQKLPASVRGNSALTHQYLSEVEAYFEQCIL  
EE  
AQISSSNVPGDFLLL PDMFKSLDMRKSIEARYGSVPTEEAQTKDRHKWRREVDLSGARQYLQQHLP  
DA  
LLQQVRDTQRDFQLWATHIGTDPLKLFIDTTRPTQLLYLQTIMLNLQIIYAQDSAATTWLAEQEANASTL  
FG  
TLRYGFSPALKQALHQEADALLNGLGDVTNLATRIGELNGALNHQGFADKPWMKALKQPVQGTFKALGEL  
AS  
GAGKTTLESILLAWVPIDSRMALGKQONIVALLRTLLIGQILLGSKARIAVDQVFTKQKQWIREWQVLN  
KQ  
ISDTRRRWLYPNAYNTRQSTARNLHCHKQKLHVHELSIPALLDFQNKYAKLLQDEIRQYFQSGKTLAKD  
WL  
AQAKRWTDRLLGGTAGSITWGVIMLNFINTALTYRDLTRDGDGFSKADIGKVTYGLGYSFNLLMAVFVEAPW  
SV  
IRDATPELIDGKNVAILDRSSAYWKTGNATWGD AIRGFRVSMVAMGGFGIAAAALGSR-----

---  
-----  
---  
-----  
---  
-----  
---  
-----  
---  
-----  
---  
-----  
---

>A0A365PPX2\_9PSED/1-1145

MSTTTSDTTLQAKRNQAFENKPANANGQCPLKAVDIAIHPVRYSIDESPARGSAQGNPLPKGWPSNHL  
PT  
LKTRSYTLRQLRDGWLYVWDETDRTLHEYQVKGHQLIRHQWGSAQLGKDERNNPGDSKPYLLYPKRSRLL  
IA  
YAPVQWTWRLCEKIRSNPQEQNRWMRTLNLPOYCTKMQAHAHAAPIREIGSAVADILAGGEAPTFKSCLIA  
TN  
QDDTSRPCKKPIDQALILGSVPDQDSALVVALDDPLAIVDDLAMNLQGRWLELAAAETQHANKTNSATLI  
HE  
LCGVKLDPFIPKSVSANPSRKQAFIKDAHALLDSETQLLNHSGSDATLTLKSLQVQRAQQFRTNWNPP  
SG  
PKWRALVEEWQKKTWREDVRFDEALSYLQERSDEMERNLNAHIQRSESDLLAWLKSLSPKAEVFDYDPC  
PQ  
QSTYLLDTMANLYEQLGASDTGKQWLCEQYGNPTTLAGLALFNFNAELSAIDKISTNFTTYGTIDNLGR  
QS  
DGSQAHGGLSDDTSEVSRANEVQSVLDLPSVQASNLKSLSEPGKRAFETLRNVVGQKAKDSWNLMAFV  
LL  
PALSTKFAPKVRIFAFSVTQVLVSTEISTQTRLILNAEFTKKNRQWQMVAQLEKNIKGLQRTLSPGEG  
PD  
KRSARIQLLGLEQKRETLNLQRPNEVIGSVVTETKITKVQTRQVNMWLATLGQPELLDQLQLKAKNSAGY  
AA  
RSRQWINQELGGSLPVLVAGLNIWNFINSLDKARNDGIFSEDELRTVGANAAYTANALMALWTVPAWNKW  
AK  
LEKTIGRNTTQLAKAGVRAWLKTGEVEASLLARQLVLRMTGMAAFGAIAAGVEAWQVSNDIRNATSSEEK  
YA  
QSTKMVALLFMSSVAGIQLVGSALGFWFGFAWMSNPVTIIIIALLGVIYLIASMVANQYKREGLRLWLYR  
SS  
WGKSTTWTHSDEDHKEELRTLKEICLRPSLAARAATLPYYGRGPRIYTGFWLQLLLPSLAGTAVKLQPA  
MV  
DSGWFSDSLMOGMADKFYDQFLEGHWAPIDQFGQPPVQRPSGSLPGDTLYPKDTQHRLWQTIAYQRPPV  
LE  
LEVRYPEQILESANGQGYMFRMDIGTSSSEADLKNDAFSKEPNSDMVLSSQNTRLLSLQVPHTE-----  
--  
-----  
--  
-----  
--  
-----  
--  
-----  
--  
-----  
--  
-----
